# Supplementary material for: Osteogenic growth peptide is a potent anti-inflammatory and bone preserving hormone via cannabinoid receptor type 2
Source: eLife. 2022 May 23;11:e65834. doi: 10.7554/eLife.65834 (PMC9154745; doi:10.7554/eLife.65834)
Supplement: Figure 1—source data 1. [file elife-65834-fig1-data1.xlsx]

## Sheet: Sheet1
	female mice			male mice
	3 mo	6 mo		3 mo	6 mo
	4.67	1.27		6.73	4.27
	5	1.67		17.32	5.4
	5.22	0.91		9.12	5.24
	4.59	1.03		13.42	3.8
	5.61	1.71		11.83	4.08
	3.7	0.62		12.1
