# Supplementary material for: Osteogenic growth peptide is a potent anti-inflammatory and bone preserving hormone via cannabinoid receptor type 2
Source: eLife. 2022 May 23;11:e65834. doi: 10.7554/eLife.65834 (PMC9154745; doi:10.7554/eLife.65834)
Supplement: Figure 1—source data 2. [file elife-65834-fig1-data2.xlsx]

## Sheet: Sheet1
CB2 expression
female					Male
3 mo	6 mo				0.0517469	0.0554354
0.0422767	0.0690433				0.0388935	0.0357355
0.0436854	0.0355723				0.112426	0.120297
0.0935749	0.0330837				0.0373525	0.0414796
0.0410882	0.100902				0.0369539	0.0540277
0.0352997	0.0515386					0.078299
0.0376154	0.0293781
