# Supplementary material for: Osteogenic growth peptide is a potent anti-inflammatory and bone preserving hormone via cannabinoid receptor type 2
Source: eLife. 2022 May 23;11:e65834. doi: 10.7554/eLife.65834 (PMC9154745; doi:10.7554/eLife.65834)
Supplement: Figure 1—source data 3. [file elife-65834-fig1-data3.xlsx]

## Sheet: Sheet1
female							male
2-AG		AEA		Arachidonic acid			2-AG		AEA		Arachidonic acid
3 mo	6 mo	3 mo	6 mo	3 mo	6 mo		3 mo	6 mo	3 mo	6 mo	3 mo	6 mo
8.6	3.45	3.94	2.48	10.68	4.02		7.11	4.8	4.43	3.37	8.83	5.97
6.48	6.4	4.34	3.54	8.05	7.95		5.97	5.27	2.63	3.81	7.42	6.56
8.1	5.08	4.23	3.85	10.07	6.32		6.72	5.46	2.44	3.68	8.36	6.79
4.46	3.48	3.33	2.85	5.45	4.33		5.58	6.93	2.98	4.66	6.93	8.61
7.52	10.98	5.02	5.59	9.34	13.65		8.25	4.62	5.49	4.11	10.25	5.74
5.66		4.35	6.6	7.03			4.77	4.93	3.65	2.5	5.93	6.13
