# Supplementary material for: Osteogenic growth peptide is a potent anti-inflammatory and bone preserving hormone via cannabinoid receptor type 2
Source: eLife. 2022 May 23;11:e65834. doi: 10.7554/eLife.65834 (PMC9154745; doi:10.7554/eLife.65834)
Supplement: Figure 2—source data 1. [file elife-65834-fig2-data1.xlsx]

## Sheet: Sheet1
Mock CHO cells cAMP (ratio)					hCB2 expressing CHO cells cAMP (ratio)
Veh	FSK	FSK + OGP [10-10M]	FSK + OGP [10-12M]		Veh	FSK	FSK + HU910 [10-12M]	FSK + OGP [10-12M]
0.87389	11.9556	11.6972	11.706		1.05309	8.92508	8.0468	6.95272
1.12877	15.5426	11.8686	10.7149		0.96686	10.1638	6.67944	6.94283
0.997336	11.3401	11.6154	10.2513		0.980053	10.3631	6.79205	6.15266
