# Supplementary material for: Osteogenic growth peptide is a potent anti-inflammatory and bone preserving hormone via cannabinoid receptor type 2
Source: eLife. 2022 May 23;11:e65834. doi: 10.7554/eLife.65834 (PMC9154745; doi:10.7554/eLife.65834)
Supplement: Figure 2—source data 2. [file elife-65834-fig2-data2.xlsx]

## Sheet: Sheet1
	Log(M)	OGP						OGP+SR2
1e-16	-15	91.31	148.41	105.18	61.51	58.53
1e-15	-14	69	76.86	57.41	85.98	71.58	95.87
1e-14	-13	65.26	82.92	63.12	92.9	96.35	63.23	118.08	160.19	106.3	81.47	76.1	47.78
1e-13	-12	37.6	61.15	50.98	38.95	31.07	93.86	103.62	121.82	90.6	94.14	60.64	77.82
1e-11	-11	58.65	72.75	92.92	40.39	68.9	63.91	52.94	52.23	117.36	58.43	31.55	55.27
1e-10	-10	60.08	51.52	75.79	85.02	69.57	75.04	89.7	101.48	85.06	69.28	82.53	77.63
1e-09	-9	70.79	38.49	81.5	79.94	69.28	54.21
