# Supplementary material for: Osteogenic growth peptide is a potent anti-inflammatory and bone preserving hormone via cannabinoid receptor type 2
Source: eLife. 2022 May 23;11:e65834. doi: 10.7554/eLife.65834 (PMC9154745; doi:10.7554/eLife.65834)
Supplement: Figure 2—source data 3. [file elife-65834-fig2-data3.xlsx]

## Sheet: Sheet1
hCB1 expressing HEK293 cells cAMP (ratio)
Veh	FSK	FSK + HU210 [10-8M]	FSK + OGP [10-12M]
1.47538	7.25941	9.26985	4.722
0.812203	5.37235	8.74891	6.13885
0.712416	6.55696	11.674	7.12679
