# Supplementary material for: Osteogenic growth peptide is a potent anti-inflammatory and bone preserving hormone via cannabinoid receptor type 2
Source: eLife. 2022 May 23;11:e65834. doi: 10.7554/eLife.65834 (PMC9154745; doi:10.7554/eLife.65834)
Supplement: Figure 4—source data 1. [file elife-65834-fig4-data1.xlsx]

## Sheet: Sheet1
HU910	WT			CB2-/-						OGP	WT			CB2-/-
Veh	100	108.333	91.6667	90	100	110				Veh	96.8554	104.762	98.718	108.197	98.3607	93.4426
10-14	108.333	100	91.6667	90	90	110				10-14	103.247	111.039	116.883	98.3607	103.279	93.4426
10-13	125	133.333	141.667	100	90	110				10-13	173.377	159.74	169.481	83.6066	93.4426	98.3607
10-12	175	183.333	183.333	80	100	100				10-12	192.857	198.701	194.805	88.5246	88.5246	98.3607
10-11	150	166.667	175	90	110	90				10-11	136.364	132.468	128.571	93.4426	103.279	98.3607
10-10	133.333	150	141.667	80	110	100				10-10	97.4026	105.195	101.299	93.4426	93.4426	83.6066
10-9	125	116.667	116.667	80	90	80				10-9	97.4026	95.4545	93.5065	103.279	88.5246	83.6066
10-8	100	100	108.333	100	90	80				10-8	95.4545	97.4026	101.299	98.3607	93.4426	83.6066
