# Supplementary material for: Osteogenic growth peptide is a potent anti-inflammatory and bone preserving hormone via cannabinoid receptor type 2
Source: eLife. 2022 May 23;11:e65834. doi: 10.7554/eLife.65834 (PMC9154745; doi:10.7554/eLife.65834)
Supplement: Figure 4—source data 2. [file elife-65834-fig4-data2.xlsx]

## Sheet: Sheet1
Human osteoblasts
				OGP 10-12 M									HU910 10-12 M
SR (uM):	Veh	10	0	0.01	0.1	1	10		SR (uM):	Veh	10	0	0.01	0.1	1	10
	97.4359	97.4359	202.564	194.872	153.846	135.897	107.692			97.4359	102.564	189.744	194.872	164.103	130.769	100
	102.564	92.3077	194.872	197.436	176.923	128.205	115.385			102.564	97.4359	184.615	189.744	148.718	123.077	120.513
	100	102.564	205.128	202.564	161.538	141.026	102.564			100	94.8718	192.308	187.179	153.846	120.513	102.564
