# Supplementary material for: Osteogenic growth peptide is a potent anti-inflammatory and bone preserving hormone via cannabinoid receptor type 2
Source: eLife. 2022 May 23;11:e65834. doi: 10.7554/eLife.65834 (PMC9154745; doi:10.7554/eLife.65834)
Supplement: Figure 4—source data 3. [file elife-65834-fig4-data3.xlsx]

## Sheet: Sheet1
OGP IN MICE OSTEOCLASTS
	WT						CB2-/-
Veh	223	235	199	284	273	233	289	238	294	268	245	262
10-14	241	195	227	247	187	242	215	257	283	310	292	308
10-12	196	264	249	180	200	210	265	310	273	297	283	227
10-10	162	163	162	146	167	154	268	246	243	226	272	320
10-8	187	185	150	173	147	171		269	215	223	282	223
