# Supplementary material for: Osteogenic growth peptide is a potent anti-inflammatory and bone preserving hormone via cannabinoid receptor type 2
Source: eLife. 2022 May 23;11:e65834. doi: 10.7554/eLife.65834 (PMC9154745; doi:10.7554/eLife.65834)
Supplement: Figure 4—source data 4. [file elife-65834-fig4-data4.xls]

## Sheet: Sheet1
620.6.13				Brdu OGP 10-14							%control
Nemco		cont	10-14	10-13	10-12	10-11	10-10	10-9	10-8		cont	10-14	10-13	10-12	10-11	10-10	10-9	10-8
		0.423	0.445	0.621	0.769	0.704	0.555	0.44	0.3		93.6877	98.5604	137.542	170.321	155.925	122.924	97.4529	66.4452
		0.447	0.435	0.643	0.765	0.619	0.585	0.431	0.302		99.0033	96.3455	142.414	169.435	137.099	129.568	95.4596	66.8882
		0.456	0.408	0.65	0.76	0.654	0.496	0.406	0.289		100.997	90.3654	143.965	168.328	144.85	109.856	89.9225	64.0089
		0.444	0.498	0.629	0.778	0.706	0.591	0.477	0.314		98.3389	110.299	139.313	172.315	156.368	130.897	105.648	69.546
		0.473	0.43	0.647	0.798	0.627	0.592	0.471	0.335		104.762	95.2381	143.3	176.744	138.87	131.118	104.319	74.1971
		0.466	0.404	0.65	0.788	0.751	0.532	0.395	0.335		103.212	89.4795	143.965	174.529	166.334	117.829	87.4862	74.1971
		cont	10-14	10-13	10-12	10-11	10-10	10-9	10-8
		0.423	0.445	0.621	0.769	0.704	0.555	0.44	0.3
		0.447	0.435	0.643	0.765	0.619	0.585	0.431	0.302
		0.456	0.408	0.65	0.76	0.654	0.496	0.406	0.289
		0.444	0.498	0.629	0.778	0.706	0.591		0.314
		0.473	0.43	0.647	0.798	0.627	0.592	0.471
		0.466	0.404	0.65	0.788	0.751	0.532	0.395	0.335
	MEAN	0.4515	0.436667	0.64	0.776333	0.676833	0.5585	0.436667	0.3125		100	96.7147	141.75	171.945	149.908	123.699	96.7147	69.2137
	SD	0.0177848	0.0339627	0.0121655	0.0145419	0.0518437	0.0387337	0.0332425	0.0191494		3.93905	7.5222	2.69447	3.2208	11.4825	8.57889	7.36269	4.24129
	SE	0.00726062	0.0138652	0.00496655	0.0059367	0.0211651	0.015813	0.0135712	0.00781771
	ttest		0.3656	1.09228e-09	9.53724e-12	1.49052e-06	0.000108414	0.357901	1.34373e-07			0.3656	1.09228e-09	9.53724e-12	1.49052e-06	0.000108414	0.357901	1.34373e-07
