# Supplementary material for: Osteogenic growth peptide is a potent anti-inflammatory and bone preserving hormone via cannabinoid receptor type 2
Source: eLife. 2022 May 23;11:e65834. doi: 10.7554/eLife.65834 (PMC9154745; doi:10.7554/eLife.65834)
Supplement: Figure 4—source data 5. [file elife-65834-fig4-data5.xls]

## Sheet: Sheet1
620.6.13				Brdu OGP 10-14							% control
Nemco		cont	10-14	10-13	10-12	10-11	10-10	10-9	10-8		cont	10-14	10-13	10-12	10-11	10-10	10-9	10-8
CB2		0.188	0.222	0.218	0.232	0.246	0.25	0.216	0.237		84.812	100.15	98.3459	104.662	110.977	112.782	97.4436	106.917
		0.209	0.226	0.226	0.233	0.175	0.269	0.228	0.24		94.2857	101.955	101.955	105.113	78.9474	121.353	102.857	108.271
		0.217	0.209	0.227	0.213	0.217	0.216	0.227	0.22		97.8947	94.2857	102.406	96.0902	97.8947	97.4436	102.406	99.2481
		0.227	0.262	0.272	0.217	0.269	0.269	0.267	0.232		102.406	118.195	122.707	97.8947	121.353	121.353	120.451	104.662
		0.243	0.244	0.266	0.208	0.205	0.269	0.274	0.226		109.624	110.075	120	93.8346	92.4812	121.353	123.609	101.955
		0.246	0.215	0.28	0.254	0.301	0.221	0.259	0.225		110.977	96.9925	126.316	114.586	135.789	99.6992	116.842	101.504
		cont	10-14	10-13	10-12	10-11	10-10	10-9	10-8
		0.188	0.222	0.218	0.232	0.246	0.25	0.216	0.237
		0.209	0.226	0.226	0.233	0.175	0.269	0.228	0.24
		0.217	0.209	0.227	0.213	0.217	0.216	0.227	0.22
		0.227	0.262	0.272	0.217	0.269	0.269		0.232
		0.243	0.244	0.266	0.208	0.205	0.269	0.274	0.226
		0.246	0.215	0.28	0.254	0.301	0.221	0.259	0.225
	MEAN	0.221667	0.229667	0.248167	0.226167	0.2355	0.249	0.245167	0.23		100	103.609	111.955	102.03	106.241	112.331	110.602	103.759
	SD	0.0218693	0.0198259	0.0273819	0.0169873	0.0457285	0.0247952	0.0243919	0.00766812		9.86585	8.94402	12.3527	7.66342	20.6294	11.1858	11.0039	3.4593
	SE	0.00892811	0.00809389	0.0111786	0.00693502	0.0186686	0.0101226	0.00995797	0.0031305
	ttest		0.521794	0.0936878	0.698959	0.518958	0.0703792	0.109416	0.399097			0.521794	0.0936878	0.698959	0.518958	0.0703792	0.109416	0.399097
