# Supplementary material for: Osteogenic growth peptide is a potent anti-inflammatory and bone preserving hormone via cannabinoid receptor type 2
Source: eLife. 2022 May 23;11:e65834. doi: 10.7554/eLife.65834 (PMC9154745; doi:10.7554/eLife.65834)
Supplement: Figure 4—source data 6. [file elife-65834-fig4-data6.xlsx]

## Sheet: Sheet1
	WT									WT
	OGP+SR									HU910+SR
	10	0	0.01	0.1	1	10	100			Veh	10	0	0.01	0.1	1	10	100
	109.091	201.818	196.364	163.636	141.818	109.091	87.2727			98.1818	109.091	190.909	190.909	163.636	125.454	109.091	92.7273
	98.1818	207.273	207.273	180	130.909	98.1818	98.1818			98.1818	98.1818	180	180	158.182	130.909	98.1818	98.1818
	103.636	190.909	196.364	163.636	125.454	109.091	87.2727			103.636	103.636	196.364	180	152.727	114.546	103.636	98.1818
