# Supplementary material for: Osteogenic growth peptide is a potent anti-inflammatory and bone preserving hormone via cannabinoid receptor type 2
Source: eLife. 2022 May 23;11:e65834. doi: 10.7554/eLife.65834 (PMC9154745; doi:10.7554/eLife.65834)
Supplement: Figure 5—source data 1. [file elife-65834-fig5-data1.xlsx]

## Sheet: Summary
PROJECT
			Full Humerus			CORT	CORT					Cort.Por		MOI		METAPH	METAPH								PROX						DIST
SPECIMEN	Sample#	Resolution	Length	BV/TV	vBMD	vBMD	TMD	Dia.Dia	Med.Dia	BA/TA	Cort.Th	Po.V	Po.diam	Polar	Areal	vBMD	Mater prop	BV/TV	Conn.D	SMI	Tb.N (3D)	Tb.N (Pl)	Tb.Th (3D)	Sp (3D)	BV/TV	Conn.D	SMI	Tb.N (3D)	Tb.Th (3D)	Sp (3D)	BV/TV	Conn.D	SMI	Tb.N (3D)	Tb.Th (3D)	Sp (3D)
[name]	[name]	[micrometer]	[mm]	[%]	[mg HA/ccm]	[mg HA/ccm]	[mg HA/ccm]	[mm]	[mm]	[1]	[mm]	[%]	[mm]	[mm^4]	[mm^3]	[mg HA/ccm]	[mg HA/ccm]	[%]	[1/mm3]	[1]	[mm-1]	[mm-1]	[mm]	[mm]	[%]	[1/mm3]	[1]	[mm-1]	[mm]	[mm]	[%]	[1/mm3]	[1]	[mm-1]	[mm]	[mm]
MEAN	12wk SHAM		15.513	0.5468	571.927	617.863	1311.15	1.46203	1.05462	0.479623	0.19734	1e-05	0	0.341664	0.240806	51.4343	826.379	0.05264	43.0938	3.08152	2.67531	1.51718	0.0523	0.36749	0.02218	19.4226	3.06412	2.4369	0.03616	0.40393	0.0676	51.4349	2.98287	2.864	0.05457	0.34433
SD	10		0.266544	0.0140618	24.4344	17.3285	17.4586	0.040287	0.0314428	0.0116681	0.00818131	3.16228e-05	0	0.0385143	0.021043	12.6677	35.368	0.0124297	13.572	0.21552	0.295805	0.313043	0.00598906	0.0430739	0.010571	9.67448	0.16404	0.356576	0.00300044	0.0575882	0.0145711	14.1894	0.179684	0.281327	0.00623236	0.0414794
SE			0.0842885	0.00444672	7.72682	5.47974	5.52089	0.0127399	0.00994309	0.00368977	0.00258716	1e-05	0	0.0121793	0.00665439	4.00587	11.1844	0.00393063	4.29185	0.0681534	0.0935417	0.0989928	0.00189391	0.0136212	0.00334285	3.05934	0.0518742	0.112759	0.000948824	0.018211	0.00460777	4.48707	0.056821	0.0889634	0.00197085	0.0131169
CV (%)			1.7182	2.57165	4.27229	2.80458	1.33155	2.75555	2.98145	2.43276	4.14579	316.228	#DIV/0!	11.2726	8.73858	24.6289	4.27988	23.6127	31.4942	6.99395	11.0568	20.6332	11.4514	11.7211	47.6601	49.8105	5.35359	14.6324	8.29769	14.257	21.5548	27.587	6.02385	9.82287	11.4209	12.0464
MEDIAN			15.505	0.5435	565.782	612.552	1312.78	1.46223	1.05883	0.477877	0.1967	0	0	0.340895	0.237805	49.5123	815.443	0.0474	40.8405	3.05545	2.72635	1.4098	0.0494	0.35685	0.01985	17.8987	3.0267	2.38975	0.0361	0.40885	0.0614	49.7311	2.95385	2.8847	0.05165	0.33995
MEAN	12wk OVX		15.3343	0.445714	514.676	562.721	1325.52	1.41444	1.08075	0.416492	0.160157	0.000242857	#DIV/0!	0.2714	0.192254	0.845829	928.747	0.0169714	5.72274	3.40274	1.85439	0.466971	0.0458714	0.548771	0.000642857	-1.50819	3.75589	1.78327	0.0181143	0.5732	0.0251429	8.59309	3.23316	1.96143	0.0461857	0.518271
SD	7		0.291425	0.0155318	22.3576	36.0946	41.2964	0.0502789	0.0540052	0.0194785	0.00623214	0.000276026	#DIV/0!	0.0329339	0.0140417	6.78205	20.5793	0.00425704	3.66744	0.318201	0.170389	0.106891	0.00327756	0.0504429	0.000582687	1.05216	0.235273	0.159463	0.00208361	0.0537849	0.00627531	5.5377	0.314522	0.183686	0.00338203	0.0524019
SE			0.110148	0.00587048	8.45039	13.6425	15.6086	0.0190036	0.020412	0.00736219	0.00235553	0.000104328	#DIV/0!	0.0124478	0.00530728	2.56337	7.77824	0.00160901	1.38616	0.120269	0.0644009	0.040401	0.0012388	0.0190656	0.000220235	0.39768	0.088925	0.0651004	0.00078753	0.0219576	0.00237184	2.09305	0.118878	0.0694269	0.00127829	0.019806
CV (%)			1.90048	3.48471	4.34402	6.41431	3.11549	3.55468	4.997	4.6768	3.89126	113.658	#DIV/0!	12.1348	7.30373	801.823	2.21581	25.0836	64.0853	9.3513	9.18842	22.8903	7.1451	9.19197	90.6402	-69.7634	6.26413	8.94217	11.5026	9.38327	24.9586	64.4436	9.72802	9.36492	7.32267	10.1109
MEDIAN			15.44	0.452	512.958	559.148	1301.61	1.391	1.0617	0.416488	0.1603	0.0001	#NUM!	0.25475	0.18777	3.5009	929.079	0.016	4.1855	3.529	1.853	0.47	0.0461	0.5406	0.0005	-1.3185	3.7915	1.7437	0.0177	0.57375	0.0236	6.1961	3.2648	1.9279	0.0464	0.5166
	OVX vs SHAM		0.209803	5.19846e-10	0.000185994	0.000734344	0.337158	0.046711	0.22544	4.80908e-07	4.3257e-08	0.0171179	#DIV/0!	0.00136823	8.77672e-05	8.69168e-08	5.51821e-06	2.87949e-06	3.97769e-06	0.0248534	8.74908e-06	4.26012e-07	0.0214493	9.03725e-07	8.38188e-05	4.65501e-05	3.20798e-06	0.000890322	6.88973e-10	4.39593e-05	3.06837e-06	1.78246e-06	0.0538638	2.16026e-06	0.00569994	1.49544e-06
			-0.0115203	-0.184868	-0.100101	-0.0892474	0.0109608	-0.0325484	0.0247822	-0.131626	-0.18842	23.2857	#DIV/0!	-0.205652	-0.201622	-0.983555	0.123876	-0.677594	-0.867203	0.104242	-0.306852	-0.692211	-0.122917	0.493296	-0.971016	-1.07765	0.225763	-0.268223	-0.499052	0.419058	-0.628064	-0.832933	0.0839082	-0.315144	-0.153643	0.505159
MEAN	12wk OVX+10ng OGP		15.2557	0.441286	522.836	580.135	1370.09	1.41764	1.08485	0.414568	0.159157	0.000414286	#DIV/0!	0.273146	0.192651	11.3489	960.744	0.0247571	10.0778	3.10426	1.74661	0.6293	0.0506714	0.598786	0.00124286	-1.3178	3.94187	1.65818	0.0205571	0.645133	0.0362857	15.0427	2.92533	1.93991	0.0511143	0.530057
SD	7		0.373491	0.013925	19.0664	20.3688	19.8465	0.0494335	0.0452832	0.0105373	0.0052987	0.000254484	#DIV/0!	0.0396468	0.0222358	10.904	29.6428	0.00757647	3.55523	0.408877	0.352345	0.164885	0.00642591	0.12978	0.00195947	0.684677	0.352559	0.448438	0.0051607	0.193752	0.0110066	5.53581	0.405573	0.279237	0.00677161	0.0810556
SE			0.141166	0.00526314	7.20643	7.69866	7.50126	0.0186841	0.0171154	0.00398273	0.00200272	9.61858e-05	#DIV/0!	0.0149851	0.00840436	4.12133	11.2039	0.00286364	1.34375	0.154541	0.133174	0.0623205	0.00242877	0.0490522	0.00074061	0.258784	0.133255	0.183074	0.00195056	0.0790991	0.0041601	2.09234	0.153292	0.105542	0.00255943	0.0306361
CV (%)			2.4482	3.15554	3.64673	3.51104	1.44855	3.48702	4.17415	2.54176	3.32922	61.4271	#DIV/0!	14.5149	11.542	96.0799	3.0854	30.6032	35.2779	13.1715	20.173	26.2013	12.6815	21.6739	157.659	-51.9561	8.94395	27.0439	25.1042	30.0329	30.3331	36.8006	13.8642	14.3943	13.248	15.2919
MEDIAN			15.25	0.44	519.518	586.889	1363.92	1.3986	1.06932	0.417228	0.1584	0.0005	#NUM!	0.25302	0.18422	10.607	962.56	0.0221	10.836	2.8833	1.8911	0.5421	0.0497	0.5326	0.0004	-0.9059	3.9939	1.69035	0.0173	0.59175	0.0321	15.8752	2.8028	2.0269	0.0499	0.4957
P-value (t-test, 2-tail)	veh vs 10ng		0.668594	0.584665	0.47659	0.288059	0.0243804	0.906407	0.880341	0.822077	0.751934	0.250286	#DIV/0!	0.930074	0.968786	0.0513401	0.0369827	0.0353828	0.0435376	0.153359	0.480261	0.049392	0.103756	0.360683	0.452468	0.69528	0.268237	0.534223	0.268097	0.401442	0.0382861	0.049958	0.13853	0.867609	0.110582	0.752205
		% Change:	-0.00512391	-0.0099359	0.0158554	0.0309461	0.0336242	0.00226249	0.00379026	-0.00461947	-0.00624387	0.705882	#DIV/0!	0.00643226	0.00206572	12.4175	0.034452	0.458754	0.761004	-0.0877192	-0.0581171	0.34762	0.10464	0.0911386	0.933333	-0.126235	0.0495185	-0.0701428	0.134858	0.125494	0.443182	0.75056	-0.0952099	-0.0109687	0.106712	0.0227404
MEAN	12wk OVX+100ng OGP		15.3017	0.457667	552.543	616.294	1402.98	1.39658	1.0531	0.431206	0.164817	0.000316667	#DIV/0!	0.262468	0.189967	17.121	990.347	0.0235833	10.2736	3.29662	1.95892	0.630467	0.0481	0.517367	0.00116667	-0.970533	3.81427	1.98468	0.0206333	0.517	0.0346167	15.3425	3.10327	2.07828	0.0485333	0.4881
SD	7		0.231466	0.0170958	29.9274	38.8117	27.5211	0.0239021	0.0229334	0.019699	0.00888311	0.000263944	#DIV/0!	0.0214915	0.0151317	11.8439	42.3507	0.00531542	6.43887	0.227509	0.151191	0.151675	0.00470956	0.0406549	0.000768548	0.975287	0.0958144	0.322469	0.00220061	0.0728744	0.00777031	9.66279	0.177655	0.207964	0.00470347	0.0454501
SE			0.0944957	0.00697933	12.2178	15.8448	11.2354	0.00975799	0.00936254	0.00804206	0.00362652	0.000107755	#DIV/0!	0.00877386	0.0061775	4.83525	17.2896	0.00217001	2.62866	0.09288	0.0617236	0.061921	0.00192267	0.0165973	0.000313759	0.398159	0.039116	0.131647	0.000898394	0.0297509	0.00317221	3.94482	0.0725272	0.0849008	0.00192019	0.0185549
CV (%)			1.51269	3.73543	5.4163	6.29761	1.96161	1.71147	2.17771	4.56834	5.38969	83.3509	#DIV/0!	8.18822	7.96547	69.1775	4.27635	22.5389	62.6737	6.90128	7.71811	24.0576	9.79119	7.85804	65.8756	-100.49	2.512	16.2479	10.6653	14.0956	22.4467	62.9805	5.72477	10.0065	9.69122	9.31165
MEDIAN			15.215	0.458	558.192	628.433	1411.48	1.39348	1.05365	0.436269	0.16645	0.0002	#NUM!	0.265785	0.186985	12.9302	1000.69	0.02215	7.8956	3.3154	1.94725	0.58085	0.04715	0.51605	0.0011	-1.23405	3.81345	1.8746	0.02105	0.5319	0.03295	11.7142	3.1035	2.023	0.04755	0.4977
P-value (t-test, 2-tail)	veh vs 100		0.829492	0.213276	0.0242332	0.0256885	0.00247636	0.444526	0.269868	0.203896	0.291169	0.633575	#DIV/0!	0.582072	0.782691	0.0100419	0.00569269	0.0298814	0.138205	0.510728	0.270532	0.0439366	0.33729	0.247807	0.189717	0.362827	0.582718	0.200221	0.0577504	0.159505	0.0331422	0.143061	0.390813	0.304709	0.318294	0.295403
		% Change:	-0.0021272	0.0268162	0.0735744	0.0952031	0.0584386	-0.0126266	-0.0255861	0.0353279	0.0290934	0.303922	#DIV/0!	-0.0329096	-0.0118989	19.2417	0.0663257	0.38959	0.795229	-0.0311884	0.0563696	0.350118	0.048583	-0.0572274	0.814815	-0.35649	0.0155439	0.112948	0.139064	-0.0980461	0.376799	0.785449	-0.0401745	0.0595764	0.05083	-0.0582155
P-value (t-test, 2-tail)	10ng vs 100ng		0.799201	0.0830892	0.0527658	0.0543336	0.0294914	0.363229	0.149701	0.0780741	0.182781	0.51183	#DIV/0!	0.568766	0.807491	0.379897	0.167239	0.756796	0.945924	0.329262	0.199396	0.989714	0.435421	0.170111	0.93061	0.467551	0.410815	0.17825	0.973889	0.160421	0.762196	0.945401	0.342781	0.340044	0.449934	0.285997
		% Change:	0.00301214	0.037121	0.0568182	0.0623282	0.0240072	-0.0148555	-0.0292654	0.0401327	0.0355593	-0.235632	#DIV/0!	-0.0390904	-0.0139359	0.508606	0.0308121	-0.047413	0.019435	0.0619664	0.121551	0.00185391	-0.0507471	-0.135974	-0.0613027	-0.26352	-0.0323716	0.196902	0.00370628	-0.198615	-0.0459974	0.0199301	0.0608267	0.0713274	-0.0504938	-0.0791559
MEAN	12wk OVX+10&100ng OGP		15.2769	0.448846	536.547	596.823	1385.27	1.40792	1.07019	0.422247	0.161769	0.000369231	#DIV/0!	0.268218	0.191412	14.013	974.407	0.0242154	10.1682	3.19304	1.8446	0.629838	0.0494846	0.561208	0.00120769	-1.15752	3.88298	1.82143	0.0205923	0.581067	0.0355154	15.1811	3.00745	2.00378	0.0499231	0.510692
SD	13		0.304368	0.017058	28.1522	34.4543	28.3514	0.0397403	0.0389333	0.0170802	0.00745256	0.000252932	#DIV/0!	0.031766	0.0185624	11.2636	37.7174	0.00639099	4.85847	0.339292	0.289366	0.152248	0.00562744	0.104378	0.00147222	0.814363	0.265251	0.40957	0.00391609	0.154775	0.00929945	7.36551	0.322366	0.249323	0.00582568	0.0679682
SE			0.0844164	0.00473103	7.808	9.5559	7.86327	0.011022	0.0107982	0.00473718	0.00206697	7.01506e-05	#DIV/0!	0.00881031	0.00514827	3.12395	10.4609	0.00177254	1.3475	0.0941027	0.0802558	0.0422259	0.00156077	0.0289493	0.000408321	0.225864	0.0735673	0.118233	0.00108613	0.0446797	0.0025792	2.04283	0.0894081	0.0691497	0.00161575	0.018851
CV (%)			1.99234	3.8004	5.24691	5.77294	2.04663	2.82262	3.63796	4.04506	4.60691	68.5023	#DIV/0!	11.8434	9.69757	80.3796	3.87081	26.3923	47.7812	10.626	15.6872	24.1725	11.3721	18.5989	121.904	-70.3539	6.83112	22.4861	19.0173	26.6363	26.1843	48.5177	10.7189	12.4426	11.6693	13.309
MEDIAN			15.24	0.451	533.457	587.026	1386.88	1.39641	1.05809	0.417278	0.1589	0.0003	#NUM!	0.26357	0.18422	10.607	970.759	0.0221	8.176	3.2847	1.8911	0.5769	0.0475	0.5326	0.0008	-0.9059	3.8348	1.73825	0.0209	0.5751	0.0326	12.0891	3.0627	2.0231	0.0476	0.4957
P-value (t-test, 2-tail)	veh vs 100		0.688298	0.691483	0.0937221	0.0523108	0.00121224	0.753079	0.619191	0.501939	0.632529	0.315112	#DIV/0!	0.835202	0.917935	0.0115882	0.00855516	0.0153235	0.0492361	0.195116	0.935896	0.0221605	0.138307	0.771713	0.347226	0.417128	0.302977	0.830637	0.139207	0.906471	0.0169957	0.0538174	0.149523	0.698545	0.138441	0.801023
		% Change:	-0.00374081	0.00702663	0.0424949	0.0606032	0.045077	-0.00460942	-0.00976805	0.0138178	0.0100657	0.520362	#DIV/0!	-0.0117255	-0.0043795	15.5671	0.049163	0.426832	0.7768	-0.061628	-0.00527707	0.348773	0.0787677	0.022662	0.878632	-0.232506	0.0338379	0.0214027	0.136799	0.0137241	0.412544	0.766663	-0.0698089	0.0215906	0.0809203	-0.0146238
MEAN	12wk OVX + cbd		15.5886	0.484571	481.838	532.855	1253.39	1.44473	1.08737	0.433676	0.170371	0	0	0.302431	0.210987	22.3876	779.865	0.0334714	11.3854	3.14614	1.87476	0.774714	0.0576857	0.540243	0.00201429	-1.48924	3.68526	1.67896	0.0263143	0.610571	0.0487571	16.8039	2.95734	1.98587	0.0583	0.507629
SD	7		0.152472	0.0151312	15.3108	24.6474	20.5684	0.0388986	0.0421308	0.0172369	0.00748726	0	0	0.0281953	0.0139306	6.52395	13.2672	0.00858132	3.01601	0.490729	0.218352	0.130581	0.0105719	0.0746683	0.001181	0.601036	0.362268	0.284286	0.0014938	0.12008	0.012932	4.32952	0.471993	0.194164	0.0104058	0.0574595
SE			0.0576289	0.00571905	5.78693	9.31583	7.77413	0.0147023	0.015924	0.00651494	0.00282992	0	0	0.0106568	0.00526527	2.46582	5.01451	0.00324343	1.13994	0.185478	0.0825292	0.0493549	0.0039958	0.028222	0.000446376	0.22717	0.136924	0.10745	0.000564602	0.0453859	0.00488783	1.6364	0.178397	0.073387	0.00393301	0.0217176
CV (%)			0.978099	3.12259	3.17758	4.62553	1.64102	2.69246	3.87455	3.97461	4.39467	#DIV/0!	#DIV/0!	9.32287	6.60258	29.1409	1.70121	25.6377	26.49	15.5978	11.6469	16.8553	18.3267	13.8213	58.6312	-40.3585	9.8302	16.9323	5.67675	19.6668	26.5233	25.765	15.96	9.77726	17.8487	11.3192
MEDIAN			15.67	0.492	488.289	534.965	1246.65	1.45613	1.09392	0.433031	0.1701	0	0	0.30876	0.21128	20.0207	782.449	0.0363	10.7337	3.2941	1.9438	0.7251	0.0591	0.5106	0.0019	-1.5249	3.4843	1.7345	0.0263	0.5839	0.0529	16.1755	2.9777	2.02	0.0597	0.4912
P-value (t-test, 2-tail)	12WK cbd VS 12WK ovx		0.0633701	0.00047932	0.00754481	0.0957381	0.00138011	0.231528	0.802457	0.105996	0.0168325	0.0382212	#DIV/0!	0.0826164	0.0276229	5.70239e-05	1.74131e-09	0.000657854	0.00829364	0.268302	0.848961	0.000415557	0.0153436	0.806506	0.0174317	0.967688	0.67298	0.44352	2.10587e-06	0.497811	0.000950636	0.00935447	0.222506	0.812903	0.0126199	0.72358
		% Change:	0.0165828	0.0871795	-0.0638033	-0.0530738	-0.0544127	0.0214081	0.0061269	0.0412573	0.0637766	-1	#DIV/0!	0.114338	0.0974379	25.4683	-0.160304	0.972222	0.989508	-0.0754098	0.0109855	0.659019	0.257552	-0.0155412	2.13333	-0.01256	-0.0188048	-0.0584935	0.452681	0.0651979	0.939205	0.955509	-0.085308	0.0124618	0.262295	-0.0205353
MEAN	6wk OVX		15.16	0.414571	479.501	535.622	1334.22	1.40267	1.09941	0.385612	0.146229	0.000442857	#DIV/0!	0.244791	0.17737	27.796	922.078	0.0228714	15.8067	3.35927	1.94334	0.692357	0.0425857	0.545686	0.0013	-0.7837	3.97721	1.64582	0.0180571	0.634533	0.0340571	24.0374	3.26279	2.39766	0.0429143	0.425429
SD	7		0.299889	0.00879123	10.6543	17.2803	10.5613	0.00935526	0.0131483	0.0116483	0.00539126	0.000431498	#DIV/0!	0.00763529	0.00419646	9.77069	26.2164	0.00501588	5.14906	0.270817	0.495022	0.179084	0.00403131	0.134631	0.00186369	0.866006	0.351532	0.384828	0.00426218	0.131673	0.00742739	8.09488	0.228576	0.368346	0.00375386	0.0584634
SE			0.113347	0.00332277	4.02693	6.53133	3.9918	0.00353596	0.00496961	0.00440264	0.00203771	0.000163091	#DIV/0!	0.00288587	0.00158611	3.69297	9.90887	0.00189582	1.94616	0.102359	0.187101	0.0676873	0.00152369	0.0508856	0.000704408	0.32732	0.132867	0.157106	0.00161095	0.0537551	0.00280729	3.05958	0.0863938	0.139222	0.00141882	0.0220971
CV (%)			1.97816	2.12056	2.22194	3.2262	0.791573	0.666962	1.19594	3.02073	3.68687	97.435	#DIV/0!	3.1191	2.36594	35.1514	2.84319	21.9308	32.5751	8.06177	25.4727	25.8658	9.46633	24.6718	143.361	-110.502	8.83865	23.3822	23.6039	20.7511	21.8086	33.6763	7.00556	15.3627	8.74733	13.7422
MEDIAN			15.28	0.416	477.038	537.929	1335.26	1.39909	1.09707	0.387885	0.1463	0.0003	#NUM!	0.24548	0.17606	25.2158	922.293	0.0242	14.7867	3.5181	1.8601	0.7081	0.0406	0.5415	0.0003	-0.8149	3.8691	1.5091	0.0177	0.66695	0.0364	22.2641	3.3309	2.2321	0.041	0.4488
P-value (t-test, 2-tail)	12WK cbd VS 6 WK ovx		0.00556576	1.93467e-07	0.746032	0.811926	8.27332e-07	0.0166078	0.4843	5.23536e-05	1.59773e-05	0.0187669	#DIV/0!	0.000214468	5.22902e-05	0.246643	2.33689e-08	0.0154169	0.0735971	0.334249	0.74312	0.344951	0.00413905	0.927019	0.408485	0.101965	0.151885	0.861596	0.000407019	0.737891	0.0228886	0.059122	0.149271	0.0225293	0.00314986	0.0210589
		% Change:	-0.0274927	-0.144458	-0.0048495	0.00519361	0.0644837	-0.0291119	0.0110717	-0.110828	-0.141707	#DIV/0!	#DIV/0!	-0.190589	-0.159333	0.241581	0.182355	-0.316688	0.388328	0.0677428	0.0365838	-0.106306	-0.261763	0.0100748	-0.35461	-0.473759	0.079223	-0.0197387	-0.313789	0.039245	-0.301494	0.430467	0.103283	0.207358	-0.263906	-0.161929
MEAN	6wkSham		15.02	0.46625	541.042	561.464	1344.9	1.41227	1.09394	0.399597	0.153225	0.0006	#DIV/0!	0.260648	0.19019	73.3468	955.509	0.04935	39.4971	3.36458	2.9282	1.45507	0.045775	0.34255	0.009225	2.50455	3.48133	2.42895	0.0236	0.412825	0.0702	59.3853	3.05625	3.28292	0.04735	0.303825
SD	4		0.3879	0.0335596	43.7222	46.0167	20.6802	0.0115867	0.0214768	0.0297535	0.0137602	0.000355903	#DIV/0!	0.022203	0.0178373	10.8478	27.7395	0.00765963	8.16982	0.0704063	0.0532525	0.145671	0.0036022	0.00498698	0.0018518	1.90243	0.0994443	0.0752137	0.00174929	0.0137085	0.0112839	11.7063	0.123088	0.164858	0.00363364	0.0140874
SE			0.19395	0.0167798	21.8611	23.0084	10.3401	0.00579334	0.0107384	0.0148767	0.00688009	0.000177951	#DIV/0!	0.0111015	0.00891866	5.4239	13.8697	0.00382982	4.08491	0.0352032	0.0266263	0.0728356	0.0018011	0.00249349	0.0009259	0.951215	0.0497222	0.0376069	0.000874643	0.00685424	0.00564196	5.85313	0.061544	0.0824288	0.00181682	0.00704372
CV (%)			2.58256	7.19778	8.08112	8.19584	1.53767	0.820427	1.96325	7.44587	8.98037	59.3171	#DIV/0!	8.5184	9.37868	14.7898	2.90311	15.521	20.6846	2.09258	1.81861	10.0112	7.86936	1.45584	20.0737	75.959	2.85651	3.09655	7.41223	3.32065	16.0739	19.7124	4.02742	5.02167	7.674	4.63669
MEDIAN			15.005	0.478	551.818	567.143	1347.3	1.4109	1.0959	0.402557	0.15535	0.0007	#NUM!	0.267185	0.19599	75.5019	956.022	0.0509	39.4933	3.36625	2.92705	1.48555	0.04645	0.34235	0.0091	2.882	3.46475	2.4289	0.0237	0.41075	0.07195	60.0344	3.0677	3.2613	0.04825	0.30555
P-value (t-test, 2-tail)	6WK Sham VS 6 WK ovx		0.517778	0.00315613	0.00509643	0.203717	0.276961	0.165409	0.607439	0.285178	0.250232	0.55397	#DIV/0!	0.109688	0.0921371	5.27787e-05	0.0771539	6.2631e-05	0.000207054	0.970799	0.00375218	5.00697e-05	0.22366	0.0162928	7.91627e-05	0.00303569	0.0242784	0.00427857	0.0373367	0.0110409	0.000114248	0.000211199	0.133335	0.0015383	0.0891195	0.00307962
		% Change:	-0.00923483	0.124655	0.128343	0.0482465	0.00800688	0.00684963	-0.00497684	0.0362661	0.0478458	0.354839	#DIV/0!	0.0647738	0.0722783	1.63875	0.0362564	1.15771	1.49875	0.00157879	0.506785	1.10162	0.074891	-0.372258	6.09615	-4.1958	-0.124683	0.475833	0.306962	-0.349404	1.06124	1.47054	-0.0633004	0.369222	0.103362	-0.285838
MEAN	ovx cb2ko ogp 12wk		16.0011	0.461333	546.078	558.53	1378.05	1.59367	1.23206	0.402259	0.1734	0.000277778	0.00333333	0.428704	0.273133	40.389	977.117	0.0444889	24.893	2.79361	2.11477	1.13646	0.0508	0.514967	0.00605556	1.75341	3.92683	1.88119	0.0271	0.617175	0.0666444	37.7767	2.58867	2.43621	0.0514778	0.426056
SD	10		0.250172	0.02755	39.3732	37.1339	14.6695	0.0620809	0.0578484	0.0239846	0.0123959	0.000281859	0.0057735	0.0668317	0.0342393	19.6343	31.1424	0.0146668	11.7328	0.251503	0.575286	0.365941	0.0059165	0.15539	0.00784683	4.88289	0.488468	0.669952	0.0104754	0.265327	0.0202369	16.1518	0.188166	0.462168	0.00609483	0.0906675
SE			0.0833907	0.00918332	13.1244	12.378	4.88984	0.0206936	0.0192828	0.00799488	0.00413196	9.3953e-05	0.00333333	0.0222772	0.0114131	6.54475	10.3808	0.00488895	3.91092	0.0838342	0.191762	0.12198	0.00197217	0.0517967	0.00261561	1.62763	0.162823	0.236864	0.00349182	0.0938072	0.00674562	5.38394	0.0627219	0.154056	0.00203161	0.0302225
CV (%)			1.56347	5.97181	7.21018	6.64851	1.06451	3.89546	4.69526	5.96249	7.14871	101.469	173.205	15.5892	12.5358	48.6129	3.18717	32.9674	47.1328	9.00278	27.2033	32.2002	11.6467	30.1748	129.581	278.479	12.4392	35.6133	38.6548	42.9905	30.3654	42.756	7.26883	18.9708	11.8397	21.2807
MEDIAN			15.97	0.459	534.235	569.948	1383.97	1.61002	1.24608	0.407416	0.1738	0.0003	0	0.44274	0.27371	36.0256	976.479	0.042	23.482	2.9227	1.8835	1.0865	0.049	0.5341	0.0021	-0.3105	3.8342	1.90195	0.0268	0.53275	0.062	36.2069	2.5355	2.3259	0.0492	0.4388
P-value (t-test, 2-tail)	12wk cb2ko ovx vs.cb2ko ogp		0.595949	0.0876007	0.220573	0.0915547	0.132314	0.806619	0.598716	0.0740354	0.0432516	0.808061	#DIV/0!	0.486764	0.408971	0.960739	0.400392	0.892196	0.624569	0.461805	0.193117	0.615537	0.322632	0.277513	0.495257	0.64953	0.131494	0.0518928	0.0447282	0.0995831	0.933778	0.627212	0.636699	0.501999	0.374563	0.518634	#DIV/0!
		% Change:	0.00383382	-0.0442649	-0.0364443	-0.0459612	0.00851983	-0.00416886	0.0110664	-0.0429303	-0.0563265	0.111111	#DIV/0!	-0.045461	-0.0429068	0.0109223	0.0100378	0.0201534	0.119105	0.0459085	0.177848	0.0779243	-0.0402418	-0.134306	0.491516	1.02031	-0.17911	0.433078	-0.276368	-0.267109	0.0116036	0.11062	0.024472	0.0651826	-0.0370786	-0.0652987	#DIV/0!
MEAN	ovx cb2ko 12wk		15.94	0.4827	566.732	585.437	1366.41	1.60034	1.21858	0.420302	0.18375	0.00025	#DIV/0!	0.449122	0.285378	39.9527	967.407	0.04361	22.2437	2.67099	1.79545	1.0543	0.05293	0.59486	0.00406	0.86789	4.78363	1.31269	0.03745	0.84211	0.06588	34.014	2.52683	2.28713	0.05346	0.45582
SD	4		0.242487	0.023847	31.3344	28.2804	17.1427	0.0549195	0.0517979	0.0171044	0.0080207	0.000206828	#DIV/0!	0.0583911	0.0288019	18.4392	16.4905	0.0131897	11.4206	0.425557	0.450142	0.334262	0.00282884	0.154639	0.0043154	3.40511	1.55046	0.479256	0.0103229	0.275768	0.0192658	16.9091	0.341244	0.482463	0.00304237	0.104582
SE			0.0766812	0.00754107	9.90881	8.94305	5.421	0.0173671	0.0163799	0.00540887	0.00253637	6.54047e-05	#DIV/0!	0.0184649	0.00910797	5.83097	5.21476	0.00417094	3.61152	0.134573	0.142347	0.105703	0.000894558	0.0489011	0.00136465	1.07679	0.490298	0.151554	0.0032644	0.0872054	0.00609238	5.34711	0.107911	0.152568	0.000962081	0.0330716
CV (%)			1.52125	4.94033	5.52896	4.83065	1.25458	3.43173	4.25069	4.06954	4.36501	82.7312	#DIV/0!	13.0012	10.0926	46.1525	1.70461	30.2446	51.3433	15.9326	25.0713	31.7046	5.34449	25.9958	106.291	392.343	32.4117	36.5095	27.5646	32.7472	29.2438	49.712	13.5048	21.0947	5.69092	22.9436
MEDIAN			15.935	0.481	571.179	593.894	1369.8	1.61195	1.22223	0.425192	0.18365	0.0002	#NUM!	0.45796	0.28739	36.1624	966.011	0.039	19.8582	2.67265	1.7937	0.91935	0.0524	0.55705	0.00205	-0.60085	4.59425	1.3227	0.0375	0.7594	0.0596	30.7767	2.5459	2.1675	0.0524	0.46025
P-value (t-test, 2-tail)	cb2ko OVX vs cb2ko Sham		0.611615	0.00017743	0.000432611	0.0405651	0.637581	0.0476209	0.570463	0.010742	0.000820689	0.616815	#DIV/0!	0.00748279	0.00142355	4.30245e-05	0.0004491	0.000117861	0.000145628	0.0135872	1.53384e-06	3.23449e-05	0.501089	8.00208e-05	3.55752e-06	0.000230155	0.0119543	2.87007e-06	0.708522	0.000113317	0.000236179	0.000344773	0.0896419	1.00452e-05	0.0763513	0.000203745
		% Change:	0.00365193	-0.077937	-0.0848876	-0.0461277	0.00289225	-0.0279232	-0.00938592	-0.048243	-0.0758437	-0.21875	#DIV/0!	-0.149606	-0.144453	-0.498815	-0.0322626	-0.39439	-0.574893	-0.137255	-0.383824	-0.432635	-0.0158051	0.737274	-0.808851	-0.946454	0.41318	-0.465728	0.0417246	1.06142	-0.360699	-0.518271	-0.0869234	-0.309656	-0.0441623	0.53047
MEAN	sham cb2ko 12wk		15.882	0.5235	619.304	613.748	1362.47	1.64631	1.23012	0.441607	0.19883	0.00032	0.0124333	0.528134	0.333562	79.7163	999.658	0.07201	52.3248	3.09592	2.91386	1.85824	0.05378	0.34241	0.02124	16.2084	3.38501	2.45697	0.03595	0.40851	0.10305	70.6082	2.76738	3.31303	0.05593	0.29783
SD	4		0.259178	0.0135667	22.6709	29.0896	19.5553	0.0407485	0.0361658	0.0163744	0.00877864	0.00038239	0.0215352	0.0589116	0.0284587	14.5146	17.1894	0.0127801	16.2318	0.245379	0.228387	0.320102	0.00270629	0.0298693	0.00704844	10.0197	0.31527	0.251981	0.00702855	0.0447016	0.01702	20.1371	0.251711	0.232755	0.00282845	0.0256631
SE			0.0819593	0.00429017	7.16918	9.19895	6.18394	0.0128858	0.0114366	0.00517803	0.00277605	0.000120922	0.0124333	0.0186295	0.00899943	4.58993	5.43576	0.00404144	5.13294	0.0775956	0.0722222	0.101225	0.000855804	0.00944551	0.00222891	3.1685	0.0996972	0.0796833	0.00222262	0.0141359	0.0053822	6.3679	0.0795979	0.0736036	0.000894433	0.00811538
CV (%)			1.6319	2.59154	3.66071	4.73967	1.43528	2.47514	2.94002	3.7079	4.41515	119.497	173.205	11.1547	8.53175	18.2079	1.71953	17.7477	31.0212	7.92588	7.83794	17.2261	5.03215	8.72326	33.1847	61.8175	9.31372	10.2557	19.5509	10.9426	16.5163	28.5194	9.09563	7.02544	5.05712	8.61669
MEDIAN			15.875	0.527	628.444	624.476	1357.56	1.62558	1.21681	0.450917	0.2007	0.0002	0	0.51847	0.331505	77.1439	1002.96	0.0691	52.3046	3.1183	2.9157	1.82285	0.05505	0.3401	0.0204	17.286	3.3298	2.42995	0.03425	0.41145	0.1001	67.0701	2.8025	3.26915	0.05645	0.29745
	cb2ko sham vs cb2ko OVX OGP		0.32355	7.31431e-06	0.000101717	0.00207579	0.0683828	0.0412776	0.930399	0.000581534	7.16583e-05	0.789489	0.518613	0.00307209	0.000601317	0.000109383	0.0639159	0.000415448	0.000631744	0.0168388	0.000811488	0.000261982	0.168666	0.00304396	0.000355202	0.00109984	0.00987986	0.0227538	0.0432789	0.0255464	0.000529568	0.0011773	0.100665	5.76862e-05	0.0530337	0.000487678
			0.00749976	-0.118752	-0.118238	-0.0899688	0.0114367	-0.0319756	0.00157659	-0.0891022	-0.127898	-0.131944	-0.731903	-0.188266	-0.181162	-0.493341	-0.0225486	-0.382185	-0.52426	-0.0976475	-0.274239	-0.388424	-0.0554109	0.503948	-0.714899	-0.891821	0.160066	-0.234347	-0.246175	0.510795	-0.353281	-0.464982	-0.0645785	-0.264658	-0.0796035	0.430533
MEAN	sham (cbd2) 12wk		15.0214	0.466286	546.491	592.135	1359.49	1.39731	1.05886	0.425725	0.163114	0.0005	#DIV/0!	0.261903	0.192256	38.3517	924.267	0.0342571	27.3343	3.36447	2.6003	1.08011	0.0403857	0.3851	0.00677143	0.504071	3.44563	2.30019	0.0237571	0.432057	0.0488429	41.6931	3.1473	2.84637	0.0416143	0.353314
SD	8		0.163445	0.00994509	14.8972	18.5028	18.8812	0.0239084	0.0213638	0.01117	0.00545601	0.000382971	#DIV/0!	0.0204898	0.0142986	10.6043	22.072	0.0090675	13.2031	0.16097	0.0820936	0.234984	0.00384553	0.0154156	0.00164186	1.45053	0.0717259	0.123976	0.00159568	0.0216053	0.0141317	20.9734	0.219874	0.214377	0.00402882	0.026782
SE			0.0617764	0.00375889	5.63061	6.99339	7.13644	0.00903653	0.00807474	0.00422186	0.00206218	0.000144749	#DIV/0!	0.00774443	0.00540438	4.00806	8.34243	0.00342719	4.99029	0.060841	0.0310285	0.0888154	0.00145347	0.00582654	0.000620566	0.548248	0.0271099	0.0468584	0.00060311	0.00816604	0.0053413	7.92718	0.0831045	0.0810268	0.00152275	0.0101227
CV (%)			1.08808	2.13283	2.72597	3.12476	1.38884	1.71103	2.01762	2.62375	3.3449	76.5942	#DIV/0!	7.82345	7.4373	27.6502	2.38805	26.4689	48.3022	4.78441	3.15708	21.7554	9.522	4.00301	24.2469	287.762	2.08165	5.38982	6.71663	5.00057	28.9331	50.3041	6.98611	7.53158	9.68135	7.58023
MEDIAN			15.04	0.466	544.634	586.642	1358.11	1.386	1.05971	0.424997	0.1664	0.0003	#NUM!	0.25321	0.1859	41.6357	925.303	0.038	29.0796	3.3028	2.6222	1.1619	0.0416	0.3844	0.0062	0.3503	3.4248	2.3108	0.0237	0.426	0.0539	43.9904	3.1101	2.9377	0.0428	0.3392
P-value (t-test, 2-tail)			0.124184	0.0537604	0.227701	0.438516	0.0417719	0.631295	0.334657	0.0940308	0.26903	0.502096	#DIV/0!	0.995632	0.429329	0.000263092	0.00621364	0.00314261	0.0037278	0.225734	6.68177e-06	7.46695e-05	0.0215707	0.000131942	2.44113e-07	0.00539662	0.00386092	0.000642916	0.00090388	0.00202542	0.00858872	0.00459446	0.59346	9.35712e-06	0.0370732	5.34295e-05
		% Change:	-0.0132088	0.0273439	0.0205566	0.0106893	-0.0140892	-0.00609065	-0.014089	0.0222535	0.0217793	0.290323	#DIV/0!	-0.000280151	0.0322385	1.81955	-0.0450218	0.650947	1.65857	0.0363261	0.354711	1.04291	-0.181647	-0.272349	9.22102	-1.29094	-0.120556	0.303468	0.430076	-0.2561	0.578759	1.69058	0.0177655	0.397592	-0.162058	-0.291067
MEAN	ovx cbd (cbd2) 12wk		15.385	0.453125	539.007	589.72	1385.8	1.41234	1.07913	0.416386	0.160325	0.000375	#DIV/0!	0.267631	0.189724	16.5782	959.648	0.022025	13.1464	3.1109	1.73942	0.569913	0.0459375	0.582963	0.0003875	-1.72819	3.89486	1.41331	0.0184	0.750213	0.0330375	19.8525	2.9839	1.99535	0.0461125	0.503938
SD	8		0.199571	0.0096279	15.1516	21.2316	15.3498	0.0398142	0.0408285	0.0131003	0.00435914	0.000271241	#DIV/0!	0.0258922	0.0128098	7.30503	28.2883	0.0052317	4.16078	0.306424	0.181707	0.101817	0.00445195	0.0651196	0.000195941	0.468974	0.406221	0.342301	0.00121185	0.203367	0.00803171	6.34636	0.28544	0.0741934	0.004437	0.0178602
SE			0.070559	0.00340398	5.3569	7.50651	5.42697	0.0140765	0.014435	0.00463167	0.00154119	9.5898e-05	#DIV/0!	0.00915427	0.00452894	2.58272	10.0014	0.00184969	1.47106	0.108337	0.064243	0.0359977	0.001574	0.0230232	6.92756e-05	0.165807	0.143621	0.121022	0.000428452	0.0719012	0.00283964	2.24378	0.100918	0.0262313	0.00156872	0.00631455
CV (%)			1.29718	2.12478	2.81102	3.60029	1.10765	2.81903	3.78346	3.1462	2.71894	72.3308	#DIV/0!	9.67458	6.7518	44.0642	2.94777	23.7535	31.6495	9.85001	10.4464	17.8654	9.69131	11.1705	50.5654	-27.1367	10.4297	24.2198	6.58612	27.108	24.3109	31.9676	9.56599	3.71831	9.62212	3.54414
MEDIAN			15.3	0.4525	538.818	590.815	1382.87	1.4142	1.07703	0.417772	0.1602	0.0004	#NUM!	0.27078	0.19133	14.9533	967.243	0.02205	13.3738	3.09075	1.75225	0.5878	0.04675	0.57235	0.00035	-1.68315	3.7864	1.4269	0.01835	0.7079	0.03295	20.1351	2.9531	1.9977	0.04685	0.5037
P-value (t-test, 2-tail)			0.207015	0.894209	0.680973	0.659038	0.37128	0.751271	0.789656	0.989972	0.799378	0.923847	#DIV/0!	0.686825	0.614955	0.472464	0.574134	0.630298	0.161919	0.307653	0.109536	0.499395	0.323347	0.132883	0.268352	0.992227	0.904559	0.0609365	0.261253	0.0851443	0.604897	0.165416	0.370446	0.637983	0.305268	0.805069
		% Change:	0.010675	-0.00165244	0.00657992	0.00656876	0.00498623	0.00459874	0.00478464	-0.000170767	0.00430663	-0.0322581	#DIV/0!	0.0215859	0.0186442	0.218798	-0.00846508	0.0614458	0.278642	-0.0417791	-0.0937899	0.0779251	-0.0691489	0.101514	-0.415094	-0.00251077	-0.00589592	-0.199105	0.1076	0.291688	0.0678788	0.281136	-0.0350743	-0.0202664	-0.0714825	0.0111613
MEAN	ovx veh (cbd2) 12wk		15.2225	0.453875	535.483	585.872	1378.92	1.40587	1.07399	0.416458	0.159637	0.0003875	0	0.261976	0.186251	13.6021	967.841	0.02075	10.2816	3.24654	1.91945	0.528713	0.04935	0.529237	0.0006625	-1.73254	3.91796	1.76467	0.0166125	0.5808	0.0309375	15.496	3.09236	2.03662	0.0496625	0.498375
SD	8		0.284341	0.012357	18.2723	11.5003	14.409	0.0401837	0.0344981	0.00869068	0.00611157	0.000241646	#DIV/0!	0.0289704	0.0141558	8.75165	28.6617	0.00513225	3.57801	0.19342	0.236147	0.133701	0.00831144	0.0694869	0.000645728	1.14853	0.348352	0.27122	0.00414503	0.0958318	0.00783744	5.53276	0.168605	0.231119	0.00832723	0.0599491
SE			0.10053	0.00436887	6.46023	4.06596	5.09435	0.0142071	0.0121969	0.00307262	0.00216077	8.54348e-05	#DIV/0!	0.0102426	0.00500483	3.09417	10.1335	0.00181452	1.26502	0.0683842	0.0834905	0.0472703	0.00293854	0.0245673	0.000228299	0.406066	0.123161	0.110725	0.00146549	0.0391232	0.00277096	1.95613	0.0596109	0.081713	0.00294412	0.0211952
CV (%)			1.8679	2.72256	3.4123	1.96293	1.04495	2.85827	3.21214	2.08681	3.8284	62.3603	#DIV/0!	11.0584	7.60038	64.3406	2.96141	24.7337	34.8002	5.95772	12.3028	25.2879	16.8418	13.1296	97.4683	-66.2916	8.89114	15.3695	24.9513	16.5	25.3332	35.7045	5.45231	11.3481	16.7676	12.0289
MEDIAN			15.255	0.455	534.987	582.468	1381.44	1.38906	1.05912	0.416423	0.1592	0.00045	0	0.25127	0.18312	12.7639	972.99	0.0214	8.6818	3.21445	1.95155	0.4881	0.0498	0.51265	0.00045	-1.2303	3.82105	1.7641	0.01825	0.5706	0.0318	12.9154	3.1347	2.05395	0.05025	0.4856
P-value (t-test, 2-tail)			0.120936	0.699163	0.625487	0.544968	0.701218	0.91977	0.775323	0.475903	0.637793	0.358897	#DIV/0!	0.907872	0.769247	0.456299	0.260322	0.483383	0.231199	0.211152	0.281429	0.477757	0.639964	0.16874	0.710818	0.33534	0.714567	0.273504	0.812928	0.278731	0.48158	0.241846	0.282081	0.848562	0.629262	0.58097
		% Change:	-0.0105622	0.00165517	-0.00653691	-0.00652589	-0.00496149	-0.00457769	-0.00476186	0.000170796	-0.00428816	0.0333333	#DIV/0!	-0.0211298	-0.0183029	-0.179519	0.00853735	-0.0578888	-0.21792	0.0436007	0.103497	-0.0722918	0.0742857	-0.0921586	0.709677	0.00251709	0.00593089	0.248603	-0.0971467	-0.225819	-0.0635641	-0.219443	0.0363492	0.0206856	0.0769856	-0.0110381
SPECIMEN	Sample#	Resolution	Length	BV/TV	vBMD	vBMD	TMD	Dia.Dia	Med.Dia	BA/TA	Cort.Th	Po.V	Po.diam	Polar	Areal	vBMD	Mater prop	BV/TV	Conn.D	SMI	Tb.N (3D)	Tb.N (Pl)	Tb.Th (3D)	Sp (3D)	BV/TV	Conn.D	SMI	Tb.N (3D)	Tb.Th (3D)	Sp (3D)	BV/TV	Conn.D	SMI	Tb.N (3D)	Tb.Th (3D)	Sp (3D)
[name]	[name]	[micrometer]	[mm]	[%]	[mg HA/ccm]	[mg HA/ccm]	[mg HA/ccm]	[mm]	[mm]	[1]	[mm]	[%]	[mm]	[mm^4]	[mm^3]	[mg HA/ccm]	[mg HA/ccm]	[%]	[1/mm3]	[1]	[mm-1]	[mm-1]	[mm]	[mm]	[%]	[1/mm3]	[1]	[mm-1]	[mm]	[mm]	[%]	[1/mm3]	[1]	[mm-1]	[mm]	[mm]
PROJECT
					Here CORT and TRAB parameters are well aligned for scripts after March 2014!!!
BITYA_OGPRCC_V_1784	2722		15.47	0.439	499.429	543.569	1301.61	1.38988	1.0617	0.416488	0.1623	0	! 0.000	0.25238	0.18394	-2.3754	929.079	0.016	3.087	3.8289	2.0074	0.4229	0.0478	0.5015	0.0003	-2.5639	3.7915	1.6927	0.018	0.5906	0.0236	4.5964	3.7034	2.1406	0.048	0.4714
BITYA_OGPRCC_V_1758	2723		15.44	0.421	477.427	505.032	1279.47	1.50978	1.1869	0.381978	0.1514	0.0001	! 0.000	0.3306	0.21302	3.6375	893.411	0.0153	3.177	3.4089	1.87	0.47	0.0433	0.5364	0.0005	-1.3185	3.6426	1.6101	0.0172	0.6244	0.0235	4.9407	3.2648	2.0686	0.0436	0.483
BITYA_OGPRCC_V_1_2	2725		15.24	0.457	518.834	559.148	1295.59	1.391	1.05545	0.424269	0.1603	0.0002	! 0.010	0.25475	0.18777	7.054	916.916	0.0202	12.9276	2.9732	1.6554	0.5329	0.0461	0.608	0.0006	0	3.6195	1.9254	0.0177	0.5213	0.0302	19.4944	2.7749	1.6874	0.0463	0.6015
BITYA_OGPRCC_V_2_1	2726		14.82	0.452	512.958	548.216	1296.14	1.3921	1.06884	0.410499	0.1536	0.0004	! 0.000	0.25019	0.18476	-7.8417	929.762	0.012	2.9233	3.5478	1.6419	0.2996	0.0489	0.6084	0.0003	-1.3178	3.3449	! 2.634	0.0161	! 0.379	0.0174	4.2794	3.4049	1.7931	0.0491	0.5572
BITYA_OGPRCC_V_2_2	2727		15.69	0.46	540.153	618.594	1361.32	1.3816	1.02666	0.447815	0.1689	0.0001	! 0.000	0.26491	0.18825	9.2405	957.777	0.0248	5.7643	3.529	2.1106	0.6388	0.0491	0.4761	0.0019	-0.4007	3.9712	2.0152	0.022	0.5075	0.0363	8.6624	3.207	2.191	0.0498	0.4552
BITYA_OGPRCC_V_1785	2728		15.14	0.46	541.246	579.51	1364.19	1.37765	1.05006	0.419034	0.1589	0.0008	! 0.000	0.24296	0.17693	-7.295	927.985	0.0141	4.1855	3.5545	1.853	0.406	0.0459	0.5704	0.0007	-2.6686	3.971	1.6615	0.0196	0.6385	0.0206	6.1961	3.3766	1.9214	0.0464	0.543
BITYA_OGPRCC_V_1760	2729		15.54	0.431	512.685	584.976	1380.32	1.4591	1.11565	0.415364	0.1657	0.0001	! 0.000	0.30401	0.21111	3.5009	946.297	0.0164	7.9945	2.9769	1.8424	0.4986	0.04	0.5406	0.0002	-2.2878	3.9505	1.7947	0.0162	0.5569	0.0244	11.9822	2.9005	1.9279	0.0401	0.5166
BITYA_OGPRCC_10ng_1799	2730		15.54	0.461	552.725	602.058	1386.88	1.44328	1.09534	0.424029	0.1675	0.0006	! 0.000	0.30027	0.21211	28.9191	1000.69	0.0378	11.4778	3.3596	2.2547	0.9125	0.0575	0.4451	0.0056	-2.1378	3.7084	2.382	0.0257	0.4231	0.0546	17.462	2.8028	2.264	0.0592	0.4471
BITYA_OGPRCC_10ng_1779	2731		15.09	0.44	519.518	576.777	1354.9	1.44765	1.10513	0.417228	0.1644	0.0006	! 0.010	0.29539	0.20347	11.017	913.09	0.0221	10.836	2.6982	1.5004	0.5246	0.053	0.6761	0.0004	-0.8128	3.6912	1.6778	0.0173	0.5963	0.0321	15.8752	2.5088	1.6064	0.0533	0.6344
BITYA_OGPRCC_10ng_1759	2733		15.5	0.423	495.603	539.06	1348.89	1.50363	1.17259	0.391845	0.1568	0.0005	! 0.000	0.34025	0.22763	10.607	938.781	0.0263	16.0589	2.8665	1.9163	0.789	0.0431	0.523	0.0008	-1.2379	4.3508	1.4494	0.0215	0.689	0.0396	24.4672	2.7539	2.2292	0.0434	0.447
BITYA_OGPRCC_10ng_1777	2734		15.65	0.452	535.097	587.026	1382.1	1.39185	1.06468	0.414875	0.1566	0.0003	! 0.000	0.25302	0.1818	21.2663	951.49	0.0312	11.8934	2.7131	1.4695	0.6547	0.06	0.6882	0.0012	-0.7928	3.4204	1.0026	0.0293	0.9999	0.046	17.7434	2.5754	1.6665	0.0604	0.6107
BITYA_OGPRCC_10ng_1793	2735		15.25	0.428	515.281	593.996	1400.68	1.3986	1.06932	0.41544	0.1589	0.0007	! 0.000	0.25251	0.18422	6.3707	987.841	0.017	6.2575	3.6884	1.8911	0.4928	0.0464	0.5326	0.0003	-2.4392	4.0759	1.7344	0.0169	0.5753	0.0249	9.2115	3.5876	2.0269	0.0466	0.4957
BITYA_OGPRCC_10ng_1763	2736		15.22	0.451	533.457	586.889	1363.92	1.36956	1.04187	0.421285	0.1584	0	! 0.000	0.23469	0.17062	5.6874	970.759	0.0213	6.3699	3.5207	1.9542	0.5421	0.0497	0.5132	0.0004	-0.9059	4.3525	1.7029	0.0172	0.5872	0.0311	9.3623	3.3781	2.0947	0.0499	0.4788
BITYA_OGPRCC_10ng_cage4	2737		14.54	0.434	508.175	575.137	1353.26	1.36895	1.045	0.417278	0.1515	0.0002	! 0.000	0.23589	0.16871	-4.4252	962.56	0.0176	7.6509	2.8833	1.2401	0.4894	0.045	0.8133	0	-0.8982	3.9939	! 1.724	0.016	! 0.579	0.0257	11.1774	2.8707	1.6917	0.045	0.5967
BITYA_OGPRCC_100ng_1726	2738		15.14	0.461	559.558	628.16	1406.69	1.37469	1.02966	0.438982	0.1662	0.0002	! 0.000	0.24921	0.18105	36.8452	983.741	0.0334	21.8267	3.3666	2.1751	0.9343	0.0468	0.4633	0.0025	0.8177	3.7921	1.7421	0.0209	0.5749	0.0487	32.5553	3.1328	2.4828	0.0475	0.4034
BITYA_OGPRCC_100ng_1797
BITYA_OGPRCC_100ng_1796	2740		15.09	0.438	527.034	582.516	1396.44	1.42241	1.09252	0.410056	0.1578	0.0001	! 0.000	0.268	0.18385	5.6874	957.367	0.0189	5.5858	3.2789	2.0191	0.5554	0.0429	0.4969	0.0013	-0.7714	3.6933	2.5447	0.0236	0.3938	0.0275	8.3266	3.1086	2.0231	0.0433	0.4917
BITYA_OGPRCC_100ng_1762	2741		15.24	0.44	508.175	556.005	1351.08	1.36882	1.05632	0.40448	0.1514	0.0007	! 0.000	0.23042	0.17072	9.1038	926.892	0.022	13.5868	2.9003	1.7985	0.5769	0.0475	0.5626	0.0002	-1.6295	3.7252	1.923	0.017	0.5201	0.0333	20.5959	2.83	1.94	0.0476	0.524
BITYA_OGPRCC_100ng_1798	2742
BITYA_OGPRCC_100ng_1792	2743		15.7	0.47	575.684	654.808	1424.32	1.39055	1.03104	0.450232	0.1709	0.0001	! 0.000	0.26902	0.2009	15.8	1017.63	0.0223	8.176	3.2847	2.0666	0.6089	0.0465	0.4878	0.0009	-1.6839	3.9168	2.1746	0.0215	0.477	0.0326	12.0891	3.0984	2.0878	0.0469	0.4787
BITYA_OGPRCC_100ng_1755	2744		15.19	0.455	556.825	628.707	1423.09	1.39641	1.05097	0.433555	0.1667	0.0006	! 0.000	0.26357	0.19012	25.2293	1038.13	0.0253	7.6152	3.6031	1.8188	0.5848	0.057	0.5584	0.0008	-1.7175	3.9234	1.6975	0.0196	0.5925	0.0373	11.3394	3.3871	2.0229	0.0574	0.5037
BITYA_OGPRCC_100ng_1795	2745		15.45	0.482	587.983	647.565	1416.26	1.42663	1.05809	0.449931	0.1759	0.0002	! 0.000	0.29459	0.21316	10.0604	1018.32	0.0196	4.8513	3.3461	1.8754	0.5225	0.0479	0.5352	0.0013	-0.8386	3.8348	1.8262	0.0212	0.5437	0.0283	7.1488	3.0627	1.9131	0.0485	0.5271
BITYA_OVX_CBD_1	3113		15.72	0.5	499.272	544.811	1233.96	1.47387	1.09392	0.449124	0.1838	0	0	0.33587	0.22977	30.8138	784.91	0.0442	15.5213	2.87	1.5525	0.9517	0.0616	0.6577	0.0024	-1.1697	3.4603	1.3547	0.0271	0.7569	0.064	22.1224	2.6219	1.6941	0.0622	0.5966
BITYA_OVX_CBD_2	3114		15.31	0.494	488.289	522.752	1233.96	1.43643	1.08159	0.433031	0.1701	0	! 0.000	0.29443	0.20744	28.3522	782.449	0.0399	13.7538	3.202	1.9996	0.932	0.0591	0.4996	0.0019	-2.3929	3.6293	1.8216	0.0238	0.5343	0.0585	20.4807	2.9777	2.0902	0.0597	0.4788
BITYA_OVX_CBD_3	3115		15.45	0.466	463.011	492.645	1237.94	1.48106	1.14078	0.406722	0.1599	0	! 0.000	0.31871	0.21556	17.3698	793.242	0.0363	10.7337	3.2941	1.9587	0.8312	0.0604	0.5106	0.0036	-2.1037	3.4414	1.983	0.0269	0.5009	0.0529	16.1755	2.9138	2.0458	0.0615	0.4912
BITYA_OVX_CBD_4	3116		15.67	0.464	462.064	525.213	1260.75	1.45613	1.10517	0.423954	0.1669	0	! 0.000	0.30876	0.21128	14.1508	752.152	0.0226	13.5073	3.3901	2.1597	0.7251	0.0411	0.4631	0.0031	-1.5249	3.4843	1.9231	0.0254	0.5126	0.0322	20.102	3.1953	2.2686	0.0419	0.4383
BITYA_OVX_CBD_5	3117		15.69	0.492	496.053	535.344	1246.65	1.40919	1.0559	0.438554	0.1668	0	0	0.27445	0.19866	27.9735	780.745	0.0392	9.9173	2.1754	1.605	0.6422	0.0757	0.6333	0.0001	-0.7832	4.4303	1.2279	0.0261	0.801	0.0584	14.7779	2.1319	1.7738	0.0758	0.5775
BITYA_OVX_CBD_6	3118		15.68	0.498	489.615	574.256	1281.01	1.3787	1.01424	0.458821	0.175	0	! 0.000	0.2585	0.18984	18.0325	788.224	0.0232	6.7878	3.6517	1.9438	0.6452	0.0521	0.4925	0.0019	-0.8846	3.4774	1.7345	0.0286	0.5844	0.0329	9.8833	3.5651	2.0086	0.0528	0.4776
BITYA_OVX_CBD_7	3119		15.6	0.478	474.562	534.965	1279.5	1.4777	1.12001	0.425524	0.1701	0	! 0.000	0.3263	0.22436	20.0207	777.336	0.0289	9.4769	3.4397	1.904	0.6956	0.0538	0.5249	0.0011	-1.5657	3.8738	1.7079	0.0263	0.5839	0.0424	14.0852	3.2957	2.02	0.0542	0.4934
BITYA_OVX_6WK_1	3076		15.32	0.402	467.597	527.119	1331.15	1.40981	1.11125	0.378699	0.1431	0	! 0.000	0.24569	0.17591	34.2467	922.293	0.0278	24.332	3.1457	1.3889	0.7494	0.0486	0.729	0	0	4.3222	! 0.000	0.01	! 0.000	0.0431	37.6929	3.1442	2.1803	0.0486	0.4628
BITYA_OVX_6WK_2	3077		15.23	0.414	476.901	540.666	1336.35	1.3977	1.08889	0.393067	0.1508	0.0003	! 0.000	0.24643	0.17526	20.0161	880.285	0.019	13.5832	2.9873	1.8601	0.5788	0.0397	0.5415	0.0003	-1.5929	4.4845	1.5349	0.0177	0.6589	0.0286	20.5099	2.9281	2.2008	0.0398	0.4555
BITYA_OVX_6WK_3	3078		15.28	0.404	466.913	538.887	1335.26	1.39544	1.09176	0.387885	0.1463	0.0002	! 0.000	0.24052	0.17896	24.6684	930.366	0.0242	18.9456	3.0992	1.9322	0.7081	0.0435	0.5188	0.0003	-1.5109	3.8691	1.4833	0.0177	0.675	0.0364	28.5589	3.0418	2.2321	0.0436	0.4488
BITYA_OVX_6WK_4	3079		14.99	0.425	492.227	537.929	1342.1	1.39909	1.09783	0.38429	0.1449	0.0003	! 0.000	0.24548	0.17666	41.0884	967.448	0.0265	14.7867	3.5413	2.4257	0.8951	0.04	0.4127	0.0044	-0.7724	3.8058	1.9533	0.024	0.5105	0.0376	22.2641	3.3309	2.7419	0.041	0.3635
BITYA_OVX_6WK_5	3080		15.4	0.416	477.038	535.877	1318.29	1.39096	1.08628	0.390106	0.1469	0.0013	! 0.000	0.23596	0.17606	13.3113	908.61	0.0162	10.0823	3.5181	1.8102	0.493	0.0406	0.5546	0.0004	-0.8149	4.1254	1.3187	0.0172	0.7605	0.0239	15.0471	3.3937	2.2432	0.0408	0.4473
BITYA_OVX_6WK_6	3081		14.55	0.418	482.238	505.5	1325.81	1.40833	1.12281	0.364376	0.1374	0.0003	! 0.000	0.23971	0.1728	36.0256	928.587	0.0283	18.5912	3.6483	2.7491	0.9284	0.0383	0.3639	0.0036	0.6986	3.4715	2.2705	0.0206	0.4415	0.0414	28.5084	3.4564	3.0837	0.0392	0.3224
BITYA_OVX_6WK_7	3082		15.35	0.423	493.595	563.38	1350.58	1.41734	1.09707	0.400865	0.1542	0.0007	! 0.023	0.25975	0.18594	25.2158	916.956	0.0181	10.3261	3.575	1.4372	0.4937	0.0474	0.6993	0.0001	-1.4934	3.762	1.3142	0.0192	0.7608	0.0274	15.6802	3.5444	2.1016	0.0474	0.4777
BITYA_SHAM_6WK_1	3083		15.1	0.491	581.442	608.398	1355.64	1.41335	1.06595	0.43118	0.1665	0.0008	! 0.000	0.27777	0.20391	78.9911	983.184	0.0533	49.2363	3.3998	2.9671	1.585	0.0467	0.3384	0.0115	4.2542	3.3792	2.3995	0.0241	0.4145	0.075	72.5802	3.1368	3.3738	0.0486	0.2972
BITYA_SHAM_6WK_2	3084		14.91	0.469	547.781	548.602	1338.95	1.40845	1.09847	0.39173	0.1492	0.0001	! 0.000	0.25748	0.19061	83.6435	974.974	0.0566	41.8043	3.2835	2.9808	1.5507	0.0494	0.3381	0.0084	3.669	3.6166	2.3417	0.0256	0.431	0.0817	63.6475	2.9118	3.4694	0.0507	0.2872
BITYA_SHAM_6WK_3	3085		14.57	0.418	479.091	503.173	1318.84	1.39981	1.11801	0.362095	0.1357	0.0006	! 0.010	0.23045	0.16487	58.7398	926.808	0.039	29.7655	3.4423	2.887	1.2642	0.0408	0.3463	0.0072	2.095	3.4787	2.4583	0.0214	0.407	0.0552	44.8921	3.1778	3.1397	0.0422	0.317
BITYA_SHAM_6WK_4	3086		15.5	0.487	555.854	585.684	1366.18	1.42749	1.09333	0.413383	0.1615	0.0009	! 0.000	0.27689	0.20137	72.0126	937.071	0.0485	37.1822	3.3327	2.8779	1.4204	0.0462	0.3474	0.0098	0	3.4508	2.5163	0.0233	0.3988	0.0689	56.4213	2.9986	3.1488	0.0479	0.3139
BITYA_SHAM_12WK_1	3120		15.54	0.545	574.824	636.553	1328.45	1.45292	1.03931	0.488311	0.2056	0	0	0.33069	0.23018	53.2521	898.048	0.0504	31.5134	3.478	2.7945	1.3473	0.061	0.351	0.0134	9.6275	3.1822	2.8663	0.0339	0.338	0.068	39.9091	3.3564	2.8273	0.0636	0.3486
BITYA_SHAM_12WK_2	3121		15.62	0.536	547.178	601.238	1316.42	1.42508	1.04237	0.464978	0.1866	0	! 0.000	0.29842	0.21545	48.6129	812.934	0.0464	40.4243	3.1704	2.5884	1.4147	0.0479	0.3813	0.0174	16.2751	3.0991	2.1437	0.0342	0.4814	0.0606	50.2404	3.0942	2.9421	0.05	0.3313
BITYA_SHAM_12WK_3	3122		15.47	0.535	552.291	610.611	1312.45	1.44457	1.04945	0.472223	0.1904	0	! 0.000	0.32251	0.22779	45.7726	822.402	0.0442	40.0047	3.0614	2.6891	1.4049	0.0477	0.3627	0.0198	16.9774	3.0915	2.5196	0.0344	0.3907	0.0557	46.1916	2.9862	2.7942	0.05	0.3503
BITYA_SHAM_12WK_4	3123		15.7	0.542	556.74	609.38	1299.57	1.48145	1.07127	0.47709	0.1971	0	! 0.000	0.35856	0.24897	46.0567	798.544	0.043	37.036	2.9968	2.4555	1.3447	0.0472	0.4065	0.0194	13.0778	3.02	2.1408	0.0354	0.4712	0.0545	46.3564	2.9215	2.6931	0.0493	0.3694
BITYA_SHAM_12WK_5	3124		15.28	0.541	552.859	617.333	1302.22	1.50967	1.08678	0.481774	0.2063	0	0	0.38615	0.26087	59.122	791.916	0.0644	56.4132	2.9509	2.9676	1.7967	0.0562	0.3243	0.0309	33.013	3.028	2.9073	0.0387	0.334	0.0808	63.9889	2.8405	3.0564	0.0594	0.3132
BITYA_SHAM_12WK_6	3125		15.07	0.56	591.865	659.086	1333.28	1.39703	0.984946	0.502932	0.1963	0	0	0.29242	0.22101	70.8618	817.952	0.0731	65.8554	2.8059	3.1014	2.0917	0.0506	0.3093	0.0459	35.5242	2.848	2.8236	0.0417	0.3366	0.0859	73.1833	2.7655	3.2713	0.0529	0.2946
BITYA_SHAM_12WK_7	3126		15.36	0.527	546.231	608.434	1325.8	1.42275	1.03893	0.466766	0.1876	0	0	0.2995	0.21868	50.3171	797.218	0.0437	41.2566	2.8377	2.3917	1.3766	0.0455	0.3925	0.0199	18.82	2.8847	2.0397	0.0368	0.427	0.0551	49.2219	2.8016	2.6668	0.047	0.3633
BITYA_SHAM_12WK_8	3127		15.85	0.572	595.842	614.493	1272.68	1.49805	1.06937	0.490434	0.2053	0.0001	! 0.000	0.38532	0.27085	66.6014	852.982	0.0722	53.9096	3.0495	2.7636	1.8667	0.0592	0.3506	0.0256	25.2679	3.0254	2.2599	0.0382	0.4399	0.0952	65.1931	2.887	3.0801	0.0619	0.309
BITYA_SHAM_12WK_9	3128		15.32	0.547	585.143	605.688	1307.52	1.47154	1.06821	0.473056	0.1912	0	0	0.3511	0.24543	25.0385	868.699	0.0406	17.7738	3.3846	2.1127	1.0171	0.0595	0.4559	0.0068	4.9274	3.4395	2.0191	0.0311	0.4519	0.058	23.6056	3.1282	2.2707	0.0612	0.44
BITYA_SHAM_12WK_10	3129		15.92	0.563	616.292	615.818	1313.11	1.51726	1.09552	0.478665	0.207	0	0	0.39197	0.26883	48.7076	803.088	0.0484	46.7508	3.08	2.8886	1.5114	0.0482	0.3408	0.0227	20.7155	3.0228	2.649	0.0372	0.3686	0.0622	56.4583	3.0476	3.038	0.0504	0.3236
BITYA_12wOVX_CB2KO_1OGP1	3682
BITYA_12wOVX_CB2KO_1OGP2	3683		16.31	0.448	527.667	569.948	1389.58	1.54123	1.18277	0.41107	0.1722	0	0	0.37921	0.25498	13.9955	941.45	0.0229	9.5783	2.9227	1.3562	0.592	0.0465	0.7458	0	-0.3105	3.8944	! 0.000	0.01	! 0.000	0.0353	14.7476	2.9196	1.734	0.0465	0.582
BITYA_12wOVX_CB2KO_1OGP3	3684		16.24	0.505	611.682	585	1387.66	1.64374	1.25059	0.421149	0.1886	0	0.01	0.51068	0.32416	76.8018	1031.76	0.0696	35.7504	2.9572	2.4572	1.56	0.0631	0.4074	0.0132	4.6436	3.9729	2.1091	0.0417	0.4748	0.1039	55.1745	2.532	2.7752	0.0647	0.3592
BITYA_12wOVX_CB2KO_1OGP4	3685		16.27	0.433	507.826	509.741	1358.24	1.6551	1.31601	0.367778	0.161	0.0001	! 0.000	0.45925	0.28172	26.0368	958.417	0.0354	21.6021	2.4777	1.7687	0.9018	0.049	0.5768	0.0009	0.5093	5.1097	1.1325	0.0321	0.8923	0.0555	33.9281	2.4194	2.2665	0.0492	0.4442
BITYA_12wOVX_CB2KO_1OGP6	3686		15.59	0.42	486.48	512.889	1361.53	1.49408	1.18349	0.372549	0.1493	0.0005	! 0.000	0.30806	0.21033	33.9731	948.702	0.0436	23.482	3.0599	2.8379	1.3001	0.0427	0.3512	0.0104	0.6224	3.5835	2.7658	0.0272	0.3617	0.062	36.2069	2.6367	2.9166	0.0441	0.3416
BITYA_12wOVX_CB2KO_2OGP1	3687		15.97	0.459	528.487	530.677	1358.93	1.61002	1.24608	0.400999	0.1738	0.0003	! 0.010	0.44274	0.27539	28.3629	949.386	0.0393	19.6281	2.5933	1.8835	0.945	0.0533	0.5341	0.0003	-1.7364	4.127	1.6948	0.0181	0.5907	0.0605	30.2627	2.5355	2.2248	0.0534	0.4478
BITYA_12wOVX_CB2KO_2OGP3	3688		16.13	0.49	582.673	573.232	1387.11	1.66027	1.27807	0.407416	0.1817	0.0003	! 0.000	0.51553	0.31735	65.3078	1008.5	0.0657	49.1655	2.972	2.718	1.7581	0.0519	0.3631	0.0227	13.8564	3.5613	2.3712	0.042	0.4198	0.0919	68.182	2.6387	3.0083	0.0533	0.3247
BITYA_12wOVX_CB2KO_2OGP5	3689		15.89	0.478	569.948	585.41	1378.77	1.58602	1.21221	0.41583	0.1798	0.0008	! 0.000	0.42728	0.27371	36.0256	1001.38	0.0369	14.0656	2.5984	1.4262	0.8548	0.0549	0.741	0.0005	-0.5884	3.5084	0.9923	0.0207	1.0976	0.0578	22.1491	2.5197	1.8696	0.0551	0.542
BITYA_12wOVX_CB2KO_2OGP6	3690		15.81	0.446	534.235	540.529	1396.69	1.63337	1.28342	0.38259	0.1692	0	0	0.44288	0.26854	37.8044	976.479	0.042	24.5363	2.4794	1.8698	1.0865	0.0483	0.5487	0.0021	-0.5613	3.8342	1.4186	0.0268	0.7117	0.0647	38.1831	2.297	2.3259	0.0487	0.4388
BITYA_12wOVX_CB2KO_2OGP7	3691		15.8	0.473	565.706	619.345	1383.97	1.51921	1.13591	0.440947	0.185	0.0005	! 0.000	0.37271	0.25202	45.1934	977.984	0.045	26.2286	3.0819	2.7154	1.2298	0.0475	0.3666	0.0044	-0.6544	3.7501	2.5652	0.0253	0.3888	0.0682	41.1561	2.7994	2.805	0.0483	0.3542
BITYA_12wOVX_CB2KO_3c1	3692		16.38	0.501	587.736	590.61	1353.86	1.64153	1.24107	0.428391	0.1899	0.0003	! 0.000	0.51324	0.32389	48.3405	976.342	0.0535	23.6285	2.7827	2.0708	1.2356	0.0581	0.4882	0.0039	-1.042	4.8094	1.3389	0.0407	0.7688	0.0836	37.3519	2.5598	2.6831	0.0585	0.3703
BITYA_12wOVX_CB2KO_3c2	3693		15.92	0.461	541.487	573.095	1374.66	1.59582	1.22522	0.410536	0.1802	0	! 0.000	0.42692	0.27589	21.7949	962.932	0.0287	11.9629	2.7084	1.1703	0.6797	0.0525	0.8722	0.0023	-0.6155	3.0635	0.6992	0.0527	1.3376	0.0425	18.2368	2.6952	1.7601	0.0524	0.572
BITYA_12wOVX_CB2KO_3c3	3694		16.03	0.485	573.779	597.178	1376.3	1.57742	1.19544	0.425665	0.1848	0.0001	! 0.000	0.41934	0.27357	37.257	971.142	0.0401	22.2006	2.2503	1.4303	0.9482	0.0534	0.711	0.0004	0	7.7111	0.8408	0.0457	1.1765	0.0615	34.1736	2.2324	2.0905	0.0534	0.4826
BITYA_12wOVX_CB2KO_3c4	3695		16.03	0.477	568.58	600.599	1386.16	1.57163	1.19204	0.424719	0.1843	0.0003	! 0.010	0.41229	0.26559	28.2261	959.375	0.0345	12.3749	2.5012	1.6142	0.8514	0.0489	0.6255	0.0009	-1.261	6.6586	1.384	0.0343	0.7216	0.0535	19.3396	2.4262	1.9898	0.049	0.5058
BITYA_12wOVX_CB2KO_3c5	3696		15.87	0.464	537.792	571.453	1364.95	1.52889	1.17327	0.411097	0.1713	0.0006	! 0.000	0.36718	0.24302	26.5841	943.502	0.0379	14.0574	2.3315	1.7348	0.8905	0.0517	0.5724	0.0018	-1.1879	4.5734	1.3065	0.0336	0.75	0.0577	21.735	2.2185	2.1007	0.052	0.4754
BITYA_12wOVX_CB2KO_4c1	3697		15.95	0.512	595.809	607.987	1359.47	1.62808	1.21924	0.439173	0.1966	0.0006	! 0.010	0.49409	0.3117	54.3612	962.522	0.0522	41.8665	3.081	2.3161	1.4504	0.0505	0.4325	0.0114	8.0592	3.1983	1.7126	0.0308	0.5842	0.0757	61.1722	2.908	2.9758	0.0522	0.3318
BITYA_12wOVX_CB2KO_4c2	3698		15.42	0.505	594.168	624.955	1382.6	1.50141	1.1193	0.44423	0.183	0.0002	! 0.010	0.36252	0.24591	67.9077	953.491	0.0693	40.1057	2.1272	1.8796	1.6059	0.0523	0.5408	0.0068	0	4.6151	1.1521	0.0484	0.881	0.1027	61.606	1.9863	2.7405	0.0524	0.3602
BITYA_12wOVX_CB2KO_4c3	3699		16.1	0.449	531.908	545.044	1357.42	1.6623	1.29577	0.392371	0.1757	0.0001	! 0.000	0.49506	0.29925	35.0677	969.09	0.0352	17.5158	2.6906	1.8526	0.8617	0.0506	0.5417	0.0006	-1.0865	3.963	1.3452	0.0188	0.7429	0.0547	27.3797	2.5407	2.2343	0.0508	0.4451
BITYA_12wOVX_CB2KO_4c4	3700		15.82	0.513	613.05	606.209	1379.32	1.64702	1.2437	0.429787	0.194	0.0001	! 0.010	0.51158	0.31607	65.7183	1005.76	0.0548	28.2724	3.5823	2.5995	1.364	0.0551	0.3827	0.0114	6.3988	3.3416	2.3861	0.0278	0.4167	0.0815	43.0764	3.1501	2.7717	0.0575	0.3591
BITYA_12wOVX_CB2KO_4c5	3701		15.88	0.46	523.014	537.245	1329.37	1.64933	1.2807	0.397054	0.1777	0.0002	! 0.000	0.489	0.29889	14.2691	969.911	0.0299	10.4518	2.6547	1.2863	0.6556	0.0562	0.7816	0.0011	-0.5862	5.9023	0.9615	0.0417	1.0418	0.0454	16.0691	2.5511	1.5248	0.0564	0.6559
BITYA_12wSHAM_CB2KO_1c1	3702		16.43	0.537	630.428	592.525	1351.67	1.72715	1.30278	0.431035	0.2036	0.0002	! 0.000	0.62285	0.37575	83.2329	991.804	0.0787	54.6336	3.1565	3.166	1.9781	0.0561	0.3108	0.0302	25.1171	3.3818	2.8792	0.041	0.3423	0.1093	68.2767	2.8349	3.3933	0.0585	0.2886
BITYA_12wSHAM_CB2KO_1c2	3703		15.51	0.511	588.694	560.78	1336.76	1.62207	1.24569	0.410236	0.1828	0.0001	! 0.010	0.45788	0.29471	99.5161	962.932	0.0904	89.9479	2.6474	3.1315	2.4526	0.0487	0.3158	0.0286	28.6718	3.0476	2.5164	0.0318	0.3937	0.1267	119.467	2.3593	3.6723	0.051	0.265
BITYA_12wSHAM_CB2KO_1c3	3704		16.01	0.528	631.933	642.606	1381.78	1.64912	1.21722	0.455208	0.2051	0.0002	! 0.010	0.55267	0.34969	105.263	1025.05	0.0922	63.3599	2.768	3.2249	2.2885	0.0549	0.3028	0.0304	27.8186	3.1947	2.6972	0.0377	0.3645	0.1301	80.3405	2.4187	3.6243	0.0574	0.2653
BITYA_12wSHAM_CB2KO_1c4	3705		15.88	0.545	655.058	644.933	1387.53	1.62493	1.19965	0.454944	0.2034	0.0008	0.0373	0.51203	0.32993	86.2433	1005.62	0.0757	51.9024	3.0279	2.6861	1.8567	0.0564	0.3717	0.0158	8.505	3.3441	2.109	0.0341	0.4786	0.1137	76.2519	2.7039	3.2774	0.0584	0.2955
BITYA_12wSHAM_CB2KO_1c5	3706		16.06	0.504	587.736	588.831	1349.9	1.6644	1.26147	0.425568	0.1938	0	0	0.53079	0.33308	77.486	999.056	0.0698	52.7068	3.2458	2.9889	1.8373	0.0531	0.3292	0.0176	6.1501	3.5073	2.5742	0.0322	0.3793	0.101	76.7633	2.8323	3.3489	0.0553	0.2932
BITYA_12wSHAM_CB2KO_2c1	3707		15.62	0.531	615.65	622.355	1341.41	1.62623	1.19893	0.456475	0.2019	0.0006	! 0.019	0.52491	0.34399	71.6021	983.594	0.0676	33.0442	3.0116	2.8117	1.6758	0.0552	0.3555	0.0163	1.4271	4.2088	2.3435	0.0512	0.4292	0.0992	52.6668	2.6054	3.2131	0.0555	0.3066
BITYA_12wSHAM_CB2KO_2c2	3708		15.87	0.519	627.418	635.491	1378.49	1.70549	1.2618	0.452624	0.212	0	! 0.000	0.62769	0.37429	64.6237	1008.36	0.056	36.6626	3.3788	2.5224	1.4287	0.0556	0.3974	0.0134	12.9331	3.3155	2.2017	0.0307	0.4501	0.0827	50.2441	3.0465	2.8302	0.0582	0.3571
BITYA_12wSHAM_CB2KO_2c3	3709		15.93	0.526	634.26	636.312	1386.43	1.61264	1.1951	0.450791	0.1994	0.0002	! 0.010	0.48925	0.31477	76.8018	1006.58	0.0684	53.5357	3.0801	3.0117	1.8084	0.0518	0.3306	0.0248	22.3767	3.3773	2.6835	0.0404	0.3692	0.0933	65.8635	2.7727	3.2507	0.0535	0.3066
BITYA_12wSHAM_CB2KO_2c4	3710		15.84	0.505	592.389	587.052	1347.3	1.60854	1.2164	0.428145	0.1868	0.0011	! 0.000	0.4629	0.29442	58.3293	1000.29	0.0531	38.1611	3.4029	2.7529	1.4818	0.0502	0.3607	0.0121	7.446	3.2471	2.2239	0.026	0.4463	0.079	54.8887	3.1017	3.2609	0.0525	0.301
BITYA_12wSHAM_CB2KO_2c5	3711		15.67	0.529	629.47	626.597	1363.44	1.62256	1.20218	0.451043	0.1995	0	0	0.50037	0.32499	74.0652	1013.29	0.0682	49.294	3.2402	2.8425	1.7745	0.0558	0.3496	0.0232	21.639	3.2259	2.3411	0.0344	0.4319	0.0955	61.32	2.9984	3.2592	0.059	0.2994
Bitya_CBD2_12w_sh1	3781		15.1	0.458	526.982	586.642	1351.54	1.39631	1.05881	0.424997	0.1622	0.0002	! 0.000	0.26255	0.19333	34.1099	923.935	0.0336	25.1893	3.3028	2.6683	1.0852	0.04	0.3724	0.008	1.5546	3.3829	2.226	0.025	0.4436	0.0468	37.7282	3.1101	2.9377	0.0413	0.3392
Bitya_CBD2_12w_sh2	3782		14.83	0.455	532.456	574.874	1369.87	1.38317	1.06123	0.411336	0.1552	0.0001	! 0.000	0.24304	0.181	41.7726	923.661	0.0395	30.2586	3.2688	2.7014	1.2521	0.0416	0.3717	0.0088	0.4235	3.5034	2.3108	0.0259	0.4321	0.0539	43.9904	3.05	3.0691	0.0428	0.3263
Bitya_CBD2_12w_sh3	3783		14.82	0.476	565.706	623.723	1391.77	1.37739	1.03257	0.438009	0.1669	0.001	! 0.000	0.24888	0.17954	29.5944	958.28	0.0271	13.5901	3.6746	2.53	0.8503	0.0418	0.3972	0.004	-1.7413	3.5579	2.1379	0.0237	0.4744	0.0385	20.2942	3.5202	2.7678	0.0428	0.3619
Bitya_CBD2_12w_sh4	3784		15.16	0.468	551.202	577.884	1367.27	1.386	1.06195	0.412944	0.156	0.0008	! 0.000	0.24555	0.1859	43.9619	928.724	0.0394	39.3355	3.2022	2.5456	1.1937	0.042	0.3934	0.0061	0	3.3838	2.435	0.022	0.4121	0.0581	60.0925	2.9157	2.6288	0.0432	0.3799
Bitya_CBD2_12w_sh5	3785		14.95	0.459	540.118	575.421	1335.8	1.44466	1.09914	0.421139	0.1677	0.0009	! 0.010	0.2958	0.21844	41.6357	927.356	0.038	29.0796	3.3929	2.6222	1.1619	0.0408	0.3844	0.0062	0.3503	3.4248	2.3898	0.0223	0.4231	0.0555	45.0698	3.1224	2.9649	0.0421	0.3381
Bitya_CBD2_12w_sh6	3762
Bitya_CBD2_12w_sh7	3763		15.04	0.466	544.634	603.883	1358.11	1.38163	1.03862	0.434887	0.1674	0.0002	! 0.000	0.25321	0.18363	22.4791	882.611	0.0178	8.2821	3.4525	2.4807	0.6778	0.0322	0.4089	0.0062	0	3.49	2.4314	0.0251	0.4131	0.0234	12.2585	3.3634	2.5127	0.0331	0.3966
Bitya_CBD2_12w_sh8	3764		15.25	0.482	564.338	602.514	1342.1	1.41202	1.05971	0.436763	0.1664	0.0003	! 0.000	0.28429	0.20395	54.9085	925.303	0.0444	45.6047	3.2575	2.6539	1.3398	0.0443	0.3677	0.0081	2.9414	3.3766	2.1704	0.0223	0.426	0.0657	72.4184	2.9493	3.0436	0.046	0.3312
Bitya_CBD2_12w_CBD1	3765		15.29	0.469	555.717	601.283	1376.85	1.41431	1.07076	0.426815	0.1669	0.0006	! 0.000	0.27088	0.19122	9.48	956.227	0.0173	8.3044	3.3478	1.7844	0.4852	0.0426	0.5582	0.0002	-2.3373	4.0665	1.465	0.0184	0.6857	0.0262	12.6562	3.2898	2.0006	0.0427	0.5024
Bitya_CBD2_12w_CBD2	3766		15.73	0.45	532.592	591.841	1383.69	1.42849	1.08841	0.419466	0.1653	0.0002	! 0.000	0.28132	0.19549	13.8586	983.594	0.0217	13.1996	3.236	1.8555	0.5169	0.0499	0.5456	0.0004	-1.9734	3.8209	1.6594	0.0175	0.6048	0.0323	19.7828	3.0174	1.9948	0.0501	0.509
Bitya_CBD2_12w_CBD3	3767		15.66	0.458	546.276	581.989	1382.05	1.39807	1.07348	0.410438	0.1558	0.0001	! 0.000	0.2553	0.18071	28.3629	975.658	0.0302	20.6252	2.7793	1.6461	0.6975	0.0515	0.6128	0.0003	-1.5284	4.2973	1.2488	0.0194	0.794	0.0459	31.4319	2.6799	2.1085	0.0516	0.4807
Bitya_CBD2_12w_CBD4	3768		15.25	0.437	521.646	568.306	1392.31	1.4823	1.14926	0.398872	0.1598	0.0001	! 0.000	0.31324	0.21235	15.2269	943.092	0.0196	13.5479	3.205	2.0329	0.6004	0.0392	0.4942	0.0006	-2.2119	3.5395	2.0183	0.0165	0.4954	0.0293	20.4874	3.0392	2.0786	0.0394	0.4838
Bitya_CBD2_12w_CBD5	3769		15.19	0.446	517.541	589.789	1362.35	1.37038	1.0412	0.422722	0.1582	0.0006	! 0.000	0.2373	0.17762	7.1538	899.305	0.0139	7.2904	3.661	1.7201	0.3896	0.0413	0.5898	0.0006	-1.6506	4.6292	1.4367	0.0204	0.7105	0.0205	10.9358	3.4789	1.8821	0.0416	0.5365
Bitya_CBD2_12w_CBD6	3770		15.31	0.451	537.519	560.917	1376.85	1.43679	1.11318	0.399735	0.1542	0.0007	! 0.000	0.2793	0.19704	14.6796	974.153	0.0224	12.3478	2.9765	1.7892	0.5752	0.0469	0.5603	0.0003	-1.5776	3.7519	1.4171	0.0183	0.7053	0.0336	18.6142	2.8888	2.0133	0.047	0.4976
Bitya_CBD2_12w_CBD7	3771		15.38	0.454	540.118	593.21	1401.07	1.41409	1.08057	0.416079	0.1606	0.0001	! 0.000	0.27068	0.19144	18.3741	960.332	0.0239	14.5016	2.8336	1.4	0.6264	0.0466	0.7184	0.0001	-0.8306	3.5012	0.843	0.0177	1.1846	0.0357	21.7271	2.7922	1.9388	0.0467	0.5165
Bitya_CBD2_12w_CBD8	3772		15.27	0.46	560.643	630.428	1411.2	1.35427	1.01619	0.436965	0.1618	0.0006	! 0.000	0.23303	0.17192	25.4894	984.826	0.0272	15.3546	2.848	1.6872	0.6681	0.0495	0.5844	0.0006	-1.7157	3.5524	1.2182	0.019	0.8214	0.0408	23.1844	2.685	1.9461	0.0498	0.505
Bitya_CBD2_12w_OVX_Veh1	3773		15.45	0.455	529.719	587.463	1357.29	1.37398	1.04127	0.425663	0.1598	0	0	0.24064	0.17584	6.196	945.418	0.0178	8.949	3.0408	1.5467	0.3928	0.0562	0.6525	0	-0.8449	4.5099	1.7948	0.01	0.5641	0.0262	13.179	2.9987	1.6371	0.0562	0.6173
Bitya_CBD2_12w_OVX_Veh2	3774		14.93	0.443	516.857	579.389	1378.63	1.37993	1.05849	0.411614	0.1539	0.0004	! 0.000	0.2423	0.17326	3.4593	922.156	0.0138	8.4146	3.1559	2.0982	0.3871	0.0423	0.4777	0	-0.8375	4.2682	! 0.000	0.01	! 0.000	0.0207	12.6519	3.1435	2.0982	0.0423	0.4777
Bitya_CBD2_12w_OVX_Veh3	3775		15.6	0.479	568.169	581.168	1374.53	1.48176	1.13474	0.413549	0.1715	0.0005	! 0.000	0.31797	0.21028	26.8578	977.163	0.0283	17.8364	3.49	1.9169	0.7554	0.0487	0.5292	0.0016	-0.7145	3.6183	1.6924	0.0193	0.5956	0.0425	27.3533	3.2597	2.224	0.0493	0.4543
Bitya_CBD2_12w_OVX_Veh4	3776		14.71	0.444	530.54	575.284	1384.24	1.38171	1.06596	0.404823	0.1518	0.0003	! 0.000	0.23984	0.17319	5.9223	968.816	0.0147	7.5101	3.467	1.9862	0.4514	0.0391	0.4916	0.0009	-2.4689	3.6575	2.1827	0.0185	0.4484	0.0216	11.2401	3.2918	1.9727	0.0396	0.4935
Bitya_CBD2_12w_OVX_Veh5	3777		15.22	0.44	509.605	583.768	1361.94	1.38446	1.05501	0.419297	0.1586	0.0007	! 0.000	0.24814	0.18225	15.9111	942.681	0.0219	11.7777	3.2154	2.2863	0.6276	0.0414	0.4343	0.0003	-3.3305	4.1206	! 2.671	0.0178	! 0.371	0.0325	17.5514	3.1425	2.3453	0.0415	0.4346
Bitya_CBD2_12w_OVX_Veh6	3778		15.29	0.458	539.434	601.42	1386.16	1.39366	1.05452	0.427475	0.1628	0.0005	! 0.000	0.2544	0.18399	9.6168	993.583	0.0224	7.7891	2.9757	1.7422	0.4481	0.0637	0.5755	0.0004	-3.3143	3.8764	1.7334	0.0193	0.5771	0.0334	11.6736	2.7604	1.8119	0.064	0.5533
Bitya_CBD2_12w_OVX_Veh7	3779		15.36	0.455	542.992	573.779	1386.43	1.45634	1.1222	0.406239	0.1566	0.0001	! 0.000	0.29563	0.20513	24.2579	1004.8	0.0262	7.6454	3.414	2.0432	0.6425	0.0525	0.4961	0.0016	-0.734	3.5271	1.8439	0.02	0.554	0.0395	11.7643	3.1269	2.1941	0.0532	0.4592
Bitya_CBD2_12w_OVX_Veh8	3780		15.22	0.457	546.55	604.704	1402.17	1.39514	1.05976	0.423001	0.1621	0.0006	! 0.000	0.25689	0.18607	16.5953	988.11	0.0209	12.3302	3.2135	1.7359	0.5248	0.0509	0.577	0.0005	-1.6157	3.7657	1.3408	0.018	0.7456	0.0311	18.5543	3.0154	2.0097	0.0512	0.4971

## Sheet: normaled
real data
	R	Q	S	V	K	G	W	L(from Yankel)	I	J
	BV/TV	Tb.TMD	Tb.Conn.D	Tb.N (PL)	cortical Th.	cort vBMD	Tb.Th	BA/TA	CT.Dia.Dia	CT.Med.Dia
Bitya_CBD2_12w_sh1	0.0336	923.935	25.1893	1.0852	0.1622	586.642	0.04	0.42499	1.39631	1.05881
Bitya_CBD2_12w_sh2	0.0395	923.661	30.2586	1.2521	0.1552	574.874	0.0416	0.41134	1.38317	1.06123
Bitya_CBD2_12w_sh3	0.0271	958.28	13.5901	0.8503	0.1669	623.723	0.0418	0.43801	1.37739	1.03257
Bitya_CBD2_12w_sh4	0.0394	928.724	39.3355	1.1937	0.156	577.884	0.042	0.41294	1.386	1.06195
Bitya_CBD2_12w_sh5	0.038	927.356	29.0796	1.1619	0.1677	575.421	0.0408	0.42114	1.44466	1.09914
Bitya_CBD2_12w_sh7	0.0178	882.611	8.2821	0.6778	0.1674	603.883	0.0322	0.43489	1.38163	1.03862
Bitya_CBD2_12w_sh8	0.0444	925.303	45.6047	1.3398	0.1664	602.514	0.0443	0.43676	1.41202	1.05971
BITYA_OGPRCC_V_1784	0.016	929.079	3.087	0.4229	0.1623	543.569	0.0478	0.41649	1.38988	1.0617
BITYA_OGPRCC_V_1758	0.0153	893.411	3.177	0.47	0.1514	505.032	0.0433	0.38198	1.50978	1.1869
BITYA_OGPRCC_V_1_2	0.0202	916.916	12.9276	0.5329	0.1603	559.148	0.0461	0.42427	1.391	1.05545
BITYA_OGPRCC_V_2_1	0.012	929.762	2.9233	0.2996	0.1536	548.216	0.0489	0.4105	1.3921	1.06884
BITYA_OGPRCC_V_2_2	0.0248	957.777	5.7643	0.6388	0.1689	618.594	0.0491	0.44781	1.3816	1.02666
BITYA_OGPRCC_V_1785	0.0141	927.985	4.1855	0.406	0.1589	579.51	0.0459	0.41904	1.37765	1.05006
BITYA_OGPRCC_V_1760	0.0164	946.297	7.9945	0.4986	0.1657	584.976	0.04	0.41536	1.4591	1.11565
BITYA_OGPRCC_10ng_1799	0.0378	1000.69	11.4778	0.9125	0.1675	602.058	0.0575	0.42403	1.44328	1.09534
BITYA_OGPRCC_10ng_1779	0.0221	913.09	10.836	0.5246	0.1644	576.777	0.053	0.41723	1.44765	1.10513
BITYA_OGPRCC_10ng_1759	0.0263	938.781	16.0589	0.789	0.1568	539.06	0.0431	0.39185	1.50363	1.17259
BITYA_OGPRCC_10ng_1777	0.0312	951.49	11.8934	0.6547	0.1566	587.026	0.06	0.41487	1.39185	1.06468
BITYA_OGPRCC_10ng_1793	0.017	987.841	6.2575	0.4928	0.1589	593.996	0.0464	0.41544	1.3986	1.06932
BITYA_OGPRCC_10ng_1763	0.0213	970.759	6.3699	0.5421	0.1584	586.889	0.0497	0.42128	1.36956	1.04187
BITYA_OGPRCC_10ng_cage4	0.0176	962.56	7.6509	0.4894	0.1515	575.137	0.045	0.41728	1.36895	1.045
	R	Q	S	V	K	G	W	L(from Yankel)	I	J
	BV/TV	Tb.TMD	Tb.Conn.D	Tb.N (PL)	cortical Th.	cort vBMD	Tb.Th	BA/TA	CT.Dia.Dia	CT.Med.Dia
BITYA_12wSHAM_CB2KO_1c1	0.0787	991.804	54.6336	1.9781	0.2036	592.525	0.0561	0.43103	1.72715	1.30278
BITYA_12wSHAM_CB2KO_1c2	0.0904	962.932	89.9479	2.4526	0.1828	560.78	0.0487	0.41024	1.62207	1.24569
BITYA_12wSHAM_CB2KO_1c3	0.0922	1025.05	63.3599	2.2885	0.2051	642.606	0.0549	0.45521	1.64912	1.21722
BITYA_12wSHAM_CB2KO_1c4	0.0757	1005.62	51.9024	1.8567	0.2034	644.933	0.0564	0.45494	1.62493	1.19965
BITYA_12wSHAM_CB2KO_1c5	0.0698	999.056	52.7068	1.8373	0.1938	588.831	0.0531	0.42557	1.6644	1.26147
BITYA_12wSHAM_CB2KO_2c1	0.0676	983.594	33.0442	1.6758	0.2019	622.355	0.0552	0.45648	1.62623	1.19893
BITYA_12wSHAM_CB2KO_2c2	0.056	1008.36	36.6626	1.4287	0.212	635.491	0.0556	0.45262	1.70549	1.2618
BITYA_12wSHAM_CB2KO_2c3	0.0684	1006.58	53.5357	1.8084	0.1994	636.312	0.0518	0.45079	1.61264	1.1951
BITYA_12wSHAM_CB2KO_2c4	0.0531	1000.29	38.1611	1.4818	0.1868	587.052	0.0502	0.42815	1.60854	1.2164
BITYA_12wSHAM_CB2KO_2c5	0.0682	1013.29	49.294	1.7745	0.1995	626.597	0.0558	0.45104	1.62256	1.20218
BITYA_12wOVX_CB2KO_3c1	0.0535	976.342	23.6285	1.2356	0.1899	590.61	0.0581	0.42839	1.64153	1.24107
BITYA_12wOVX_CB2KO_3c2	0.0287	962.932	11.9629	0.6797	0.1802	573.095	0.0525	0.41054	1.59582	1.22522
BITYA_12wOVX_CB2KO_3c3	0.0401	971.142	22.2006	0.9482	0.1848	597.178	0.0534	0.42566	1.57742	1.19544
BITYA_12wOVX_CB2KO_3c4	0.0345	959.375	12.3749	0.8514	0.1843	600.599	0.0489	0.42472	1.57163	1.19204
BITYA_12wOVX_CB2KO_3c5	0.0379	943.502	14.0574	0.8905	0.1713	571.453	0.0517	0.41109	1.52889	1.17327
BITYA_12wOVX_CB2KO_4c1	0.0522	962.522	41.8665	1.4504	0.1966	607.987	0.0505	0.43917	1.62808	1.21924
BITYA_12wOVX_CB2KO_4c2	0.0693	953.491	40.1057	1.6059	0.183	624.955	0.0523	0.44423	1.50141	1.1193
BITYA_12wOVX_CB2KO_4c3	0.0352	969.09	17.5158	0.8617	0.1757	545.044	0.0506	0.39237	1.6623	1.29577
BITYA_12wOVX_CB2KO_4c4	0.0548	1005.76	28.2724	1.364	0.194	606.209	0.0551	0.42979	1.64702	1.2437
BITYA_12wOVX_CB2KO_4c5	0.0299	969.911	10.4518	0.6556	0.1777	537.245	0.0562	0.39705	1.64933	1.2807
BITYA_12wOVX_CB2KO_1OGP2	0.0229	941.45	9.5783	0.592	0.1722	569.948	0.0465	0.41107	1.54123	1.18277
BITYA_12wOVX_CB2KO_1OGP3	0.0696	1031.76	35.7504	1.56	0.1886	585	0.0631	0.42115	1.64374	1.25059
BITYA_12wOVX_CB2KO_1OGP4	0.0354	958.417	21.6021	0.9018	0.161	509.741	0.049	0.36778	1.6551	1.31601
BITYA_12wOVX_CB2KO_1OGP6	0.0436	948.702	23.482	1.3001	0.1493	512.889	0.0427	0.37255	1.49408	1.18349
BITYA_12wOVX_CB2KO_2OGP1	0.0393	949.386	19.6281	0.945	0.1738	530.677	0.0533	0.401	1.61002	1.24608
BITYA_12wOVX_CB2KO_2OGP3	0.0657	1008.5	49.1655	1.7581	0.1817	573.232	0.0519	0.40742	1.66027	1.27807
BITYA_12wOVX_CB2KO_2OGP5	0.0369	1001.38	14.0656	0.8548	0.1798	585.41	0.0549	0.41583	1.58602	1.21221
BITYA_12wOVX_CB2KO_2OGP6	0.042	976.479	24.5363	1.0865	0.1692	540.529	0.0483	0.38259	1.63337	1.28342
BITYA_12wOVX_CB2KO_2OGP7	0.045	977.984	26.2286	1.2298	0.185	619.345	0.0475	0.44095	1.51921	1.13591
WT 12week Sham AVERAGE	0.0342571	924.267	27.3343	1.08011	0.163114	592.135	0.0403857	0.425724	1.39731	1.05886
stdev	0.0090675	22.072	13.2031	0.234984	0.00545601	18.5028	0.00384553	0.0111702	0.0239084	0.0213638
WT 12week OVX AVERAGE	0.0169714	928.747	5.72274	0.466971	0.160157	562.721	0.0458714	0.416493	1.41444	1.08075
stdev	0.00425704	20.5793	3.66744	0.106891	0.00623214	36.0946	0.00327756	0.0194768	0.0502789	0.0540052
WT 12week OVX+OGP AVERAGE	0.0247571	960.744	10.0778	0.6293	0.159157	580.135	0.0506714	0.414569	1.41764	1.08485
stdev	0.00757647	29.6428	3.55523	0.164885	0.0052987	20.3688	0.00642591	0.0105355	0.0494335	0.0452832
KO 12week Sham AVERAGE	0.07201	999.658	52.3248	1.85824	0.19883	613.748	0.05378	0.441607	1.64631	1.23012
stdev	0.0127801	17.1894	16.2318	0.320102	0.00877864	29.0896	0.00270629	0.0163729	0.0407485	0.0361658
KO 12week OVX AVERAGE	0.04361	967.407	22.2437	1.0543	0.18375	585.437	0.05293	0.420301	1.60034	1.21858
stdev	0.0131897	16.4905	11.4206	0.334262	0.0080207	28.2804	0.00282884	0.017105	0.0549195	0.0517979
KO 12week OVX+OGP AVERAGE	0.0444889	977.117	24.893	1.13646	0.1734	558.53	0.0508	0.40226	1.59367	1.23206
stdev	0.0146668	31.1424	11.7328	0.365941	0.0123959	37.1339	0.0059165	0.0239849	0.0620809	0.0578484
normaled data (veh=1)							W	L(from Yankel)	I	J
	BV/TV	Tb.TMD	Tb.Conn.D	Tb.N (PL)	cortical Th.	cort vBMD	Tb.Th	BA/TA	CT.Dia.Dia	CT.Med.Dia
Bitya_CBD2_12w_sh1	1.9798	0.994819	4.40161	2.32391	1.01276	1.04251	0.872002	1.0204	0.98718	0.979696
Bitya_CBD2_12w_sh2	2.32744	0.994524	5.28743	2.68132	0.969048	1.0216	0.906883	0.987628	0.977889	0.981936
Bitya_CBD2_12w_sh3	1.5968	1.0318	2.37475	1.82088	1.0421	1.10841	0.911243	1.05166	0.973803	0.955423
Bitya_CBD2_12w_sh4	2.32155	0.999976	6.87354	2.55626	0.974043	1.02695	0.915603	0.99147	0.979891	0.982602
Bitya_CBD2_12w_sh5	2.23906	0.998502	5.08141	2.48816	1.0471	1.02257	0.889443	1.01116	1.02136	1.01701
Bitya_CBD2_12w_sh7	1.04882	0.950325	1.44723	1.45148	1.04522	1.07315	0.701962	1.04417	0.976798	0.96102
Bitya_CBD2_12w_sh8	2.61616	0.996292	7.96903	2.86913	1.03898	1.07072	0.965743	1.04866	0.998287	0.98053
BITYA_OGPRCC_V_1784	0.942761	1.00036	0.539427	0.905623	1.01338	0.965966	1.04204	0.999993	0.982634	0.982374
BITYA_OGPRCC_V_1758	0.901515	0.961953	0.555153	1.00649	0.945322	0.897482	0.943943	0.917135	1.0674	1.09822
BITYA_OGPRCC_V_1_2	1.19024	0.987262	2.25899	1.14118	1.00089	0.993651	1.00498	1.01867	0.983424	0.976587
BITYA_OGPRCC_V_2_1	0.707071	1.00109	0.510821	0.641581	0.959058	0.974223	1.06602	0.985611	0.9842	0.988976
BITYA_OGPRCC_V_2_2	1.46128	1.03126	1.00726	1.36796	1.05459	1.09929	1.07038	1.07519	0.976782	0.949948
BITYA_OGPRCC_V_1785	0.830808	0.99918	0.73138	0.869432	0.992151	1.02984	1.00062	1.00612	0.973986	0.971601
BITYA_OGPRCC_V_1760	0.96633	1.0189	1.39697	1.06773	1.03461	1.03955	0.872002	0.99728	1.03157	1.03229
BITYA_OGPRCC_10ng_1799	2.22727	1.07746	2.00565	1.95408	1.04585	1.06991	1.2535	1.0181	1.02038	1.0135
BITYA_OGPRCC_10ng_1779	1.30219	0.983142	1.8935	1.12341	1.02649	1.02498	1.1554	1.00177	1.02348	1.02256
BITYA_OGPRCC_10ng_1759	1.54966	1.0108	2.80615	1.68961	0.979038	0.957952	0.939583	0.940832	1.06305	1.08498
BITYA_OGPRCC_10ng_1777	1.83838	1.02449	2.07827	1.40201	0.97779	1.04319	1.308	0.996104	0.984029	0.985128
BITYA_OGPRCC_10ng_1793	1.00168	1.06363	1.09344	1.05531	0.992151	1.05558	1.01152	0.997472	0.988797	0.989423
BITYA_OGPRCC_10ng_1763	1.25505	1.04524	1.11309	1.16088	0.989029	1.04295	1.08346	1.01149	0.968265	0.964021
BITYA_OGPRCC_10ng_cage4	1.03704	1.03641	1.33693	1.04803	0.945946	1.02206	0.981003	1.00189	0.967834	0.966923
BITYA_12wSHAM_CB2KO_1c1	1.80463	1.02522	2.45614	1.87622	1.10803	1.01211	1.05989	1.02553	1.07924	1.0691
BITYA_12wSHAM_CB2KO_1c2	2.07292	0.995375	4.04376	2.32628	0.99483	0.957882	0.920083	0.976062	1.01358	1.02225
BITYA_12wSHAM_CB2KO_1c3	2.11419	1.05959	2.84845	2.17063	1.11619	1.09765	1.03722	1.08306	1.03048	0.998885
BITYA_12wSHAM_CB2KO_1c4	1.73584	1.03951	2.33336	1.76107	1.10694	1.10162	1.06556	1.08241	1.01537	0.984471
BITYA_12wSHAM_CB2KO_1c5	1.60055	1.03272	2.36952	1.74267	1.05469	1.0058	1.00321	1.01254	1.04003	1.0352
BITYA_12wSHAM_CB2KO_2c1	1.5501	1.01673	1.48556	1.58949	1.09878	1.06306	1.04289	1.08608	1.01618	0.983875
BITYA_12wSHAM_CB2KO_2c2	1.28411	1.04233	1.64823	1.35512	1.15374	1.0855	1.05044	1.07689	1.0657	1.03547
BITYA_12wSHAM_CB2KO_2c3	1.56845	1.0405	2.40679	1.71526	1.08517	1.0869	0.978651	1.07254	1.00768	0.980737
BITYA_12wSHAM_CB2KO_2c4	1.21761	1.03399	1.7156	1.40548	1.0166	1.00276	0.948422	1.01867	1.00512	0.998211
BITYA_12wSHAM_CB2KO_2c5	1.56386	1.04743	2.21609	1.68311	1.08571	1.07031	1.05422	1.07314	1.01388	0.986546
BITYA_12wOVX_CB2KO_3c1	1.22678	1.00924	1.06226	1.17196	1.03347	1.00883	1.09768	1.01925	1.02573	1.01846
BITYA_12wOVX_CB2KO_3c2	0.658106	0.995375	0.537812	0.644693	0.98068	0.978918	0.991876	0.976776	0.997177	1.00545
BITYA_12wOVX_CB2KO_3c3	0.919514	1.00386	0.998065	0.899365	1.00571	1.02005	1.00888	1.01275	0.985674	0.981016
BITYA_12wOVX_CB2KO_3c4	0.791103	0.991697	0.556334	0.80755	1.00299	1.0259	0.923862	1.01051	0.982056	0.97822
BITYA_12wOVX_CB2KO_3c5	0.869067	0.97529	0.631974	0.844636	0.932245	0.976113	0.976762	0.978085	0.955351	0.962821
BITYA_12wOVX_CB2KO_4c1	1.19697	0.994951	1.88218	1.3757	1.06993	1.03852	0.95409	1.04489	1.01733	1.00055
BITYA_12wOVX_CB2KO_4c2	1.58909	0.985615	1.80302	1.52319	0.995918	1.0675	0.988097	1.05693	0.938183	0.918535
BITYA_12wOVX_CB2KO_4c3	0.807154	1.00174	0.787452	0.81732	0.95619	0.931003	0.95598	0.933545	1.03871	1.06335
BITYA_12wOVX_CB2KO_4c4	1.25659	1.03965	1.27103	1.29375	1.05578	1.03548	1.041	1.02258	1.02916	1.02062
BITYA_12wOVX_CB2KO_4c5	0.685623	1.00259	0.469878	0.621834	0.967075	0.917681	1.06178	0.94468	1.03061	1.05098
BITYA_12wOVX_CB2KO_1OGP2	0.525109	0.973168	0.430608	0.56151	0.937143	0.973542	0.878519	0.978037	0.963061	0.970613
BITYA_12wOVX_CB2KO_1OGP3	1.59596	1.06652	1.60722	1.47965	1.02639	0.999252	1.19214	1.00202	1.02712	1.02627
BITYA_12wOVX_CB2KO_1OGP4	0.81174	0.990707	0.971158	0.855354	0.87619	0.870702	0.925751	0.87504	1.03422	1.07996
BITYA_12wOVX_CB2KO_1OGP6	0.999771	0.980665	1.05567	1.23314	0.812517	0.876078	0.806726	0.886389	0.933599	0.971204
BITYA_12wOVX_CB2KO_2OGP1	0.901169	0.981372	0.882414	0.896329	0.94585	0.906462	1.00699	0.954078	1.00605	1.02257
BITYA_12wOVX_CB2KO_2OGP3	1.50654	1.04248	2.21032	1.66755	0.988844	0.979151	0.98054	0.969353	1.03745	1.04882
BITYA_12wOVX_CB2KO_2OGP5	0.846136	1.03512	0.632342	0.810775	0.978503	0.999953	1.03722	0.989362	0.991051	0.994778
BITYA_12wOVX_CB2KO_2OGP6	0.963082	1.00938	1.10307	1.03054	0.920816	0.923291	0.912526	0.910276	1.02063	1.05322
BITYA_12wOVX_CB2KO_2OGP7	1.03187	1.01093	1.17915	1.16646	1.0068	1.05792	0.897412	1.04913	0.949301	0.932161
									I	J
	BV/TV	Tb.TMD	Tb.Conn.D	Tb.N (PL)	cortical Th.	cort vBND	Tb.Th	BA/TA	CT.Dia.Dia	CT.Med.Dia
WT 12week Sham AVERAGE	2.01852	0.995177	4.77643	2.31302	1.01846	1.05227	0.880411	1.02216	0.987887	0.979745
stdev	0.53428	0.0237654	2.30712	0.503208	0.0340666	0.0328809	0.0838328	0.0268196	0.016903	0.0197675
WT 12week OVX AVERAGE	1	1	1	1	1	1	1	1	1	1
stdev	0.250836	0.0221581	0.640853	0.228903	0.0389126	0.0641431	0.071451	0.0467638	0.0355468	0.04997
WT 12week OVX+OGP AVERAGE	1.45875	1.03445	1.761	1.34762	0.993756	1.03095	1.10464	0.99538	1.00226	1.00379
stdev	0.446425	0.031917	0.621245	0.353094	0.0330844	0.0361969	0.140085	0.0252958	0.0349491	0.0418997
KO 12week Sham AVERAGE	1.65123	1.03334	2.35235	1.76253	1.08207	1.04836	1.01606	1.05069	1.02873	1.00947
stdev	0.293055	0.0177685	0.729726	0.303616	0.0477749	0.0496887	0.0511296	0.0389552	0.0254624	0.0296787
KO 12week OVX AVERAGE	1	1	1	1	1	1	1	1	1	1
stdev	0.302446	0.0170461	0.513433	0.317046	0.0436501	0.0483065	0.0534449	0.040697	0.0343173	0.0425069
KO 12week OVX+OGP AVERAGE	1.02015	1.01004	1.11911	1.07792	0.943673	0.954039	0.959758	0.957076	0.995831	1.01107
stdev	0.336318	0.0321917	0.527466	0.347093	0.0674605	0.0634293	0.11178	0.0570659	0.0387922	0.0474722
WT
ttest OVX vs Sham	0.000648434	0.701402	0.00129313	4.04344e-05	0.363508	0.0791272	0.0140258	0.298046	0.431372	0.338341
ttest OVX vs OVX+OGP	0.0353828	0.0369827	0.0435376	0.049392	0.751934	0.288059	0.103756	0.82203	0.906407	0.880341
ttest OVX+OGP vs Sham	0.054834	0.0227461	0.00589812	0.00133461	0.193785	0.271073	0.0034259	0.0786373	0.34656	0.194816
CB2KO
ttest OVX vs Sham (#)	0.000117861	0.0004491	0.000145628	3.23449e-05	0.000820689	0.0405651	0.501089	0.0107357	0.0476209	0.570463
ttest OVX vs OVX+OGP (*)	0.892196	0.400392	0.624569	0.615537	0.0432516	0.0915547	0.322632	0.07408	0.806619	0.598716
ttest OVX+OGP vs Sham (#)	0.000415448	0.0639159	0.000631744	0.000261982	7.16583e-05	0.00207579	0.168666	0.000581559	0.0412776	0.930399
normaled data (Sham=1)							W	L(from Yankel)	I	J
	BV/TV	Tb.TMD	Tb.Conn.D	Tb.N (PL)	cortical Th.	cort vBMD	Tb.Th	BA/TA	CT.Dia.Dia	CT.Med.Dia
Bitya_CBD2_12w_sh1	0.980817	0.99964	0.921528	1.00471	0.994395	0.990724	0.990449	0.998275	0.999285	0.99995
Bitya_CBD2_12w_sh2	1.15304	0.999344	1.10698	1.15923	0.95148	0.97085	1.03007	0.966212	0.989879	1.00224
Bitya_CBD2_12w_sh3	0.791076	1.0368	0.497182	0.787232	1.02321	1.05335	1.03502	1.02886	0.985743	0.975175
Bitya_CBD2_12w_sh4	1.15013	1.00482	1.43905	1.10516	0.956385	0.975934	1.03997	0.969971	0.991906	1.00292
Bitya_CBD2_12w_sh5	1.10926	1.00334	1.06385	1.07572	1.02811	0.971775	1.01026	0.989232	1.03388	1.03804
Bitya_CBD2_12w_sh7	0.5196	0.954931	0.302993	0.627526	1.02627	1.01984	0.797312	1.02153	0.988775	0.980887
Bitya_CBD2_12w_sh8	1.29608	1.00112	1.66841	1.24042	1.02014	1.01753	1.09692	1.02592	1.01053	1.0008
BITYA_OGPRCC_V_1784	0.467056	1.00521	0.112935	0.391533	0.995008	0.917983	1.18359	0.978309	0.994683	1.00268
BITYA_OGPRCC_V_1758	0.446622	0.966616	0.116228	0.435139	0.928184	0.852901	1.07216	0.897247	1.08049	1.12092
BITYA_OGPRCC_V_1_2	0.589658	0.992047	0.472945	0.493374	0.982747	0.944292	1.14149	0.996584	0.995483	0.996776
BITYA_OGPRCC_V_2_1	0.350292	1.00594	0.106946	0.277378	0.941671	0.92583	1.21082	0.964239	0.996269	1.00942
BITYA_OGPRCC_V_2_2	0.723937	1.03626	0.210882	0.591419	1.03547	1.04468	1.21578	1.05188	0.988759	0.969586
BITYA_OGPRCC_V_1785	0.411593	1.00402	0.153123	0.375886	0.974164	0.97868	1.13654	0.984299	0.985929	0.991688
BITYA_OGPRCC_V_1760	0.478732	1.02384	0.292472	0.461618	1.01585	0.987911	0.990449	0.975655	1.04422	1.05363
BITYA_OGPRCC_10ng_1799	1.10342	1.08268	0.419905	0.844818	1.02689	1.01676	1.42377	0.99602	1.0329	1.03445
BITYA_OGPRCC_10ng_1779	0.645121	0.987907	0.396425	0.485689	1.00788	0.974064	1.31235	0.980047	1.03603	1.0437
BITYA_OGPRCC_10ng_1759	0.767723	1.0157	0.587501	0.730478	0.961289	0.910367	1.06721	0.920431	1.07609	1.10741
BITYA_OGPRCC_10ng_1777	0.910759	1.02945	0.435109	0.60614	0.960063	0.991373	1.48567	0.974504	0.996095	1.00549
BITYA_OGPRCC_10ng_1793	0.496247	1.06878	0.228925	0.456248	0.974164	1.00314	1.14892	0.975843	1.00092	1.00988
BITYA_OGPRCC_10ng_1763	0.621768	1.0503	0.233037	0.501891	0.971098	0.991142	1.23063	0.989561	0.980137	0.983951
BITYA_OGPRCC_10ng_cage4	0.513761	1.04143	0.279901	0.4531	0.928797	0.971295	1.11426	0.980165	0.979702	0.986912
BITYA_12wSHAM_CB2KO_1c1	1.0929	0.992143	1.04412	1.0645	1.02399	0.965421	1.04314	0.976049	1.0491	1.05907
BITYA_12wSHAM_CB2KO_1c2	1.25538	0.963262	1.71903	1.31985	0.919378	0.913697	0.905541	0.928971	0.985275	1.01265
BITYA_12wSHAM_CB2KO_1c3	1.28038	1.0254	1.2109	1.23154	1.03153	1.04702	1.02083	1.0308	1.00171	0.989509
BITYA_12wSHAM_CB2KO_1c4	1.05124	1.00597	0.991927	0.999171	1.02298	1.05081	1.04872	1.03019	0.987013	0.975231
BITYA_12wSHAM_CB2KO_1c5	0.96931	0.999398	1.0073	0.988731	0.974702	0.959401	0.987356	0.963685	1.01099	1.02548
BITYA_12wSHAM_CB2KO_2c1	0.938759	0.98393	0.631521	0.901821	1.01544	1.01402	1.0264	1.03368	0.987803	0.97464
BITYA_12wSHAM_CB2KO_2c2	0.77767	1.00871	0.700673	0.768846	1.06624	1.03543	1.03384	1.02494	1.03594	1.02575
BITYA_12wSHAM_CB2KO_2c3	0.949868	1.00693	1.02314	0.973179	1.00287	1.03676	0.963183	1.02079	0.979544	0.971531
BITYA_12wSHAM_CB2KO_2c4	0.737398	1.00063	0.729312	0.797421	0.939496	0.956503	0.933433	0.969527	0.977056	0.988842
BITYA_12wSHAM_CB2KO_2c5	0.947091	1.01363	0.942077	0.954936	1.00337	1.02093	1.03756	1.02136	0.985573	0.977287
BITYA_12wOVX_CB2KO_3c1	0.742952	0.976676	0.451573	0.66493	0.955087	0.9623	1.08033	0.970071	0.997093	1.0089
BITYA_12wOVX_CB2KO_3c2	0.398556	0.963262	0.228628	0.365776	0.906302	0.933763	0.976199	0.92965	0.969333	0.996014
BITYA_12wOVX_CB2KO_3c3	0.556867	0.971474	0.424284	0.510268	0.929437	0.973001	0.992934	0.963889	0.958151	0.971809
BITYA_12wOVX_CB2KO_3c4	0.4791	0.959703	0.236502	0.458175	0.926922	0.978575	0.90926	0.96176	0.954634	0.969038
BITYA_12wOVX_CB2KO_3c5	0.526316	0.943825	0.268656	0.479217	0.86154	0.931087	0.961324	0.930896	0.928675	0.953784
BITYA_12wOVX_CB2KO_4c1	0.724899	0.962851	0.800127	0.780524	0.988784	0.990614	0.939011	0.994482	0.988927	0.991158
BITYA_12wOVX_CB2KO_4c2	0.962366	0.953817	0.766476	0.864205	0.920384	1.01826	0.97248	1.00594	0.911986	0.909913
BITYA_12wOVX_CB2KO_4c3	0.488821	0.969421	0.334751	0.463718	0.883669	0.888058	0.94087	0.888505	1.00971	1.05337
BITYA_12wOVX_CB2KO_4c4	0.761005	1.0061	0.540325	0.734028	0.975708	0.987716	1.02454	0.973241	1.00043	1.01104
BITYA_12wOVX_CB2KO_4c5	0.41522	0.970242	0.199748	0.352807	0.893728	0.875351	1.045	0.899103	1.00183	1.04111
BITYA_12wOVX_CB2KO_1OGP2	0.318011	0.941771	0.183055	0.318581	0.866066	0.928635	0.864634	0.93085	0.936169	0.961502
BITYA_12wOVX_CB2KO_1OGP3	0.966532	1.03211	0.68324	0.839504	0.948549	0.953159	1.1733	0.953676	0.998437	1.01664
BITYA_12wOVX_CB2KO_1OGP4	0.491598	0.958744	0.412846	0.485298	0.809737	0.830538	0.911119	0.832822	1.00534	1.06982
BITYA_12wOVX_CB2KO_1OGP6	0.605471	0.949026	0.448774	0.699641	0.750893	0.835666	0.793975	0.843623	0.90753	0.962089
BITYA_12wOVX_CB2KO_2OGP1	0.545758	0.94971	0.37512	0.508546	0.874114	0.864649	0.991075	0.908047	0.977957	1.01297
BITYA_12wOVX_CB2KO_2OGP3	0.912373	1.00884	0.939621	0.94611	0.913846	0.933985	0.965043	0.922585	1.00848	1.03898
BITYA_12wOVX_CB2KO_2OGP5	0.512429	1.00172	0.268813	0.460005	0.90429	0.953828	1.02083	0.941629	0.963378	0.985441
BITYA_12wOVX_CB2KO_2OGP6	0.583252	0.976813	0.468923	0.584693	0.850978	0.880701	0.898103	0.866359	0.992136	1.04333
BITYA_12wOVX_CB2KO_2OGP7	0.624913	0.978318	0.501265	0.661809	0.930443	1.00912	0.883228	0.998512	0.922793	0.923411
	BV/TV	Tb.TMD	Tb.Conn.D	Tb.N (PL)	cortical Th.	cort vBND	Tb.Th	BA/TA	CT.Dia.Dia	CT.Med.Dia
WT 12week Sham AVERAGE	1	1	1	1	1	1	1	1	1	1
stdev	0.264689	0.0238805	0.483022	0.217554	0.033449	0.0312476	0.09522	0.026238	0.0171103	0.0201762
WT 12week OVX AVERAGE	0.495413	1.00485	0.209361	0.432335	0.981871	0.950326	1.13583	0.978316	1.01226	1.02067
stdev	0.124267	0.0222655	0.13417	0.0989627	0.0382072	0.0609568	0.0811563	0.0457498	0.0359826	0.0510031
WT 12week OVX+OGP AVERAGE	0.722686	1.03947	0.368686	0.582624	0.97574	0.979735	1.25469	0.973796	1.01455	1.02454
stdev	0.221165	0.0320717	0.130065	0.152655	0.0324846	0.0343989	0.159114	0.0247472	0.0353776	0.0427659
KO 12week Sham AVERAGE	1	1	1	1	1	1	1	1	1	1
stdev	0.177477	0.0171953	0.310212	0.172261	0.0441515	0.0473967	0.0503215	0.0370757	0.0247514	0.0294002
KO 12week OVX AVERAGE	0.60561	0.967737	0.425107	0.567365	0.924156	0.953872	0.984195	0.951753	0.972077	0.990614
stdev	0.183165	0.0164961	0.218264	0.179881	0.0403395	0.0460782	0.0526002	0.0387335	0.0333591	0.0421079
KO 12week OVX+OGP AVERAGE	0.617815	0.977451	0.47574	0.611576	0.872102	0.910031	0.944589	0.9109	0.968024	1.00158
stdev	0.203678	0.0311531	0.224229	0.196929	0.062344	0.0605035	0.110013	0.0543127	0.037709	0.0470266
WT
ttest OVX vs Sham	0.000648434	0.701402	0.00129313	4.04344e-05	0.363508	0.0791272	0.0140258	0.298046	0.431372	0.338341
ttest OVX vs OVX+OGP	0.0353828	0.0369827	0.0435376	0.049392	0.751934	0.288059	0.103756	0.82203	0.906407	0.880341
ttest OVX+OGP vs Sham	0.054834	0.0227461	0.00589812	0.00133461	0.193785	0.271073	0.0034259	0.0786373	0.34656	0.194816
CB2KO
ttest OVX vs Sham	0.000117861	0.0004491	0.000145628	3.23449e-05	0.000820689	0.0405651	0.501089	0.0107357	0.0476209	0.570463
ttest OVX vs OVX+OGP	0.892196	0.400392	0.624569	0.615537	0.0432516	0.0915547	0.322632	0.07408	0.806619	0.598716
ttest OVX+OGP vs Sham	0.000415448	0.0639159	0.000631744	0.000261982	7.16583e-05	0.00207579	0.168666	0.000581559	0.0412776	0.930399
real data
	R (became S)	Q (became R)	S (becme T)	V (W)	K (L)	G	W (X)	L(from Yankel) (K)	I	J
	BV/TV	Tb.TMD	Tb.Conn.D	Tb.N (PL)	cortical Th.	cort vBMD	Tb.Th	BA/TA	CT.Dia.Dia	CT.Med.Dia
Bitya_CBD2_12w_sh1	0.0336	923.935	25.1893	1.0852	0.1622	586.642	0.04	0.42499	1.39631	1.05881
Bitya_CBD2_12w_sh2	0.0395	923.661	30.2586	1.2521	0.1552	574.874	0.0416	0.41134	1.38317	1.06123
Bitya_CBD2_12w_sh3	0.0271	958.28	13.5901	0.8503	0.1669	623.723	0.0418	0.43801	1.37739	1.03257
Bitya_CBD2_12w_sh4	0.0394	928.724	39.3355	1.1937	0.156	577.884	0.042	0.41294	1.386	1.06195
Bitya_CBD2_12w_sh5	0.038	927.356	29.0796	1.1619	0.1677	575.421	0.0408	0.42114	1.44466	1.09914
Bitya_CBD2_12w_sh7	0.0178	882.611	8.2821	0.6778	0.1674	603.883	0.0322	0.43489	1.38163	1.03862
Bitya_CBD2_12w_sh8	0.0444	925.303	45.6047	1.3398	0.1664	602.514	0.0443	0.43676	1.41202	1.05971
Bitya_CBD2_12w_OVX_Veh1	0.0178	945.418	8.949	0.3928	0.1598	587.463	0.0562	0.425663	1.37398	1.04127
Bitya_CBD2_12w_OVX_Veh2	0.0138	922.156	8.4146	0.3871	0.1539	579.389	0.0423	0.411614	1.37993	1.05849
Bitya_CBD2_12w_OVX_Veh3	0.0283	977.163	17.8364	0.7554	0.1715	581.168	0.0487	0.413549	1.48176	1.13474
Bitya_CBD2_12w_OVX_Veh4	0.0147	968.816	7.5101	0.4514	0.1518	575.284	0.0391	0.404823	1.38171	1.06596
Bitya_CBD2_12w_OVX_Veh5	0.0219	942.681	11.7777	0.6276	0.1586	583.768	0.0414	0.419297	1.38446	1.05501
Bitya_CBD2_12w_OVX_Veh6	0.0224	993.583	7.7891	0.4481	0.1628	601.42	0.0637	0.427475	1.39366	1.05452
Bitya_CBD2_12w_OVX_Veh7	0.0262	1004.8	7.6454	0.6425	0.1566	573.779	0.0525	0.406239	1.45634	1.1222
Bitya_CBD2_12w_OVX_Veh8	0.0209	988.11	12.3302	0.5248	0.1621	604.704	0.0509	0.423001	1.39514	1.05976
CBD WT 12week Sham AVERAGE	0.0342571	924.267	27.3343	1.08011	0.163114	592.135	0.0403857	0.425724	1.39731	1.05886
stdev	0.0090675	22.072	13.2031	0.234984	0.00545601	18.5028	0.00384553	0.0111702	0.0239084	0.0213638
CBD WT 12week OVX AVERAGE	0.02075	967.841	10.2816	0.528713	0.159637	585.872	0.04935	0.416458	1.40587	1.07399
stdev	0.00513225	28.6617	3.57801	0.133701	0.00611157	11.5003	0.00831144	0.00869068	0.0401837	0.0344981
Veh = 1
	R (became S)	Q (became R)	S (becme T)	V (W)	K (L)	G	W (X)	L(from Yankel) (K)	I	J
	BV/TV	Tb.TMD	Tb.Conn.D	Tb.N (PL)	cortical Th.	cort vBMD	Tb.Th	BA/TA	CT.Dia.Dia	CT.Med.Dia
Bitya_CBD2_12w_sh1	1.61928	0.954635	2.44995	2.05253	1.01605	1.00131	0.810537	1.02049	0.993199	0.985861
Bitya_CBD2_12w_sh2	1.90361	0.954352	2.943	2.36821	0.972203	0.981228	0.842958	0.987712	0.98385	0.988115
Bitya_CBD2_12w_sh3	1.30602	0.990121	1.32179	1.60825	1.04549	1.06461	0.847011	1.05175	0.97974	0.961435
Bitya_CBD2_12w_sh4	1.8988	0.959583	3.82583	2.25775	0.977214	0.986366	0.851064	0.991554	0.985865	0.988785
Bitya_CBD2_12w_sh5	1.83133	0.958169	2.82832	2.1976	1.05051	0.982162	0.826748	1.01124	1.02759	1.02341
Bitya_CBD2_12w_sh7	0.857831	0.911938	0.805529	1.28198	1.04863	1.03074	0.652482	1.04426	0.982753	0.967068
Bitya_CBD2_12w_sh8	2.13976	0.956049	4.43558	2.53408	1.04236	1.02841	0.89767	1.04875	1.00437	0.986701
Bitya_CBD2_12w_OVX_Veh1	0.857831	0.976831	0.870393	0.742937	1.00102	1.00272	1.1388	1.0221	0.977317	0.969536
Bitya_CBD2_12w_OVX_Veh2	0.66506	0.952797	0.818416	0.732156	0.964059	0.988935	0.857143	0.988371	0.981543	0.985565
Bitya_CBD2_12w_OVX_Veh3	1.36386	1.00963	1.73479	1.42875	1.07431	0.991972	0.986829	0.993015	1.05398	1.05656
Bitya_CBD2_12w_OVX_Veh4	0.708434	1.00101	0.730443	0.853772	0.950904	0.981929	0.7923	0.972063	0.982812	0.992518
Bitya_CBD2_12w_OVX_Veh5	1.05542	0.974004	1.14552	1.18703	0.993501	0.996409	0.838906	1.00682	0.98477	0.982328
Bitya_CBD2_12w_OVX_Veh6	1.07952	1.0266	0.757579	0.847531	1.01981	1.02654	1.29078	1.02645	0.991313	0.981867
Bitya_CBD2_12w_OVX_Veh7	1.26265	1.03819	0.743603	1.21522	0.980973	0.97936	1.06383	0.975462	1.0359	1.04488
Bitya_CBD2_12w_OVX_Veh8	1.00723	1.02094	1.19925	0.9926	1.01543	1.03214	1.03141	1.01571	0.992368	0.986746
CBD WT 12week Sham AVERAGE	1.65095	0.954978	2.65857	2.04291	1.02178	1.01069	0.818353	1.02225	0.993909	0.985911
stdev	0.436988	0.0228054	1.28415	0.444445	0.0341775	0.0315816	0.0779236	0.0268219	0.0170061	0.0198919
CBD WT 12week OVX AVERAGE	1	1	1	1	1	1	1	1	1	1
stdev	0.247337	0.0296141	0.348002	0.252879	0.038284	0.0196293	0.168418	0.0208681	0.0285827	0.0321214
	R (became S)	Q (became R)	S (becme T)	V (W)	K (L)	G	W (X)	L(from Yankel) (K)	I	J
	BV/TV	Tb.TMD	Tb.Conn.D	Tb.N (PL)	cortical Th.	cort vBMD	Tb.Th	BA/TA	CT.Dia.Dia	CT.Med.Dia
BITYA_OGPRCC_V_1784	0.942761	1.00036	0.539427	0.905623	1.01338	0.965966	1.04204	0.999993	0.982634	0.982374
BITYA_OGPRCC_V_1758	0.901515	0.961953	0.555153	1.00649	0.945322	0.897482	0.943943	0.917135	1.0674	1.09822
BITYA_OGPRCC_V_1_2	1.19024	0.987262	2.25899	1.14118	1.00089	0.993651	1.00498	1.01867	0.983424	0.976587
BITYA_OGPRCC_V_2_1	0.707071	1.00109	0.510821	0.641581	0.959058	0.974223	1.06602	0.985611	0.9842	0.988976
BITYA_OGPRCC_V_2_2	1.46128	1.03126	1.00726	1.36796	1.05459	1.09929	1.07038	1.07519	0.976782	0.949948
BITYA_OGPRCC_V_1785	0.830808	0.99918	0.73138	0.869432	0.992151	1.02984	1.00062	1.00612	0.973986	0.971601
BITYA_OGPRCC_V_1760	0.96633	1.0189	1.39697	1.06773	1.03461	1.03955	0.872002	0.99728	1.03157	1.03229
BITYA_OGPRCC_10ng_1799	2.22727	1.07746	2.00565	1.95408	1.04585	1.06991	1.2535	1.0181	1.02038	1.0135
BITYA_OGPRCC_10ng_1779	1.30219	0.983142	1.8935	1.12341	1.02649	1.02498	1.1554	1.00177	1.02348	1.02256
BITYA_OGPRCC_10ng_1759	1.54966	1.0108	2.80615	1.68961	0.979038	0.957952	0.939583	0.940832	1.06305	1.08498
BITYA_OGPRCC_10ng_1777	1.83838	1.02449	2.07827	1.40201	0.97779	1.04319	1.308	0.996104	0.984029	0.985128
BITYA_OGPRCC_10ng_1793	1.00168	1.06363	1.09344	1.05531	0.992151	1.05558	1.01152	0.997472	0.988797	0.989423
BITYA_OGPRCC_10ng_1763	1.25505	1.04524	1.11309	1.16088	0.989029	1.04295	1.08346	1.01149	0.968265	0.964021
BITYA_OGPRCC_10ng_cage4	1.03704	1.03641	1.33693	1.04803	0.945946	1.02206	0.981003	1.00189	0.967834	0.966923
WT 12week OVX Veh AVERAGE	1	1	1	1	1	1	1	1	1	1
stdev	0.250836	0.0221581	0.640853	0.228903	0.0389126	0.0641431	0.071451	0.0467638	0.0355468	0.04997
WT 12week OVX+OGP AVERAGE	1.45875	1.03445	1.761	1.34762	0.993756	1.03095	1.10464	0.99538	1.00226	1.00379
stdev	0.446425	0.031917	0.621245	0.353094	0.0330844	0.0361969	0.140085	0.0252958	0.0349491	0.0418997
WT
Ttest OVX vs Sham (#)	0.00509657	0.00279063	0.00994363	0.000132088	0.287673	0.699369	0.00067107	0.296258	0.689789	0.501458
Ttest OVX vs OVX+OGP (*)	0.0353828	0.0369827	0.0435376	0.049392	0.751934	0.288059	0.103756	0.82203	0.906407	0.880341
Ttest OVX+OGP vs Sham (#)	0.431515	0.000170741	0.121845	0.00707629	0.145045	0.286405	0.000492586	0.0778047	0.580104	0.327905
	R (became S)	Q (became R)	S (becme T)	V (W)	K (L)	G	W (X)	L(from Yankel) (K)	I	J
	BV/TV	Tb.TMD	Tb.Conn.D	Tb.N (PL)	cortical Th.	cort vBMD	Tb.Th	BA/TA	CT.Dia.Dia	CT.Med.Dia
CBD WT 12week Sham AVERAGE	1.65095	0.954978	2.65857	2.04291	1.02178	1.01069	0.818353	1.02225	0.993909	0.985911
stdev	0.436988	0.0228054	1.28415	0.444445	0.0341775	0.0315816	0.0779236	0.0268219	0.0170061	0.0198919
-	1.21396	0.932173	1.37442	1.59847	0.987602	0.979108	0.740429	0.995429	0.976903	0.966019
+	2.08793	0.977784	3.94272	2.48736	1.05596	1.04227	0.896276	1.04907	1.01092	1.0058
KO 12week Sham AVERAGE	1.65123	1.03334	2.35235	1.76253	1.08207	1.04836	1.01606	1.05069	1.02873	1.00947
stdev	0.293055	0.0177685	0.729726	0.303616	0.0477749	0.0496887	0.0511296	0.0389552	0.0254624	0.0296787
-	1.35817	1.01557	1.62262	1.45892	1.03429	0.99867	0.964929	1.01174	1.00326	0.979796
+	1.94428	1.05111	3.08207	2.06615	1.12984	1.09805	1.06719	1.08965	1.05419	1.03915

## Sheet: BVTV
	%BV/TV	average	stdev	% vs veh					12weeks	average	stdev		% vs veh
BITYA_OGPRCC_V_1784	0.016	0.01655	0.00411756	0.966767	1	0.248795	WT veh		WT Sham	0.0342571	0.0090675		2.06992	0.547885
BITYA_OGPRCC_V_1758	0.0153			0.924471					WT veh	0.01655	0.00411756		1	0.248795
BITYA_OGPRCC_V_1_1	0.0136			0.821752					WT 10ng H4(99-103)	0.02385	0.00746898		1.44109	0.451298
BITYA_OGPRCC_V_1_2	0.0202			1.22054					WT 100ng H4(99-103)	0.026875	0.0141439		1.62387	0.854618
BITYA_OGPRCC_V_2_1	0.012			0.725076					CB2-/- Sham	0.07201	0.0127801		1.65123	0.293055
BITYA_OGPRCC_V_2_2	0.0248			1.49849					CB2-/- veh	0.04361	0.0131897		1	0.302446
BITYA_OGPRCC_V_1785	0.0141			0.851964					CB2-/- H4(99-103)	0.0444889	0.0146668		1.02015	0.336318
BITYA_OGPRCC_V_1760	0.0164			0.990937
BITYA_OGPRCC_10ng_1799	0.0378	0.02385	0.00746898	2.28399	1.44109	0.451298	WT 10ng H4(99-103)
BITYA_OGPRCC_10ng_1779	0.0221			1.33535
BITYA_OGPRCC_10ng_1783	0.0175			1.0574
BITYA_OGPRCC_10ng_1759	0.0263			1.58912
BITYA_OGPRCC_10ng_1777	0.0312			1.8852
BITYA_OGPRCC_10ng_1793	0.017			1.02719
BITYA_OGPRCC_10ng_1763	0.0213			1.28701
BITYA_OGPRCC_10ng_cage4	0.0176			1.06344
BITYA_OGPRCC_100ng_1726	0.0334	0.026875	0.0141439	2.01813	1.62387	0.854618	WT 100ng H4(99-103)
BITYA_OGPRCC_100ng_1797	0.0144			0.870091
BITYA_OGPRCC_100ng_1796	0.0189			1.14199
BITYA_OGPRCC_100ng_1762	0.022			1.32931
BITYA_OGPRCC_100ng_1798	0.0591			3.571
BITYA_OGPRCC_100ng_1792	0.0223			1.34743
BITYA_OGPRCC_100ng_1755	0.0253			1.5287
BITYA_OGPRCC_100ng_1795	0.0196			1.18429
Bitya_CBD2_12w_sh1	0.0336	0.0342571	0.0090675	2.03021	2.06992	0.547885	WT Sham
Bitya_CBD2_12w_sh2	0.0395			2.38671
Bitya_CBD2_12w_sh3	0.0271			1.63746
Bitya_CBD2_12w_sh4	0.0394			2.38066
Bitya_CBD2_12w_sh5	0.038			2.29607
Bitya_CBD2_12w_sh7	0.0178			1.07553
Bitya_CBD2_12w_sh8	0.0444			2.68278
BITYA_12wOVX_CB2KO_1OGP2	0.0229	0.0444889	0.0146668	0.525109	1.02015	0.336318	CB2-/- H4(99-103)
BITYA_12wOVX_CB2KO_1OGP3	0.0696			1.59596
BITYA_12wOVX_CB2KO_1OGP4	0.0354			0.81174
BITYA_12wOVX_CB2KO_1OGP6	0.0436			0.999771										BV/TV
BITYA_12wOVX_CB2KO_2OGP1	0.0393			0.901169										12 weeks	12weeks
BITYA_12wOVX_CB2KO_2OGP3	0.0657			1.50654										sham	veh
BITYA_12wOVX_CB2KO_2OGP5	0.0369			0.846136										0.0336	0.016
BITYA_12wOVX_CB2KO_2OGP6	0.042			0.963082										0.0395	0.0153
BITYA_12wOVX_CB2KO_2OGP7	0.045			1.03187										0.0271	0.0136
BITYA_12wOVX_CB2KO_3c1	0.0535	0.04361	0.0131897	1.22678	1	0.302446	CB2-/- veh							0.0394	0.0202
BITYA_12wOVX_CB2KO_3c2	0.0287			0.658106										0.038	0.012
BITYA_12wOVX_CB2KO_3c3	0.0401			0.919514											0.0248
BITYA_12wOVX_CB2KO_3c4	0.0345			0.791103										0.0178	0.0141
BITYA_12wOVX_CB2KO_3c5	0.0379			0.869067										0.0444	0.0164
BITYA_12wOVX_CB2KO_4c1	0.0522			1.19697									average	0.0342571	0.01655
BITYA_12wOVX_CB2KO_4c2	0.0693			1.58909									ttest	0.000248832
BITYA_12wOVX_CB2KO_4c3	0.0352			0.807154									change	-0.516889
BITYA_12wOVX_CB2KO_4c4	0.0548			1.25659
BITYA_12wOVX_CB2KO_4c5	0.0299			0.685623
BITYA_12wSHAM_CB2KO_1c1	0.0787	0.07201	0.0127801	1.80463	1.65123	0.293055	CB2-/- Sham
BITYA_12wSHAM_CB2KO_1c2	0.0904			2.07292
BITYA_12wSHAM_CB2KO_1c3	0.0922			2.11419
BITYA_12wSHAM_CB2KO_1c4	0.0757			1.73584
BITYA_12wSHAM_CB2KO_1c5	0.0698			1.60055
BITYA_12wSHAM_CB2KO_2c1	0.0676			1.5501
BITYA_12wSHAM_CB2KO_2c2	0.056			1.28411
BITYA_12wSHAM_CB2KO_2c3	0.0684			1.56845
BITYA_12wSHAM_CB2KO_2c4	0.0531			1.21761
BITYA_12wSHAM_CB2KO_2c5	0.0682			1.56386

## Sheet: Sheet10
SPECIMEN	Sample#	Resolution	Length	BV/TV	vBMD	vBMD	TMD	Dia.Dia	Med.Dia	Cort.Th	Po.V	Po.diam	Polar	Areal	Mater prop	Mater prop	BV/TV	Conn.D	SMI	Tb.N (3D)	Tb.N (Pl)	Tb.Th (3D)	Sp (3D)	BV/TV	Conn.D	SMI	Tb.N (3D)	Tb.Th (3D)	Sp (3D)	BV/TV	Conn.D	SMI	Tb.N (3D)	Tb.Th (3D)	Sp (3D)
[name]	[name]	[micrometer]	[mm]	[%]	[mg HA/ccm]	[mg HA/ccm]	[mg HA/ccm]	[mm]	[mm]	[mm]	[%]	[mm]	[mm^4]	[mm^3]	[mg HA/ccm]	[mg HA/ccm]	[%]	[1/mm3]	[1]	[mm-1]	[mm-1]	[mm]	[mm]	[%]	[1/mm3]	[1]	[mm-1]	[mm]	[mm]	[%]	[1/mm3]	[1]	[mm-1]	[mm]	[mm]
PROJECT
					Here CORT and TRAB parameters are well aligned for scripts after March 2014!!!
BITYA_OGPRCC_V_1784	2722		15.47	0.439	499.429	543.569	1301.61	1.38988	1.0617	0.1623	0	! 0.000	0.25238	0.18394	-2.3754	929.079	0.016	3.087	3.8289	2.0074	0.4229	0.0478	0.5015	0.0003	-2.5639	3.7915	1.6927	0.018	0.5906	0.0236	4.5964	3.7034	2.1406	0.048	0.4714
BITYA_OGPRCC_V_1758	2723		15.44	0.421	477.427	505.032	1279.47	1.50978	1.1869	0.1514	0.0001	! 0.000	0.3306	0.21302	3.6375	893.411	0.0153	3.177	3.4089	1.87	0.47	0.0433	0.5364	0.0005	-1.3185	3.6426	1.6101	0.0172	0.6244	0.0235	4.9407	3.2648	2.0686	0.0436	0.483
BITYA_OGPRCC_V_1_1	2724		15.34	0.449	521.158	560.925	1320.19	1.38742	1.06036	0.1588	0	! 0.000	0.24672	0.18244	9.9238	934.408	0.0136	2.7279	3.7437	1.6348	0.343	0.0515	0.6128	0.0001	-1.741	3.8004	! 1.568	0.0169	! 0.638	0.0198	3.9729	3.6555	1.8865	0.0516	0.5309
BITYA_OGPRCC_V_1_2	2725		15.24	0.457	518.834	559.148	1295.59	1.391	1.05545	0.1603	0.0002	! 0.010	0.25475	0.18777	7.054	916.916	0.0202	12.9276	2.9732	1.6554	0.5329	0.0461	0.608	0.0006	0	3.6195	1.9254	0.0177	0.5213	0.0302	19.4944	2.7749	1.6874	0.0463	0.6015
BITYA_OGPRCC_V_2_1	2726		14.82	0.452	512.958	548.216	1296.14	1.3921	1.06884	0.1536	0.0004	! 0.000	0.25019	0.18476	-7.8417	929.762	0.012	2.9233	3.5478	1.6419	0.2996	0.0489	0.6084	0.0003	-1.3178	3.3449	! 2.634	0.0161	! 0.379	0.0174	4.2794	3.4049	1.7931	0.0491	0.5572
BITYA_OGPRCC_V_2_2	2727		15.69	0.46	540.153	618.594	1361.32	1.3816	1.02666	0.1689	0.0001	! 0.000	0.26491	0.18825	9.2405	957.777	0.0248	5.7643	3.529	2.1106	0.6388	0.0491	0.4761	0.0019	-0.4007	3.9712	2.0152	0.022	0.5075	0.0363	8.6624	3.207	2.191	0.0498	0.4552
BITYA_OGPRCC_V_1785	2728		15.14	0.46	541.246	579.51	1364.19	1.37765	1.05006	0.1589	0.0008	! 0.000	0.24296	0.17693	-7.295	927.985	0.0141	4.1855	3.5545	1.853	0.406	0.0459	0.5704	0.0007	-2.6686	3.971	1.6615	0.0196	0.6385	0.0206	6.1961	3.3766	1.9214	0.0464	0.543
BITYA_OGPRCC_V_1760	2729		15.54	0.431	512.685	584.976	1380.32	1.4591	1.11565	0.1657	0.0001	! 0.000	0.30401	0.21111	3.5009	946.297	0.0164	7.9945	2.9769	1.8424	0.4986	0.04	0.5406	0.0002	-2.2878	3.9505	1.7947	0.0162	0.5569	0.0244	11.9822	2.9005	1.9279	0.0401	0.5166
BITYA_OGPRCC_10ng_1799	2730		15.54	0.461	552.725	602.058	1386.88	1.44328	1.09534	0.1675	0.0006	! 0.000	0.30027	0.21211	28.9191	1000.69	0.0378	11.4778	3.3596	2.2547	0.9125	0.0575	0.4451	0.0056	-2.1378	3.7084	2.382	0.0257	0.4231	0.0546	17.462	2.8028	2.264	0.0592	0.4471
BITYA_OGPRCC_10ng_1779	2731		15.09	0.44	519.518	576.777	1354.9	1.44765	1.10513	0.1644	0.0006	! 0.010	0.29539	0.20347	11.017	913.09	0.0221	10.836	2.6982	1.5004	0.5246	0.053	0.6761	0.0004	-0.8128	3.6912	1.6778	0.0173	0.5963	0.0321	15.8752	2.5088	1.6064	0.0533	0.6344
BITYA_OGPRCC_10ng_1783	2732		15.92	0.459	546.439	594.406	1360.91	1.44208	1.08965	0.1669	0.0003	! 0.000	0.29901	0.21269	6.9173	984.151	0.0175	3.1656	3.9613	1.6005	0.4023	0.0594	0.6289	0.0005	-3.8739	3.9218	1.7238	0.0176	0.5801	0.0257	4.7028	3.7543	1.8074	0.0598	0.5585
BITYA_OGPRCC_10ng_1759	2733		15.5	0.423	495.603	539.06	1348.89	1.50363	1.17259	0.1568	0.0005	! 0.000	0.34025	0.22763	10.607	938.781	0.0263	16.0589	2.8665	1.9163	0.789	0.0431	0.523	0.0008	-1.2379	4.3508	1.4494	0.0215	0.689	0.0396	24.4672	2.7539	2.2292	0.0434	0.447
BITYA_OGPRCC_10ng_1777	2734		15.65	0.452	535.097	587.026	1382.1	1.39185	1.06468	0.1566	0.0003	! 0.000	0.25302	0.1818	21.2663	951.49	0.0312	11.8934	2.7131	1.4695	0.6547	0.06	0.6882	0.0012	-0.7928	3.4204	1.0026	0.0293	0.9999	0.046	17.7434	2.5754	1.6665	0.0604	0.6107
BITYA_OGPRCC_10ng_1793	2735		15.25	0.428	515.281	593.996	1400.68	1.3986	1.06932	0.1589	0.0007	! 0.000	0.25251	0.18422	6.3707	987.841	0.017	6.2575	3.6884	1.8911	0.4928	0.0464	0.5326	0.0003	-2.4392	4.0759	1.7344	0.0169	0.5753	0.0249	9.2115	3.5876	2.0269	0.0466	0.4957
BITYA_OGPRCC_10ng_1763	2736		15.22	0.451	533.457	586.889	1363.92	1.36956	1.04187	0.1584	0	! 0.000	0.23469	0.17062	5.6874	970.759	0.0213	6.3699	3.5207	1.9542	0.5421	0.0497	0.5132	0.0004	-0.9059	4.3525	1.7029	0.0172	0.5872	0.0311	9.3623	3.3781	2.0947	0.0499	0.4788
BITYA_OGPRCC_10ng_cage4	2737		14.54	0.434	508.175	575.137	1353.26	1.36895	1.045	0.1515	0.0002	! 0.000	0.23589	0.16871	-4.4252	962.56	0.0176	7.6509	2.8833	1.2401	0.4894	0.045	0.8133	0	-0.8982	3.9939	! 1.724	0.016	! 0.579	0.0257	11.1774	2.8707	1.6917	0.045	0.5967
BITYA_OGPRCC_100ng_1726	2738		15.14	0.461	559.558	628.16	1406.69	1.37469	1.02966	0.1662	0.0002	! 0.000	0.24921	0.18105	36.8452	983.741	0.0334	21.8267	3.3666	2.1751	0.9343	0.0468	0.4633	0.0025	0.8177	3.7921	1.7421	0.0209	0.5749	0.0487	32.5553	3.1328	2.4828	0.0475	0.4034
BITYA_OGPRCC_100ng_1797	2739		15.64	0.415	492.323	575.957	1398.77	1.42325	1.09701	0.158	0.0008	! 0.000	0.26978	0.19408	1.1777	931.265	0.0144	7.8925	3.4444	1.6528	0.3817	0.0464	0.6164	0.0002	-0.7721	3.8179	! 1.636	0.0163	! 0.612	0.0211	11.5972	3.3484	1.8054	0.0465	0.572
BITYA_OGPRCC_100ng_1796	2740		15.09	0.438	527.034	582.516	1396.44	1.42241	1.09252	0.1578	0.0001	! 0.000	0.268	0.18385	5.6874	957.367	0.0189	5.5858	3.2789	2.0191	0.5554	0.0429	0.4969	0.0013	-0.7714	3.6933	2.5447	0.0236	0.3938	0.0275	8.3266	3.1086	2.0231	0.0433	0.4917
BITYA_OGPRCC_100ng_1762	2741		15.24	0.44	508.175	556.005	1351.08	1.36882	1.05632	0.1514	0.0007	! 0.000	0.23042	0.17072	9.1038	926.892	0.022	13.5868	2.9003	1.7985	0.5769	0.0475	0.5626	0.0002	-1.6295	3.7252	1.923	0.017	0.5201	0.0333	20.5959	2.83	1.94	0.0476	0.524
BITYA_OGPRCC_100ng_1798	2742		15.3	0.481	586.616	611.761	1417.63	1.44885	1.09729	0.1708	0.0001	! 0.000	0.3049	0.20878	62.2634	930.855	0.0591	47.4318	2.893	3.0395	1.4842	0.0521	0.337	0.0042	-1.602	3.7007	2.6586	0.0212	0.3785	0.0874	71.9009	2.5983	3.5987	0.0528	0.2852
BITYA_OGPRCC_100ng_1792	2743		15.7	0.47	575.684	654.808	1424.32	1.39055	1.03104	0.1709	0.0001	! 0.000	0.26902	0.2009	15.8	1017.63	0.0223	8.176	3.2847	2.0666	0.6089	0.0465	0.4878	0.0009	-1.6839	3.9168	2.1746	0.0215	0.477	0.0326	12.0891	3.0984	2.0878	0.0469	0.4787
BITYA_OGPRCC_100ng_1755	2744		15.19	0.455	556.825	628.707	1423.09	1.39641	1.05097	0.1667	0.0006	! 0.000	0.26357	0.19012	25.2293	1038.13	0.0253	7.6152	3.6031	1.8188	0.5848	0.057	0.5584	0.0008	-1.7175	3.9234	1.6975	0.0196	0.5925	0.0373	11.3394	3.3871	2.0229	0.0574	0.5037
BITYA_OGPRCC_100ng_1795	2745		15.45	0.482	587.983	647.565	1416.26	1.42663	1.05809	0.1759	0.0002	! 0.000	0.29459	0.21316	10.0604	1018.32	0.0196	4.8513	3.3461	1.8754	0.5225	0.0479	0.5352	0.0013	-0.8386	3.8348	1.8262	0.0212	0.5437	0.0283	7.1488	3.0627	1.9131	0.0485	0.5271
BITYA_OVX_CBD_1	3113		15.72	0.5	499.272	544.811	1233.96	1.47387	1.09392	0.1838	0	0	0.33587	0.22977	30.8138	784.91	0.0442	15.5213	2.87	1.5525	0.9517	0.0616	0.6577	0.0024	-1.1697	3.4603	1.3547	0.0271	0.7569	0.064	22.1224	2.6219	1.6941	0.0622	0.5966
BITYA_OVX_CBD_2	3114		15.31	0.494	488.289	522.752	1233.96	1.43643	1.08159	0.1701	0	! 0.000	0.29443	0.20744	28.3522	782.449	0.0399	13.7538	3.202	1.9996	0.932	0.0591	0.4996	0.0019	-2.3929	3.6293	1.8216	0.0238	0.5343	0.0585	20.4807	2.9777	2.0902	0.0597	0.4788
BITYA_OVX_CBD_3	3115		15.45	0.466	463.011	492.645	1237.94	1.48106	1.14078	0.1599	0	! 0.000	0.31871	0.21556	17.3698	793.242	0.0363	10.7337	3.2941	1.9587	0.8312	0.0604	0.5106	0.0036	-2.1037	3.4414	1.983	0.0269	0.5009	0.0529	16.1755	2.9138	2.0458	0.0615	0.4912
BITYA_OVX_CBD_4	3116		15.67	0.464	462.064	525.213	1260.75	1.45613	1.10517	0.1669	0	! 0.000	0.30876	0.21128	14.1508	752.152	0.0226	13.5073	3.3901	2.1597	0.7251	0.0411	0.4631	0.0031	-1.5249	3.4843	1.9231	0.0254	0.5126	0.0322	20.102	3.1953	2.2686	0.0419	0.4383
BITYA_OVX_CBD_5	3117		15.69	0.492	496.053	535.344	1246.65	1.40919	1.0559	0.1668	0	0	0.27445	0.19866	27.9735	780.745	0.0392	9.9173	2.1754	1.605	0.6422	0.0757	0.6333	0.0001	-0.7832	4.4303	1.2279	0.0261	0.801	0.0584	14.7779	2.1319	1.7738	0.0758	0.5775
BITYA_OVX_CBD_6	3118		15.68	0.498	489.615	574.256	1281.01	1.3787	1.01424	0.175	0	! 0.000	0.2585	0.18984	18.0325	788.224	0.0232	6.7878	3.6517	1.9438	0.6452	0.0521	0.4925	0.0019	-0.8846	3.4774	1.7345	0.0286	0.5844	0.0329	9.8833	3.5651	2.0086	0.0528	0.4776
BITYA_OVX_CBD_7	3119		15.6	0.478	474.562	534.965	1279.5	1.4777	1.12001	0.1701	0	! 0.000	0.3263	0.22436	20.0207	777.336	0.0289	9.4769	3.4397	1.904	0.6956	0.0538	0.5249	0.0011	-1.5657	3.8738	1.7079	0.0263	0.5839	0.0424	14.0852	3.2957	2.02	0.0542	0.4934
BITYA_OVX_6WK_1	3076		15.32	0.402	467.597	527.119	1331.15	1.40981	1.11125	0.1431	0	! 0.000	0.24569	0.17591	34.2467	922.293	0.0278	24.332	3.1457	1.3889	0.7494	0.0486	0.729	0	0	4.3222	! 0.000	0.01	! 0.000	0.0431	37.6929	3.1442	2.1803	0.0486	0.4628
BITYA_OVX_6WK_2	3077		15.23	0.414	476.901	540.666	1336.35	1.3977	1.08889	0.1508	0.0003	! 0.000	0.24643	0.17526	20.0161	880.285	0.019	13.5832	2.9873	1.8601	0.5788	0.0397	0.5415	0.0003	-1.5929	4.4845	1.5349	0.0177	0.6589	0.0286	20.5099	2.9281	2.2008	0.0398	0.4555
BITYA_OVX_6WK_3	3078		15.28	0.404	466.913	538.887	1335.26	1.39544	1.09176	0.1463	0.0002	! 0.000	0.24052	0.17896	24.6684	930.366	0.0242	18.9456	3.0992	1.9322	0.7081	0.0435	0.5188	0.0003	-1.5109	3.8691	1.4833	0.0177	0.675	0.0364	28.5589	3.0418	2.2321	0.0436	0.4488
BITYA_OVX_6WK_4	3079		14.99	0.425	492.227	537.929	1342.1	1.39909	1.09783	0.1449	0.0003	! 0.000	0.24548	0.17666	41.0884	967.448	0.0265	14.7867	3.5413	2.4257	0.8951	0.04	0.4127	0.0044	-0.7724	3.8058	1.9533	0.024	0.5105	0.0376	22.2641	3.3309	2.7419	0.041	0.3635
BITYA_OVX_6WK_5	3080		15.4	0.416	477.038	535.877	1318.29	1.39096	1.08628	0.1469	0.0013	! 0.000	0.23596	0.17606	13.3113	908.61	0.0162	10.0823	3.5181	1.8102	0.493	0.0406	0.5546	0.0004	-0.8149	4.1254	1.3187	0.0172	0.7605	0.0239	15.0471	3.3937	2.2432	0.0408	0.4473
BITYA_OVX_6WK_6	3081		14.55	0.418	482.238	505.5	1325.81	1.40833	1.12281	0.1374	0.0003	! 0.000	0.23971	0.1728	36.0256	928.587	0.0283	18.5912	3.6483	2.7491	0.9284	0.0383	0.3639	0.0036	0.6986	3.4715	2.2705	0.0206	0.4415	0.0414	28.5084	3.4564	3.0837	0.0392	0.3224
BITYA_OVX_6WK_7	3082		15.35	0.423	493.595	563.38	1350.58	1.41734	1.09707	0.1542	0.0007	! 0.023	0.25975	0.18594	25.2158	916.956	0.0181	10.3261	3.575	1.4372	0.4937	0.0474	0.6993	0.0001	-1.4934	3.762	1.3142	0.0192	0.7608	0.0274	15.6802	3.5444	2.1016	0.0474	0.4777
BITYA_SHAM_6WK_1	3083		15.1	0.491	581.442	608.398	1355.64	1.41335	1.06595	0.1665	0.0008	! 0.000	0.27777	0.20391	78.9911	983.184	0.0533	49.2363	3.3998	2.9671	1.585	0.0467	0.3384	0.0115	4.2542	3.3792	2.3995	0.0241	0.4145	0.075	72.5802	3.1368	3.3738	0.0486	0.2972
BITYA_SHAM_6WK_2	3084		14.91	0.469	547.781	548.602	1338.95	1.40845	1.09847	0.1492	0.0001	! 0.000	0.25748	0.19061	83.6435	974.974	0.0566	41.8043	3.2835	2.9808	1.5507	0.0494	0.3381	0.0084	3.669	3.6166	2.3417	0.0256	0.431	0.0817	63.6475	2.9118	3.4694	0.0507	0.2872
BITYA_SHAM_6WK_3	3085		14.57	0.418	479.091	503.173	1318.84	1.39981	1.11801	0.1357	0.0006	! 0.010	0.23045	0.16487	58.7398	926.808	0.039	29.7655	3.4423	2.887	1.2642	0.0408	0.3463	0.0072	2.095	3.4787	2.4583	0.0214	0.407	0.0552	44.8921	3.1778	3.1397	0.0422	0.317
BITYA_SHAM_6WK_4	3086		15.5	0.487	555.854	585.684	1366.18	1.42749	1.09333	0.1615	0.0009	! 0.000	0.27689	0.20137	72.0126	937.071	0.0485	37.1822	3.3327	2.8779	1.4204	0.0462	0.3474	0.0098	0	3.4508	2.5163	0.0233	0.3988	0.0689	56.4213	2.9986	3.1488	0.0479	0.3139
BITYA_SHAM_12WK_1	3120		15.54	0.545	574.824	636.553	1328.45	1.45292	1.03931	0.2056	0	0	0.33069	0.23018	53.2521	898.048	0.0504	31.5134	3.478	2.7945	1.3473	0.061	0.351	0.0134	9.6275	3.1822	2.8663	0.0339	0.338	0.068	39.9091	3.3564	2.8273	0.0636	0.3486
BITYA_SHAM_12WK_2	3121		15.62	0.536	547.178	601.238	1316.42	1.42508	1.04237	0.1866	0	! 0.000	0.29842	0.21545	48.6129	812.934	0.0464	40.4243	3.1704	2.5884	1.4147	0.0479	0.3813	0.0174	16.2751	3.0991	2.1437	0.0342	0.4814	0.0606	50.2404	3.0942	2.9421	0.05	0.3313
BITYA_SHAM_12WK_3	3122		15.47	0.535	552.291	610.611	1312.45	1.44457	1.04945	0.1904	0	! 0.000	0.32251	0.22779	45.7726	822.402	0.0442	40.0047	3.0614	2.6891	1.4049	0.0477	0.3627	0.0198	16.9774	3.0915	2.5196	0.0344	0.3907	0.0557	46.1916	2.9862	2.7942	0.05	0.3503
BITYA_SHAM_12WK_4	3123		15.7	0.542	556.74	609.38	1299.57	1.48145	1.07127	0.1971	0	! 0.000	0.35856	0.24897	46.0567	798.544	0.043	37.036	2.9968	2.4555	1.3447	0.0472	0.4065	0.0194	13.0778	3.02	2.1408	0.0354	0.4712	0.0545	46.3564	2.9215	2.6931	0.0493	0.3694
BITYA_SHAM_12WK_5	3124		15.28	0.541	552.859	617.333	1302.22	1.50967	1.08678	0.2063	0	0	0.38615	0.26087	59.122	791.916	0.0644	56.4132	2.9509	2.9676	1.7967	0.0562	0.3243	0.0309	33.013	3.028	2.9073	0.0387	0.334	0.0808	63.9889	2.8405	3.0564	0.0594	0.3132
BITYA_SHAM_12WK_6	3125		15.07	0.56	591.865	659.086	1333.28	1.39703	0.984946	0.1963	0	0	0.29242	0.22101	70.8618	817.952	0.0731	65.8554	2.8059	3.1014	2.0917	0.0506	0.3093	0.0459	35.5242	2.848	2.8236	0.0417	0.3366	0.0859	73.1833	2.7655	3.2713	0.0529	0.2946
BITYA_SHAM_12WK_7	3126		15.36	0.527	546.231	608.434	1325.8	1.42275	1.03893	0.1876	0	0	0.2995	0.21868	50.3171	797.218	0.0437	41.2566	2.8377	2.3917	1.3766	0.0455	0.3925	0.0199	18.82	2.8847	2.0397	0.0368	0.427	0.0551	49.2219	2.8016	2.6668	0.047	0.3633
BITYA_SHAM_12WK_8	3127		15.85	0.572	595.842	614.493	1272.68	1.49805	1.06937	0.2053	0.0001	! 0.000	0.38532	0.27085	66.6014	852.982	0.0722	53.9096	3.0495	2.7636	1.8667	0.0592	0.3506	0.0256	25.2679	3.0254	2.2599	0.0382	0.4399	0.0952	65.1931	2.887	3.0801	0.0619	0.309
BITYA_SHAM_12WK_9	3128		15.32	0.547	585.143	605.688	1307.52	1.47154	1.06821	0.1912	0	0	0.3511	0.24543	25.0385	868.699	0.0406	17.7738	3.3846	2.1127	1.0171	0.0595	0.4559	0.0068	4.9274	3.4395	2.0191	0.0311	0.4519	0.058	23.6056	3.1282	2.2707	0.0612	0.44
BITYA_SHAM_12WK_10	3129		15.92	0.563	616.292	615.818	1313.11	1.51726	1.09552	0.207	0	0	0.39197	0.26883	48.7076	803.088	0.0484	46.7508	3.08	2.8886	1.5114	0.0482	0.3408	0.0227	20.7155	3.0228	2.649	0.0372	0.3686	0.0622	56.4583	3.0476	3.038	0.0504	0.3236
BITYA_12wOVX_CB2KO_1OGP1	3682
BITYA_12wOVX_CB2KO_1OGP2	3683		16.31	0.448	527.667	569.948	1389.58	1.54123	1.18277	0.1722	0	0	0.37921	0.25498	13.9955	941.45	0.0229	9.5783	2.9227	1.3562	0.592	0.0465	0.7458	0	-0.3105	3.8944	! 0.000	0.01	! 0.000	0.0353	14.7476	2.9196	1.734	0.0465	0.582
BITYA_12wOVX_CB2KO_1OGP3	3684		16.24	0.505	611.682	585	1387.66	1.64374	1.25059	0.1886	0	0.01	0.51068	0.32416	76.8018	1031.76	0.0696	35.7504	2.9572	2.4572	1.56	0.0631	0.4074	0.0132	4.6436	3.9729	2.1091	0.0417	0.4748	0.1039	55.1745	2.532	2.7752	0.0647	0.3592
BITYA_12wOVX_CB2KO_1OGP4	3685		16.27	0.433	507.826	509.741	1358.24	1.6551	1.31601	0.161	0.0001	! 0.000	0.45925	0.28172	26.0368	958.417	0.0354	21.6021	2.4777	1.7687	0.9018	0.049	0.5768	0.0009	0.5093	5.1097	1.1325	0.0321	0.8923	0.0555	33.9281	2.4194	2.2665	0.0492	0.4442
BITYA_12wOVX_CB2KO_1OGP6	3686		15.59	0.42	486.48	512.889	1361.53	1.49408	1.18349	0.1493	0.0005	! 0.000	0.30806	0.21033	33.9731	948.702	0.0436	23.482	3.0599	2.8379	1.3001	0.0427	0.3512	0.0104	0.6224	3.5835	2.7658	0.0272	0.3617	0.062	36.2069	2.6367	2.9166	0.0441	0.3416
BITYA_12wOVX_CB2KO_2OGP1	3687		15.97	0.459	528.487	530.677	1358.93	1.61002	1.24608	0.1738	0.0003	! 0.010	0.44274	0.27539	28.3629	949.386	0.0393	19.6281	2.5933	1.8835	0.945	0.0533	0.5341	0.0003	-1.7364	4.127	1.6948	0.0181	0.5907	0.0605	30.2627	2.5355	2.2248	0.0534	0.4478
BITYA_12wOVX_CB2KO_2OGP3	3688		16.13	0.49	582.673	573.232	1387.11	1.66027	1.27807	0.1817	0.0003	! 0.000	0.51553	0.31735	65.3078	1008.5	0.0657	49.1655	2.972	2.718	1.7581	0.0519	0.3631	0.0227	13.8564	3.5613	2.3712	0.042	0.4198	0.0919	68.182	2.6387	3.0083	0.0533	0.3247
BITYA_12wOVX_CB2KO_2OGP5	3689		15.89	0.478	569.948	585.41	1378.77	1.58602	1.21221	0.1798	0.0008	! 0.000	0.42728	0.27371	36.0256	1001.38	0.0369	14.0656	2.5984	1.4262	0.8548	0.0549	0.741	0.0005	-0.5884	3.5084	0.9923	0.0207	1.0976	0.0578	22.1491	2.5197	1.8696	0.0551	0.542
BITYA_12wOVX_CB2KO_2OGP6	3690		15.81	0.446	534.235	540.529	1396.69	1.63337	1.28342	0.1692	0	0	0.44288	0.26854	37.8044	976.479	0.042	24.5363	2.4794	1.8698	1.0865	0.0483	0.5487	0.0021	-0.5613	3.8342	1.4186	0.0268	0.7117	0.0647	38.1831	2.297	2.3259	0.0487	0.4388
BITYA_12wOVX_CB2KO_2OGP7	3691		15.8	0.473	565.706	619.345	1383.97	1.51921	1.13591	0.185	0.0005	! 0.000	0.37271	0.25202	45.1934	977.984	0.045	26.2286	3.0819	2.7154	1.2298	0.0475	0.3666	0.0044	-0.6544	3.7501	2.5652	0.0253	0.3888	0.0682	41.1561	2.7994	2.805	0.0483	0.3542
BITYA_12wOVX_CB2KO_3c1	3692		16.38	0.501	587.736	590.61	1353.86	1.64153	1.24107	0.1899	0.0003	! 0.000	0.51324	0.32389	48.3405	976.342	0.0535	23.6285	2.7827	2.0708	1.2356	0.0581	0.4882	0.0039	-1.042	4.8094	1.3389	0.0407	0.7688	0.0836	37.3519	2.5598	2.6831	0.0585	0.3703
BITYA_12wOVX_CB2KO_3c2	3693		15.92	0.461	541.487	573.095	1374.66	1.59582	1.22522	0.1802	0	! 0.000	0.42692	0.27589	21.7949	962.932	0.0287	11.9629	2.7084	1.1703	0.6797	0.0525	0.8722	0.0023	-0.6155	3.0635	0.6992	0.0527	1.3376	0.0425	18.2368	2.6952	1.7601	0.0524	0.572
BITYA_12wOVX_CB2KO_3c3	3694		16.03	0.485	573.779	597.178	1376.3	1.57742	1.19544	0.1848	0.0001	! 0.000	0.41934	0.27357	37.257	971.142	0.0401	22.2006	2.2503	1.4303	0.9482	0.0534	0.711	0.0004	0	7.7111	0.8408	0.0457	1.1765	0.0615	34.1736	2.2324	2.0905	0.0534	0.4826
BITYA_12wOVX_CB2KO_3c4	3695		16.03	0.477	568.58	600.599	1386.16	1.57163	1.19204	0.1843	0.0003	! 0.010	0.41229	0.26559	28.2261	959.375	0.0345	12.3749	2.5012	1.6142	0.8514	0.0489	0.6255	0.0009	-1.261	6.6586	1.384	0.0343	0.7216	0.0535	19.3396	2.4262	1.9898	0.049	0.5058
BITYA_12wOVX_CB2KO_3c5	3696		15.87	0.464	537.792	571.453	1364.95	1.52889	1.17327	0.1713	0.0006	! 0.000	0.36718	0.24302	26.5841	943.502	0.0379	14.0574	2.3315	1.7348	0.8905	0.0517	0.5724	0.0018	-1.1879	4.5734	1.3065	0.0336	0.75	0.0577	21.735	2.2185	2.1007	0.052	0.4754
BITYA_12wOVX_CB2KO_4c1	3697		15.95	0.512	595.809	607.987	1359.47	1.62808	1.21924	0.1966	0.0006	! 0.010	0.49409	0.3117	54.3612	962.522	0.0522	41.8665	3.081	2.3161	1.4504	0.0505	0.4325	0.0114	8.0592	3.1983	1.7126	0.0308	0.5842	0.0757	61.1722	2.908	2.9758	0.0522	0.3318
BITYA_12wOVX_CB2KO_4c2	3698		15.42	0.505	594.168	624.955	1382.6	1.50141	1.1193	0.183	0.0002	! 0.010	0.36252	0.24591	67.9077	953.491	0.0693	40.1057	2.1272	1.8796	1.6059	0.0523	0.5408	0.0068	0	4.6151	1.1521	0.0484	0.881	0.1027	61.606	1.9863	2.7405	0.0524	0.3602
BITYA_12wOVX_CB2KO_4c3	3699		16.1	0.449	531.908	545.044	1357.42	1.6623	1.29577	0.1757	0.0001	! 0.000	0.49506	0.29925	35.0677	969.09	0.0352	17.5158	2.6906	1.8526	0.8617	0.0506	0.5417	0.0006	-1.0865	3.963	1.3452	0.0188	0.7429	0.0547	27.3797	2.5407	2.2343	0.0508	0.4451
BITYA_12wOVX_CB2KO_4c4	3700		15.82	0.513	613.05	606.209	1379.32	1.64702	1.2437	0.194	0.0001	! 0.010	0.51158	0.31607	65.7183	1005.76	0.0548	28.2724	3.5823	2.5995	1.364	0.0551	0.3827	0.0114	6.3988	3.3416	2.3861	0.0278	0.4167	0.0815	43.0764	3.1501	2.7717	0.0575	0.3591
BITYA_12wOVX_CB2KO_4c5	3701		15.88	0.46	523.014	537.245	1329.37	1.64933	1.2807	0.1777	0.0002	! 0.000	0.489	0.29889	14.2691	969.911	0.0299	10.4518	2.6547	1.2863	0.6556	0.0562	0.7816	0.0011	-0.5862	5.9023	0.9615	0.0417	1.0418	0.0454	16.0691	2.5511	1.5248	0.0564	0.6559
BITYA_12wSHAM_CB2KO_1c1	3702		16.43	0.537	630.428	592.525	1351.67	1.72715	1.30278	0.2036	0.0002	! 0.000	0.62285	0.37575	83.2329	991.804	0.0787	54.6336	3.1565	3.166	1.9781	0.0561	0.3108	0.0302	25.1171	3.3818	2.8792	0.041	0.3423	0.1093	68.2767	2.8349	3.3933	0.0585	0.2886
BITYA_12wSHAM_CB2KO_1c2	3703		15.51	0.511	588.694	560.78	1336.76	1.62207	1.24569	0.1828	0.0001	! 0.010	0.45788	0.29471	99.5161	962.932	0.0904	89.9479	2.6474	3.1315	2.4526	0.0487	0.3158	0.0286	28.6718	3.0476	2.5164	0.0318	0.3937	0.1267	119.467	2.3593	3.6723	0.051	0.265
BITYA_12wSHAM_CB2KO_1c3	3704		16.01	0.528	631.933	642.606	1381.78	1.64912	1.21722	0.2051	0.0002	! 0.010	0.55267	0.34969	105.263	1025.05	0.0922	63.3599	2.768	3.2249	2.2885	0.0549	0.3028	0.0304	27.8186	3.1947	2.6972	0.0377	0.3645	0.1301	80.3405	2.4187	3.6243	0.0574	0.2653
BITYA_12wSHAM_CB2KO_1c4	3705		15.88	0.545	655.058	644.933	1387.53	1.62493	1.19965	0.2034	0.0008	0.0373	0.51203	0.32993	86.2433	1005.62	0.0757	51.9024	3.0279	2.6861	1.8567	0.0564	0.3717	0.0158	8.505	3.3441	2.109	0.0341	0.4786	0.1137	76.2519	2.7039	3.2774	0.0584	0.2955
BITYA_12wSHAM_CB2KO_1c5	3706		16.06	0.504	587.736	588.831	1349.9	1.6644	1.26147	0.1938	0	0	0.53079	0.33308	77.486	999.056	0.0698	52.7068	3.2458	2.9889	1.8373	0.0531	0.3292	0.0176	6.1501	3.5073	2.5742	0.0322	0.3793	0.101	76.7633	2.8323	3.3489	0.0553	0.2932
BITYA_12wSHAM_CB2KO_2c1	3707		15.62	0.531	615.65	622.355	1341.41	1.62623	1.19893	0.2019	0.0006	! 0.019	0.52491	0.34399	71.6021	983.594	0.0676	33.0442	3.0116	2.8117	1.6758	0.0552	0.3555	0.0163	1.4271	4.2088	2.3435	0.0512	0.4292	0.0992	52.6668	2.6054	3.2131	0.0555	0.3066
BITYA_12wSHAM_CB2KO_2c2	3708		15.87	0.519	627.418	635.491	1378.49	1.70549	1.2618	0.212	0	! 0.000	0.62769	0.37429	64.6237	1008.36	0.056	36.6626	3.3788	2.5224	1.4287	0.0556	0.3974	0.0134	12.9331	3.3155	2.2017	0.0307	0.4501	0.0827	50.2441	3.0465	2.8302	0.0582	0.3571
BITYA_12wSHAM_CB2KO_2c3	3709		15.93	0.526	634.26	636.312	1386.43	1.61264	1.1951	0.1994	0.0002	! 0.010	0.48925	0.31477	76.8018	1006.58	0.0684	53.5357	3.0801	3.0117	1.8084	0.0518	0.3306	0.0248	22.3767	3.3773	2.6835	0.0404	0.3692	0.0933	65.8635	2.7727	3.2507	0.0535	0.3066
BITYA_12wSHAM_CB2KO_2c4	3710		15.84	0.505	592.389	587.052	1347.3	1.60854	1.2164	0.1868	0.0011	! 0.000	0.4629	0.29442	58.3293	1000.29	0.0531	38.1611	3.4029	2.7529	1.4818	0.0502	0.3607	0.0121	7.446	3.2471	2.2239	0.026	0.4463	0.079	54.8887	3.1017	3.2609	0.0525	0.301
BITYA_12wSHAM_CB2KO_2c5	3711		15.67	0.529	629.47	626.597	1363.44	1.62256	1.20218	0.1995	0	0	0.50037	0.32499	74.0652	1013.29	0.0682	49.294	3.2402	2.8425	1.7745	0.0558	0.3496	0.0232	21.639	3.2259	2.3411	0.0344	0.4319	0.0955	61.32	2.9984	3.2592	0.059	0.2994
Bitya_CBD2_12w_sh1	3781		15.1	0.458	526.982	586.642	1351.54	1.39631	1.05881	0.1622	0.0002	! 0.000	0.26255	0.19333	34.1099	923.935	0.0336	25.1893	3.3028	2.6683	1.0852	0.04	0.3724	0.008	1.5546	3.3829	2.226	0.025	0.4436	0.0468	37.7282	3.1101	2.9377	0.0413	0.3392
Bitya_CBD2_12w_sh2	3782		14.83	0.455	532.456	574.874	1369.87	1.38317	1.06123	0.1552	0.0001	! 0.000	0.24304	0.181	41.7726	923.661	0.0395	30.2586	3.2688	2.7014	1.2521	0.0416	0.3717	0.0088	0.4235	3.5034	2.3108	0.0259	0.4321	0.0539	43.9904	3.05	3.0691	0.0428	0.3263
Bitya_CBD2_12w_sh3	3783		14.82	0.476	565.706	623.723	1391.77	1.37739	1.03257	0.1669	0.001	! 0.000	0.24888	0.17954	29.5944	958.28	0.0271	13.5901	3.6746	2.53	0.8503	0.0418	0.3972	0.004	-1.7413	3.5579	2.1379	0.0237	0.4744	0.0385	20.2942	3.5202	2.7678	0.0428	0.3619
Bitya_CBD2_12w_sh4	3784		15.16	0.468	551.202	577.884	1367.27	1.386	1.06195	0.156	0.0008	! 0.000	0.24555	0.1859	43.9619	928.724	0.0394	39.3355	3.2022	2.5456	1.1937	0.042	0.3934	0.0061	0	3.3838	2.435	0.022	0.4121	0.0581	60.0925	2.9157	2.6288	0.0432	0.3799
Bitya_CBD2_12w_sh5	3785		14.95	0.459	540.118	575.421	1335.8	1.44466	1.09914	0.1677	0.0009	! 0.010	0.2958	0.21844	41.6357	927.356	0.038	29.0796	3.3929	2.6222	1.1619	0.0408	0.3844	0.0062	0.3503	3.4248	2.3898	0.0223	0.4231	0.0555	45.0698	3.1224	2.9649	0.0421	0.3381
Bitya_CBD2_12w_sh6	3762
Bitya_CBD2_12w_sh7	3763		15.04	0.466	544.634	603.883	1358.11	1.38163	1.03862	0.1674	0.0002	! 0.000	0.25321	0.18363	22.4791	882.611	0.0178	8.2821	3.4525	2.4807	0.6778	0.0322	0.4089	0.0062	0	3.49	2.4314	0.0251	0.4131	0.0234	12.2585	3.3634	2.5127	0.0331	0.3966
Bitya_CBD2_12w_sh8	3764		15.25	0.482	564.338	602.514	1342.1	1.41202	1.05971	0.1664	0.0003	! 0.000	0.28429	0.20395	54.9085	925.303	0.0444	45.6047	3.2575	2.6539	1.3398	0.0443	0.3677	0.0081	2.9414	3.3766	2.1704	0.0223	0.426	0.0657	72.4184	2.9493	3.0436	0.046	0.3312
Bitya_CBD2_12w_CBD1	3765		15.29	0.469	555.717	601.283	1376.85	1.41431	1.07076	0.1669	0.0006	! 0.000	0.27088	0.19122	9.48	956.227	0.0173	8.3044	3.3478	1.7844	0.4852	0.0426	0.5582	0.0002	-2.3373	4.0665	1.465	0.0184	0.6857	0.0262	12.6562	3.2898	2.0006	0.0427	0.5024
Bitya_CBD2_12w_CBD2	3766		15.73	0.45	532.592	591.841	1383.69	1.42849	1.08841	0.1653	0.0002	! 0.000	0.28132	0.19549	13.8586	983.594	0.0217	13.1996	3.236	1.8555	0.5169	0.0499	0.5456	0.0004	-1.9734	3.8209	1.6594	0.0175	0.6048	0.0323	19.7828	3.0174	1.9948	0.0501	0.509
Bitya_CBD2_12w_CBD3	3767		15.66	0.458	546.276	581.989	1382.05	1.39807	1.07348	0.1558	0.0001	! 0.000	0.2553	0.18071	28.3629	975.658	0.0302	20.6252	2.7793	1.6461	0.6975	0.0515	0.6128	0.0003	-1.5284	4.2973	1.2488	0.0194	0.794	0.0459	31.4319	2.6799	2.1085	0.0516	0.4807
Bitya_CBD2_12w_CBD4	3768		15.25	0.437	521.646	568.306	1392.31	1.4823	1.14926	0.1598	0.0001	! 0.000	0.31324	0.21235	15.2269	943.092	0.0196	13.5479	3.205	2.0329	0.6004	0.0392	0.4942	0.0006	-2.2119	3.5395	2.0183	0.0165	0.4954	0.0293	20.4874	3.0392	2.0786	0.0394	0.4838
Bitya_CBD2_12w_CBD5	3769		15.19	0.446	517.541	589.789	1362.35	1.37038	1.0412	0.1582	0.0006	! 0.000	0.2373	0.17762	7.1538	899.305	0.0139	7.2904	3.661	1.7201	0.3896	0.0413	0.5898	0.0006	-1.6506	4.6292	1.4367	0.0204	0.7105	0.0205	10.9358	3.4789	1.8821	0.0416	0.5365
Bitya_CBD2_12w_CBD6	3770		15.31	0.451	537.519	560.917	1376.85	1.43679	1.11318	0.1542	0.0007	! 0.000	0.2793	0.19704	14.6796	974.153	0.0224	12.3478	2.9765	1.7892	0.5752	0.0469	0.5603	0.0003	-1.5776	3.7519	1.4171	0.0183	0.7053	0.0336	18.6142	2.8888	2.0133	0.047	0.4976
Bitya_CBD2_12w_CBD7	3771		15.38	0.454	540.118	593.21	1401.07	1.41409	1.08057	0.1606	0.0001	! 0.000	0.27068	0.19144	18.3741	960.332	0.0239	14.5016	2.8336	1.4	0.6264	0.0466	0.7184	0.0001	-0.8306	3.5012	0.843	0.0177	1.1846	0.0357	21.7271	2.7922	1.9388	0.0467	0.5165
Bitya_CBD2_12w_CBD8	3772		15.27	0.46	560.643	630.428	1411.2	1.35427	1.01619	0.1618	0.0006	! 0.000	0.23303	0.17192	25.4894	984.826	0.0272	15.3546	2.848	1.6872	0.6681	0.0495	0.5844	0.0006	-1.7157	3.5524	1.2182	0.019	0.8214	0.0408	23.1844	2.685	1.9461	0.0498	0.505
Bitya_CBD2_12w_OVX_Veh1	3773		15.45	0.455	529.719	587.463	1357.29	1.37398	1.04127	0.1598	0	0	0.24064	0.17584	6.196	945.418	0.0178	8.949	3.0408	1.5467	0.3928	0.0562	0.6525	0	-0.8449	4.5099	1.7948	0.01	0.5641	0.0262	13.179	2.9987	1.6371	0.0562	0.6173
Bitya_CBD2_12w_OVX_Veh2	3774		14.93	0.443	516.857	579.389	1378.63	1.37993	1.05849	0.1539	0.0004	! 0.000	0.2423	0.17326	3.4593	922.156	0.0138	8.4146	3.1559	2.0982	0.3871	0.0423	0.4777	0	-0.8375	4.2682	! 0.000	0.01	! 0.000	0.0207	12.6519	3.1435	2.0982	0.0423	0.4777
Bitya_CBD2_12w_OVX_Veh3	3775		15.6	0.479	568.169	581.168	1374.53	1.48176	1.13474	0.1715	0.0005	! 0.000	0.31797	0.21028	26.8578	977.163	0.0283	17.8364	3.49	1.9169	0.7554	0.0487	0.5292	0.0016	-0.7145	3.6183	1.6924	0.0193	0.5956	0.0425	27.3533	3.2597	2.224	0.0493	0.4543
Bitya_CBD2_12w_OVX_Veh4	3776		14.71	0.444	530.54	575.284	1384.24	1.38171	1.06596	0.1518	0.0003	! 0.000	0.23984	0.17319	5.9223	968.816	0.0147	7.5101	3.467	1.9862	0.4514	0.0391	0.4916	0.0009	-2.4689	3.6575	2.1827	0.0185	0.4484	0.0216	11.2401	3.2918	1.9727	0.0396	0.4935
Bitya_CBD2_12w_OVX_Veh5	3777		15.22	0.44	509.605	583.768	1361.94	1.38446	1.05501	0.1586	0.0007	! 0.000	0.24814	0.18225	15.9111	942.681	0.0219	11.7777	3.2154	2.2863	0.6276	0.0414	0.4343	0.0003	-3.3305	4.1206	! 2.671	0.0178	! 0.371	0.0325	17.5514	3.1425	2.3453	0.0415	0.4346
Bitya_CBD2_12w_OVX_Veh6	3778		15.29	0.458	539.434	601.42	1386.16	1.39366	1.05452	0.1628	0.0005	! 0.000	0.2544	0.18399	9.6168	993.583	0.0224	7.7891	2.9757	1.7422	0.4481	0.0637	0.5755	0.0004	-3.3143	3.8764	1.7334	0.0193	0.5771	0.0334	11.6736	2.7604	1.8119	0.064	0.5533
Bitya_CBD2_12w_OVX_Veh7	3779		15.36	0.455	542.992	573.779	1386.43	1.45634	1.1222	0.1566	0.0001	! 0.000	0.29563	0.20513	24.2579	1004.8	0.0262	7.6454	3.414	2.0432	0.6425	0.0525	0.4961	0.0016	-0.734	3.5271	1.8439	0.02	0.554	0.0395	11.7643	3.1269	2.1941	0.0532	0.4592
Bitya_CBD2_12w_OVX_Veh8	3780		15.22	0.457	546.55	604.704	1402.17	1.39514	1.05976	0.1621	0.0006	! 0.000	0.25689	0.18607	16.5953	988.11	0.0209	12.3302	3.2135	1.7359	0.5248	0.0509	0.577	0.0005	-1.6157	3.7657	1.3408	0.018	0.7456	0.0311	18.5543	3.0154	2.0097	0.0512	0.4971

## Sheet: Sheet11
SPECIMEN	BV/TV
[name]	[%]
PROJECT
BITYA_OGPRCC_V_1784	0.016	0.01655		BITYA_OGPRCC_V_1784	0.016	0.01655
BITYA_OGPRCC_V_1758	0.0153			BITYA_OGPRCC_V_1758	0.0153
BITYA_OGPRCC_V_1_1	0.0136			BITYA_OGPRCC_V_1_1	0.0136
BITYA_OGPRCC_V_1_2	0.0202			BITYA_OGPRCC_V_1_2	0.0202
BITYA_OGPRCC_V_2_1	0.012			BITYA_OGPRCC_V_2_1	0.012
BITYA_OGPRCC_V_2_2	0.0248			BITYA_OGPRCC_V_2_2	0.0248
BITYA_OGPRCC_V_1785	0.0141			BITYA_OGPRCC_V_1785	0.0141
BITYA_OGPRCC_V_1760	0.0164			BITYA_OGPRCC_V_1760	0.0164
BITYA_OGPRCC_10ng_1799	0.0378	0.02385		BITYA_OGPRCC_10ng_1799	0.0378	0.02385
BITYA_OGPRCC_10ng_1779	0.0221			BITYA_OGPRCC_10ng_1779	0.0221
BITYA_OGPRCC_10ng_1783	0.0175			BITYA_OGPRCC_10ng_1783	0.0175
BITYA_OGPRCC_10ng_1759	0.0263			BITYA_OGPRCC_10ng_1759	0.0263
BITYA_OGPRCC_10ng_1777	0.0312			BITYA_OGPRCC_10ng_1777	0.0312
BITYA_OGPRCC_10ng_1793	0.017			BITYA_OGPRCC_10ng_1793	0.017
BITYA_OGPRCC_10ng_1763	0.0213			BITYA_OGPRCC_10ng_1763	0.0213
BITYA_OGPRCC_10ng_cage4	0.0176			BITYA_OGPRCC_10ng_cage4	0.0176
BITYA_OGPRCC_100ng_1726	0.0334	0.026875		BITYA_OGPRCC_100ng_1726	0.0334	0.026875
BITYA_OGPRCC_100ng_1797	0.0144			BITYA_OGPRCC_100ng_1797	0.0144
BITYA_OGPRCC_100ng_1796	0.0189			BITYA_OGPRCC_100ng_1796	0.0189
BITYA_OGPRCC_100ng_1762	0.022			BITYA_OGPRCC_100ng_1762	0.022
BITYA_OGPRCC_100ng_1798	0.0591			BITYA_OGPRCC_100ng_1798	0.0591
BITYA_OGPRCC_100ng_1792	0.0223			BITYA_OGPRCC_100ng_1792	0.0223
BITYA_OGPRCC_100ng_1755	0.0253			BITYA_OGPRCC_100ng_1755	0.0253
BITYA_OGPRCC_100ng_1795	0.0196			BITYA_OGPRCC_100ng_1795	0.0196
BITYA_OVX_CBD_1	0.0442	0.0334714		Bitya_CBD2_12w_sh1	0.0336	0.0342571
BITYA_OVX_CBD_2	0.0399			Bitya_CBD2_12w_sh2	0.0395
BITYA_OVX_CBD_3	0.0363			Bitya_CBD2_12w_sh3	0.0271
BITYA_OVX_CBD_4	0.0226			Bitya_CBD2_12w_sh4	0.0394
BITYA_OVX_CBD_5	0.0392			Bitya_CBD2_12w_sh5	0.038
BITYA_OVX_CBD_6	0.0232			Bitya_CBD2_12w_sh6
BITYA_OVX_CBD_7	0.0289			Bitya_CBD2_12w_sh7	0.0178
BITYA_OVX_6WK_1	0.0278	0.0228714		Bitya_CBD2_12w_sh8	0.0444
BITYA_OVX_6WK_2	0.019
BITYA_OVX_6WK_3	0.0242
BITYA_OVX_6WK_4	0.0265
BITYA_OVX_6WK_5	0.0162
BITYA_OVX_6WK_6	0.0283
BITYA_OVX_6WK_7	0.0181
BITYA_SHAM_6WK_1	0.0533	0.04935
BITYA_SHAM_6WK_2	0.0566
BITYA_SHAM_6WK_3	0.039
BITYA_SHAM_6WK_4	0.0485
BITYA_SHAM_12WK_1	0.0504	0.05264
BITYA_SHAM_12WK_2	0.0464
BITYA_SHAM_12WK_3	0.0442
BITYA_SHAM_12WK_4	0.043
BITYA_SHAM_12WK_5	0.0644
BITYA_SHAM_12WK_6	0.0731
BITYA_SHAM_12WK_7	0.0437
BITYA_SHAM_12WK_8	0.0722
BITYA_SHAM_12WK_9	0.0406
BITYA_SHAM_12WK_10	0.0484
BITYA_12wOVX_CB2KO_1OGP1		0.0444889
BITYA_12wOVX_CB2KO_1OGP2	0.0229
BITYA_12wOVX_CB2KO_1OGP3	0.0696
BITYA_12wOVX_CB2KO_1OGP4	0.0354
BITYA_12wOVX_CB2KO_1OGP6	0.0436
BITYA_12wOVX_CB2KO_2OGP1	0.0393
BITYA_12wOVX_CB2KO_2OGP3	0.0657
BITYA_12wOVX_CB2KO_2OGP5	0.0369
BITYA_12wOVX_CB2KO_2OGP6	0.042
BITYA_12wOVX_CB2KO_2OGP7	0.045
BITYA_12wOVX_CB2KO_3c1	0.0535	0.04361
BITYA_12wOVX_CB2KO_3c2	0.0287
BITYA_12wOVX_CB2KO_3c3	0.0401
BITYA_12wOVX_CB2KO_3c4	0.0345
BITYA_12wOVX_CB2KO_3c5	0.0379
BITYA_12wOVX_CB2KO_4c1	0.0522
BITYA_12wOVX_CB2KO_4c2	0.0693
BITYA_12wOVX_CB2KO_4c3	0.0352
BITYA_12wOVX_CB2KO_4c4	0.0548
BITYA_12wOVX_CB2KO_4c5	0.0299
BITYA_12wSHAM_CB2KO_1c1	0.0787	0.07201
BITYA_12wSHAM_CB2KO_1c2	0.0904
BITYA_12wSHAM_CB2KO_1c3	0.0922
BITYA_12wSHAM_CB2KO_1c4	0.0757
BITYA_12wSHAM_CB2KO_1c5	0.0698
BITYA_12wSHAM_CB2KO_2c1	0.0676
BITYA_12wSHAM_CB2KO_2c2	0.056
BITYA_12wSHAM_CB2KO_2c3	0.0684								s-ko	v-ko
BITYA_12wSHAM_CB2KO_2c4	0.0531								0.0787	0.0535
BITYA_12wSHAM_CB2KO_2c5	0.0682					s-wt	v-wt		0.0904	0.0287
Bitya_CBD2_12w_sh1	0.0336	0.0342571				0.0336	0.016		0.0922	0.0401
Bitya_CBD2_12w_sh2	0.0395					0.0395	0.0153		0.0757	0.0345
Bitya_CBD2_12w_sh3	0.0271					0.0271	0.0136		0.0698	0.0379
Bitya_CBD2_12w_sh4	0.0394					0.0394	0.0202		0.0676	0.0522
Bitya_CBD2_12w_sh5	0.038					0.038	0.012		0.056	0.0693
Bitya_CBD2_12w_sh6							0.0248		0.0684	0.0352
Bitya_CBD2_12w_sh7	0.0178					0.0178	0.0141		0.0531	0.0548
Bitya_CBD2_12w_sh8	0.0444					0.0444	0.0164		0.0682	0.0299
Bitya_CBD2_12w_CBD1	0.0173	0.022025			average	0.0342571	0.01655		0.07201	0.04361
Bitya_CBD2_12w_CBD2	0.0217
Bitya_CBD2_12w_CBD3	0.0302					ttest	0.000248832			0.000117861
Bitya_CBD2_12w_CBD4	0.0196					%change	-0.516889			-0.39439
Bitya_CBD2_12w_CBD5	0.0139
Bitya_CBD2_12w_CBD6	0.0224
Bitya_CBD2_12w_CBD7	0.0239
Bitya_CBD2_12w_CBD8	0.0272
Bitya_CBD2_12w_OVX_Veh1	0.0178	0.02075
Bitya_CBD2_12w_OVX_Veh2	0.0138
Bitya_CBD2_12w_OVX_Veh3	0.0283
Bitya_CBD2_12w_OVX_Veh4	0.0147
Bitya_CBD2_12w_OVX_Veh5	0.0219
Bitya_CBD2_12w_OVX_Veh6	0.0224
Bitya_CBD2_12w_OVX_Veh7	0.0262
Bitya_CBD2_12w_OVX_Veh8	0.0209

## Sheet: Full bone
SampName	SampNo	MeasNo	MeasDate	Filename	S-DOB	S-Remark	Meas-Rmk	Site	Sigma	Support	Threshold	Unit	Data-Threshold	VOX-TV	VOX-BV	VOX-BV/TV	Conn-Dens.	TRI-SMI	DT-Tb.N*	DT-Tb.Th*	DT-Tb.Sp*	DT-Tb.(1/N).SD*	DT-Tb.Th.SD*	DT-Tb.Sp.SD*	Mean1	Mean2	Mean3	Mean4	Mean5	Mean-Units	TRI-TV	TRI-BV	TRI-BV/TV	TRI-BS	TRI-BS/BV	TRI-Tb.N	TRI-Tb.Th	TRI-Tb.Sp	TRI-DA	TRI-|H1|	TRI-|H2|	TRI-|H3|	TRI-H1x	TRI-H1y	TRI-H1z	TRI-H2x	TRI-H2y	TRI-H2z	TRI-H3x
BITYA_OGPRCC_V_1784	2722	4922	2016-04-10 15:23:00	R0001919				Custom	0.8	1	165	6	5406	~ 33.140	~ 14.567	0.439	-	-	-	-	-	-	-	-	499.429	-	-	-	-	[mg HA/ccm]	-	-	-	-	-	-	-	-	-	-	-	-	-	-	-	-	-	-	-
BITYA_OGPRCC_V_1758	2723	4923	2016-04-10 15:23:00	R0001919				Custom	0.8	1	165	6	5406	~ 36.774	~ 15.486	0.421	-	-	-	-	-	-	-	-	477.427	-	-	-	-	[mg HA/ccm]	-	-	-	-	-	-	-	-	-	-	-	-	-	-	-	-	-	-	-
BITYA_OGPRCC_V_1_1	2724	4926	2016-04-10 15:23:00	R0001919				Custom	0.8	1	165	6	5406	~ 32.374	~ 14.552	0.449	-	-	-	-	-	-	-	-	521.158	-	-	-	-	[mg HA/ccm]	-	-	-	-	-	-	-	-	-	-	-	-	-	-	-	-	-	-	-
BITYA_OGPRCC_V_1_2	2725	4927	2016-04-10 15:23:00	R0001919				Custom	0.8	1	165	6	5406	~ 31.707	~ 14.516	0.457	-	-	-	-	-	-	-	-	518.834	-	-	-	-	[mg HA/ccm]	-	-	-	-	-	-	-	-	-	-	-	-	-	-	-	-	-	-	-
BITYA_OGPRCC_V_2_1	2726	4962	2016-04-10 15:23:00	R0001919				Custom	0.8	1	165	6	5406	~ 31.256	~ 14.141	0.452	-	-	-	-	-	-	-	-	512.958	-	-	-	-	[mg HA/ccm]	-	-	-	-	-	-	-	-	-	-	-	-	-	-	-	-	-	-	-
BITYA_OGPRCC_V_2_2	2727	4929	2016-04-10 23:20:00	R0001920				Custom	0.8	1	165	6	5406	~ 32.401	~ 14.929	0.46	-	-	-	-	-	-	-	-	540.153	-	-	-	-	[mg HA/ccm]	-	-	-	-	-	-	-	-	-	-	-	-	-	-	-	-	-	-	-
BITYA_OGPRCC_V_1785	2728	4930	2016-04-10 23:20:00	R0001920				Custom	0.8	1	165	6	5406	~ 31.155	~ 14.346	0.46	-	-	-	-	-	-	-	-	541.246	-	-	-	-	[mg HA/ccm]	-	-	-	-	-	-	-	-	-	-	-	-	-	-	-	-	-	-	-
BITYA_OGPRCC_V_1760	2729	4931	2016-04-10 23:20:00	R0001920				Custom	0.8	1	165	6	5406	~ 35.442	~ 15.274	0.431	-	-	-	-	-	-	-	-	512.685	-	-	-	-	[mg HA/ccm]	-	-	-	-	-	-	-	-	-	-	-	-	-	-	-	-	-	-	-
BITYA_OGPRCC_10ng_1799	2730	4932	2016-04-10 23:20:00	R0001920				Custom	0.8	1	165	6	5406	~ 33.828	~ 15.609	0.461	-	-	-	-	-	-	-	-	552.725	-	-	-	-	[mg HA/ccm]	-	-	-	-	-	-	-	-	-	-	-	-	-	-	-	-	-	-	-
BITYA_OGPRCC_10ng_1779	2731	4933	2016-04-10 23:20:00	R0001920				Custom	0.8	1	165	6	5406	~ 33.855	~ 14.926	0.44	-	-	-	-	-	-	-	-	519.518	-	-	-	-	[mg HA/ccm]	-	-	-	-	-	-	-	-	-	-	-	-	-	-	-	-	-	-	-
BITYA_OGPRCC_10ng_1783	2732	4934	2016-04-11 08:18:00	R0001921				Custom	0.8	1	165	6	5406	~ 35.621	~ 16.363	0.459	-	-	-	-	-	-	-	-	546.439	-	-	-	-	[mg HA/ccm]	-	-	-	-	-	-	-	-	-	-	-	-	-	-	-	-	-	-	-
BITYA_OGPRCC_10ng_1759	2733	4935	2016-04-11 08:18:00	R0001921				Custom	0.8	1	165	6	5406	~ 37.393	~ 15.818	0.423	-	-	-	-	-	-	-	-	495.603	-	-	-	-	[mg HA/ccm]	-	-	-	-	-	-	-	-	-	-	-	-	-	-	-	-	-	-	-
BITYA_OGPRCC_10ng_1777	2734	4936	2016-04-11 08:18:00	R0001921				Custom	0.8	1	165	6	5406	~ 31.557	~ 14.280	0.452	-	-	-	-	-	-	-	-	535.097	-	-	-	-	[mg HA/ccm]	-	-	-	-	-	-	-	-	-	-	-	-	-	-	-	-	-	-	-
BITYA_OGPRCC_10ng_1793	2735	4938	2016-04-11 08:18:00	R0001921				Custom	0.8	1	165	6	5406	~ 33.344	~ 14.301	0.428	-	-	-	-	-	-	-	-	515.281	-	-	-	-	[mg HA/ccm]	-	-	-	-	-	-	-	-	-	-	-	-	-	-	-	-	-	-	-
BITYA_OGPRCC_10ng_1763	2736	4939	2016-04-11 08:18:00	R0001921				Custom	0.8	1	165	6	5406	~ 31.008	~ 13.988	0.451	-	-	-	-	-	-	-	-	533.457	-	-	-	-	[mg HA/ccm]	-	-	-	-	-	-	-	-	-	-	-	-	-	-	-	-	-	-	-
BITYA_OGPRCC_10ng_cage4	2737	4940	2016-04-11 18:29:00	R0001922				Custom	0.8	1	165	6	5406	~ 29.996	~ 13.029	0.434	-	-	-	-	-	-	-	-	508.175	-	-	-	-	[mg HA/ccm]	-	-	-	-	-	-	-	-	-	-	-	-	-	-	-	-	-	-	-
BITYA_OGPRCC_100ng_1726	2738	4941	2016-04-11 18:29:00	R0001922				Custom	0.8	1	165	6	5406	~ 30.879	~ 14.255	0.461	-	-	-	-	-	-	-	-	559.558	-	-	-	-	[mg HA/ccm]	-	-	-	-	-	-	-	-	-	-	-	-	-	-	-	-	-	-	-
BITYA_OGPRCC_100ng_1797	2739	4942	2016-04-11 18:29:00	R0001922				Custom	0.8	1	165	6	5406	~ 34.125	~ 14.179	0.415	-	-	-	-	-	-	-	-	492.323	-	-	-	-	[mg HA/ccm]	-	-	-	-	-	-	-	-	-	-	-	-	-	-	-	-	-	-	-
BITYA_OGPRCC_100ng_1796	2740	4943	2016-04-11 18:29:00	R0001922				Custom	0.8	1	165	6	5406	~ 32.542	~ 14.271	0.438	-	-	-	-	-	-	-	-	527.034	-	-	-	-	[mg HA/ccm]	-	-	-	-	-	-	-	-	-	-	-	-	-	-	-	-	-	-	-
BITYA_OGPRCC_100ng_1762	2741	4944	2016-04-11 18:29:00	R0001922				Custom	0.8	1	165	6	5406	~ 30.778	~ 13.547	0.44	-	-	-	-	-	-	-	-	508.175	-	-	-	-	[mg HA/ccm]	-	-	-	-	-	-	-	-	-	-	-	-	-	-	-	-	-	-	-
BITYA_OGPRCC_100ng_1798	2742	4945	2016-04-12 02:51:00	R0001923				Custom	0.8	1	165	6	5406	~ 33.576	~ 16.148	0.481	-	-	-	-	-	-	-	-	586.616	-	-	-	-	[mg HA/ccm]	-	-	-	-	-	-	-	-	-	-	-	-	-	-	-	-	-	-	-
BITYA_OGPRCC_100ng_1792	2743	4946	2016-04-12 02:51:00	R0001923				Custom	0.8	1	165	6	5406	~ 33.637	~ 15.823	0.47	-	-	-	-	-	-	-	-	575.684	-	-	-	-	[mg HA/ccm]	-	-	-	-	-	-	-	-	-	-	-	-	-	-	-	-	-	-	-
BITYA_OGPRCC_100ng_1755	2744	4947	2016-04-12 02:51:00	R0001923				Custom	0.8	1	165	6	5406	~ 32.274	~ 14.693	0.455	-	-	-	-	-	-	-	-	556.825	-	-	-	-	[mg HA/ccm]	-	-	-	-	-	-	-	-	-	-	-	-	-	-	-	-	-	-	-
BITYA_OGPRCC_100ng_1795	2745	4961	2016-04-12 02:51:00	R0001923				Custom	0.8	1	165	6	5406	~ 33.792	~ 16.317	0.482	-	-	-	-	-	-	-	-	587.983	-	-	-	-	[mg HA/ccm]	-	-	-	-	-	-	-	-	-	-	-	-	-	-	-	-	-	-	-
BITYA_OVX_CBD_1	3113	5879	2016-09-27 14:18:00	R0002314				Custom	0.8	1	160	6	5242	~ 35.685	~ 17.852	0.5	-	-	-	-	-	-	-	-	499.272	-	-	-	-	[mg HA/ccm]	-	-	-	-	-	-	-	-	-	-	-	-	-	-	-	-	-	-	-
BITYA_OVX_CBD_2	3114	5880	2016-09-27 14:18:00	R0002314				Custom	0.8	1	160	6	5242	~ 34.331	~ 16.971	0.494	-	-	-	-	-	-	-	-	488.289	-	-	-	-	[mg HA/ccm]	-	-	-	-	-	-	-	-	-	-	-	-	-	-	-	-	-	-	-
BITYA_OVX_CBD_3	3115	5881	2016-09-27 14:18:00	R0002314				Custom	0.8	1	160	6	5242	~ 35.692	~ 16.631	0.466	-	-	-	-	-	-	-	-	463.011	-	-	-	-	[mg HA/ccm]	-	-	-	-	-	-	-	-	-	-	-	-	-	-	-	-	-	-	-
BITYA_OVX_CBD_4	3116	5882	2016-09-27 14:18:00	R0002314				Custom	0.8	1	160	6	5242	~ 35.791	~ 16.614	0.464	-	-	-	-	-	-	-	-	462.064	-	-	-	-	[mg HA/ccm]	-	-	-	-	-	-	-	-	-	-	-	-	-	-	-	-	-	-	-
BITYA_OVX_CBD_5	3117	5883	2016-09-27 14:18:00	R0002314				Custom	0.8	1	160	6	5242	~ 35.422	~ 17.452	0.492	-	-	-	-	-	-	-	-	496.053	-	-	-	-	[mg HA/ccm]	-	-	-	-	-	-	-	-	-	-	-	-	-	-	-	-	-	-	-
BITYA_OVX_CBD_6	3118	6051	2016-09-27 19:27:00	R0002315				Custom	0.8	1	160	6	5242	~ 33.559	~ 16.720	0.498	-	-	-	-	-	-	-	-	489.615	-	-	-	-	[mg HA/ccm]	-	-	-	-	-	-	-	-	-	-	-	-	-	-	-	-	-	-	-
BITYA_OVX_CBD_7	3119	6052	2016-09-27 19:27:00	R0002315				Custom	0.8	1	160	6	5242	~ 35.483	~ 16.985	0.478	-	-	-	-	-	-	-	-	474.562	-	-	-	-	[mg HA/ccm]	-	-	-	-	-	-	-	-	-	-	-	-	-	-	-	-	-	-	-
BITYA_OVX_6WK_1	3076	5670	2016-09-05 10:14:00	R0002251				Custom	0.8	1	160	6	5242	~ 30.360	~ 12.232	0.402	-	-	-	-	-	-	-	-	467.597	-	-	-	-	[mg HA/ccm]	-	-	-	-	-	-	-	-	-	-	-	-	-	-	-	-	-	-	-
BITYA_OVX_6WK_2	3077	5671	2016-09-05 10:14:00	R0002251				Custom	0.8	1	160	6	5242	~ 31.595	~ 13.079	0.414	-	-	-	-	-	-	-	-	476.901	-	-	-	-	[mg HA/ccm]	-	-	-	-	-	-	-	-	-	-	-	-	-	-	-	-	-	-	-
BITYA_OVX_6WK_3	3078	5908	2016-09-05 10:14:00	R0002251				Custom	0.8	1	160	6	5242	~ 32.257	~ 13.044	0.404	-	-	-	-	-	-	-	-	466.913	-	-	-	-	[mg HA/ccm]	-	-	-	-	-	-	-	-	-	-	-	-	-	-	-	-	-	-	-
BITYA_OVX_6WK_4	3079	5909	2016-09-27 16:00:00	R0002251				Custom	0.8	1	160	6	5242	~ 31.688	~ 13.471	0.425	-	-	-	-	-	-	-	-	492.227	-	-	-	-	[mg HA/ccm]	-	-	-	-	-	-	-	-	-	-	-	-	-	-	-	-	-	-	-
BITYA_OVX_6WK_5	3080	6152	2016-09-05 10:14:00	R0002251				Custom	0.8	1	160	6	5242	~ 32.334	~ 13.481	0.416	-	-	-	-	-	-	-	-	477.038	-	-	-	-	[mg HA/ccm]	-	-	-	-	-	-	-	-	-	-	-	-	-	-	-	-	-	-	-
BITYA_OVX_6WK_6	3081	5650	2016-09-06 18:35:00	R0002252				Custom	0.8	1	160	6	5242	~ 31.422	~ 13.138	0.418	-	-	-	-	-	-	-	-	482.238	-	-	-	-	[mg HA/ccm]	-	-	-	-	-	-	-	-	-	-	-	-	-	-	-	-	-	-	-
BITYA_OVX_6WK_7	3082	5691	2016-09-06 18:35:00	R0002252				Custom	0.8	1	160	6	5242	~ 33.046	~ 13.986	0.423	-	-	-	-	-	-	-	-	493.595	-	-	-	-	[mg HA/ccm]	-	-	-	-	-	-	-	-	-	-	-	-	-	-	-	-	-	-	-
BITYA_SHAM_6WK_1	3083	5692	2016-09-06 18:35:00	R0002252				Custom	0.8	1	160	6	5242	~ 31.087	~ 15.279	0.491	-	-	-	-	-	-	-	-	581.442	-	-	-	-	[mg HA/ccm]	-	-	-	-	-	-	-	-	-	-	-	-	-	-	-	-	-	-	-
BITYA_SHAM_6WK_2	3084	5693	2016-09-06 18:35:00	R0002252				Custom	0.8	1	160	6	5242	~ 31.518	~ 14.789	0.469	-	-	-	-	-	-	-	-	547.781	-	-	-	-	[mg HA/ccm]	-	-	-	-	-	-	-	-	-	-	-	-	-	-	-	-	-	-	-
BITYA_SHAM_6WK_3	3085	5694	2016-09-06 18:35:00	R0002252				Custom	0.8	1	160	6	5242	~ 30.514	~ 12.776	0.418	-	-	-	-	-	-	-	-	479.091	-	-	-	-	[mg HA/ccm]	-	-	-	-	-	-	-	-	-	-	-	-	-	-	-	-	-	-	-
BITYA_SHAM_6WK_4	3086	5695	2016-09-07 04:44:00	R0002253				Custom	0.8	1	160	6	5242	~ 33.355	~ 16.271	0.487	-	-	-	-	-	-	-	-	555.854	-	-	-	-	[mg HA/ccm]	-	-	-	-	-	-	-	-	-	-	-	-	-	-	-	-	-	-	-
BITYA_SHAM_12WK_1	3120	6053	2016-09-27 19:27:00	R0002315				Custom	0.8	1	160	6	5242	~ 35.254	~ 19.216	0.545	-	-	-	-	-	-	-	-	574.824	-	-	-	-	[mg HA/ccm]	-	-	-	-	-	-	-	-	-	-	-	-	-	-	-	-	-	-	-
BITYA_SHAM_12WK_2	3121	6054	2016-09-27 19:27:00	R0002315				Custom	0.8	1	160	6	5242	~ 34.370	~ 18.436	0.536	-	-	-	-	-	-	-	-	547.178	-	-	-	-	[mg HA/ccm]	-	-	-	-	-	-	-	-	-	-	-	-	-	-	-	-	-	-	-
BITYA_SHAM_12WK_3	3122	6055	2016-09-27 19:27:00	R0002315				Custom	0.8	1	160	6	5242	~ 35.147	~ 18.829	0.535	-	-	-	-	-	-	-	-	552.291	-	-	-	-	[mg HA/ccm]	-	-	-	-	-	-	-	-	-	-	-	-	-	-	-	-	-	-	-
BITYA_SHAM_12WK_4	3123	5884	2016-09-28 00:27:00	R0002316				Custom	0.8	1	160	6	5242	~ 35.698	~ 19.381	0.542	-	-	-	-	-	-	-	-	556.74	-	-	-	-	[mg HA/ccm]	-	-	-	-	-	-	-	-	-	-	-	-	-	-	-	-	-	-	-
BITYA_SHAM_12WK_5	3124	5885	2016-09-28 00:27:00	R0002316				Custom	0.8	1	160	6	5242	~ 37.660	~ 20.382	0.541	-	-	-	-	-	-	-	-	552.859	-	-	-	-	[mg HA/ccm]	-	-	-	-	-	-	-	-	-	-	-	-	-	-	-	-	-	-	-
BITYA_SHAM_12WK_6	3125	5886	2016-09-28 00:27:00	R0002316				Custom	0.8	1	160	6	5242	~ 31.531	~ 17.658	0.56	-	-	-	-	-	-	-	-	591.865	-	-	-	-	[mg HA/ccm]	-	-	-	-	-	-	-	-	-	-	-	-	-	-	-	-	-	-	-
BITYA_SHAM_12WK_7	3126	5887	2016-09-28 00:27:00	R0002316				Custom	0.8	1	160	6	5242	~ 33.128	~ 17.468	0.527	-	-	-	-	-	-	-	-	546.231	-	-	-	-	[mg HA/ccm]	-	-	-	-	-	-	-	-	-	-	-	-	-	-	-	-	-	-	-
BITYA_SHAM_12WK_8	3127	5888	2016-09-28 00:27:00	R0002316				Custom	0.8	1	160	6	5242	~ 36.542	~ 20.906	0.572	-	-	-	-	-	-	-	-	595.842	-	-	-	-	[mg HA/ccm]	-	-	-	-	-	-	-	-	-	-	-	-	-	-	-	-	-	-	-
BITYA_SHAM_12WK_9	3128	5889	2016-09-28 05:26:00	R0002317				Custom	0.8	1	160	6	5242	~ 34.934	~ 19.112	0.547	-	-	-	-	-	-	-	-	585.143	-	-	-	-	[mg HA/ccm]	-	-	-	-	-	-	-	-	-	-	-	-	-	-	-	-	-	-	-
BITYA_SHAM_12WK_10	3129	5890	2016-09-28 05:26:00	R0002317				Custom	0.8	1	160	6	5242	~ 38.340	~ 21.585	0.563	-	-	-	-	-	-	-	-	616.292	-	-	-	-	[mg HA/ccm]	-	-	-	-	-	-	-	-	-	-	-	-	-	-	-	-	-	-	-
BITYA_12wOVX_CB2KO_1OGP1	3682	6586	2017-03-08 05:42:00	R0002603				Custom	0.8	1	160	6	5242	~ 44.381	~ 19.616	0.442	-	-	-	-	-	-	-	-	507.005	-	-	-	-	[mg HA/ccm]	-	-	-	-	-	-	-	-	-	-	-	-	-	-	-	-	-	-	-
BITYA_12wOVX_CB2KO_1OGP2	3683	6587	2017-03-08 05:42:00	R0002603				Custom	0.8	1	160	6	5242	~ 40.769	~ 18.277	0.448	-	-	-	-	-	-	-	-	527.667	-	-	-	-	[mg HA/ccm]	-	-	-	-	-	-	-	-	-	-	-	-	-	-	-	-	-	-	-
BITYA_12wOVX_CB2KO_1OGP3	3684	6588	2017-03-08 05:42:00	R0002603				Custom	0.8	1	160	6	5242	~ 43.483	~ 21.962	0.505	-	-	-	-	-	-	-	-	611.682	-	-	-	-	[mg HA/ccm]	-	-	-	-	-	-	-	-	-	-	-	-	-	-	-	-	-	-	-
BITYA_12wOVX_CB2KO_1OGP4	3685	6589	2017-03-08 05:42:00	R0002603				Custom	0.8	1	160	6	5242	~ 44.626	~ 19.355	0.433	-	-	-	-	-	-	-	-	507.826	-	-	-	-	[mg HA/ccm]	-	-	-	-	-	-	-	-	-	-	-	-	-	-	-	-	-	-	-
BITYA_12wOVX_CB2KO_1OGP6	3686	6590	2017-03-08 05:42:00	R0002603				Custom	0.8	1	160	6	5242	~ 36.244	~ 15.228	0.42	-	-	-	-	-	-	-	-	486.48	-	-	-	-	[mg HA/ccm]	-	-	-	-	-	-	-	-	-	-	-	-	-	-	-	-	-	-	-
BITYA_12wOVX_CB2KO_2OGP1	3687	6591	2017-03-08 09:31:00	R0002604				Custom	0.8	1	160	6	5242	~ 43.098	~ 19.806	0.459	-	-	-	-	-	-	-	-	528.487	-	-	-	-	[mg HA/ccm]	-	-	-	-	-	-	-	-	-	-	-	-	-	-	-	-	-	-	-
BITYA_12wOVX_CB2KO_2OGP3	3688	6592	2017-03-08 09:31:00	R0002604				Custom	0.8	1	160	6	5242	~ 44.018	~ 21.592	0.49	-	-	-	-	-	-	-	-	582.673	-	-	-	-	[mg HA/ccm]	-	-	-	-	-	-	-	-	-	-	-	-	-	-	-	-	-	-	-
BITYA_12wOVX_CB2KO_2OGP5	3689	6593	2017-03-08 09:31:00	R0002604				Custom	0.8	1	160	6	5242	~ 41.215	~ 19.705	0.478	-	-	-	-	-	-	-	-	569.948	-	-	-	-	[mg HA/ccm]	-	-	-	-	-	-	-	-	-	-	-	-	-	-	-	-	-	-	-
BITYA_12wOVX_CB2KO_2OGP6	3690	6594	2017-03-08 09:31:00	R0002604				Custom	0.8	1	160	6	5242	~ 42.100	~ 18.792	0.446	-	-	-	-	-	-	-	-	534.235	-	-	-	-	[mg HA/ccm]	-	-	-	-	-	-	-	-	-	-	-	-	-	-	-	-	-	-	-
BITYA_12wOVX_CB2KO_2OGP7	3691	6595	2017-03-08 09:31:00	R0002604				Custom	0.8	1	160	6	5242	~ 36.197	~ 17.134	0.473	-	-	-	-	-	-	-	-	565.706	-	-	-	-	[mg HA/ccm]	-	-	-	-	-	-	-	-	-	-	-	-	-	-	-	-	-	-	-
BITYA_12wOVX_CB2KO_3c1	3692	6596	2017-03-08 13:43:00	R0002605				Custom	0.8	1	160	6	5242	~ 45.242	~ 22.692	0.501	-	-	-	-	-	-	-	-	587.736	-	-	-	-	[mg HA/ccm]	-	-	-	-	-	-	-	-	-	-	-	-	-	-	-	-	-	-	-
BITYA_12wOVX_CB2KO_3c2	3693	6597	2017-03-08 13:43:00	R0002605				Custom	0.8	1	160	6	5242	~ 41.939	~ 19.341	0.461	-	-	-	-	-	-	-	-	541.487	-	-	-	-	[mg HA/ccm]	-	-	-	-	-	-	-	-	-	-	-	-	-	-	-	-	-	-	-
BITYA_12wOVX_CB2KO_3c3	3694	6598	2017-03-08 13:43:00	R0002605				Custom	0.8	1	160	6	5242	~ 41.558	~ 20.156	0.485	-	-	-	-	-	-	-	-	573.779	-	-	-	-	[mg HA/ccm]	-	-	-	-	-	-	-	-	-	-	-	-	-	-	-	-	-	-	-
BITYA_12wOVX_CB2KO_3c4	3695	6599	2017-03-08 13:43:00	R0002605				Custom	0.8	1	160	6	5242	~ 40.253	~ 19.209	0.477	-	-	-	-	-	-	-	-	568.58	-	-	-	-	[mg HA/ccm]	-	-	-	-	-	-	-	-	-	-	-	-	-	-	-	-	-	-	-
BITYA_12wOVX_CB2KO_3c5	3696	6600	2017-03-08 13:43:00	R0002605				Custom	0.8	1	160	6	5242	~ 39.389	~ 18.278	0.464	-	-	-	-	-	-	-	-	537.792	-	-	-	-	[mg HA/ccm]	-	-	-	-	-	-	-	-	-	-	-	-	-	-	-	-	-	-	-
BITYA_12wOVX_CB2KO_4c1	3697	6601	2017-03-08 17:34:00	R0002606				Custom	0.8	1	160	6	5242	~ 43.150	~ 22.115	0.512	-	-	-	-	-	-	-	-	595.809	-	-	-	-	[mg HA/ccm]	-	-	-	-	-	-	-	-	-	-	-	-	-	-	-	-	-	-	-
BITYA_12wOVX_CB2KO_4c2	3698	6602	2017-03-08 17:34:00	R0002606				Custom	0.8	1	160	6	5242	~ 34.288	~ 17.337	0.505	-	-	-	-	-	-	-	-	594.168	-	-	-	-	[mg HA/ccm]	-	-	-	-	-	-	-	-	-	-	-	-	-	-	-	-	-	-	-
BITYA_12wOVX_CB2KO_4c3	3699	6603	2017-03-08 17:34:00	R0002606				Custom	0.8	1	160	6	5242	~ 44.315	~ 19.936	0.449	-	-	-	-	-	-	-	-	531.908	-	-	-	-	[mg HA/ccm]	-	-	-	-	-	-	-	-	-	-	-	-	-	-	-	-	-	-	-
BITYA_12wOVX_CB2KO_4c4	3700	6604	2017-03-08 17:34:00	R0002606				Custom	0.8	1	160	6	5242	~ 43.373	~ 22.259	0.513	-	-	-	-	-	-	-	-	613.05	-	-	-	-	[mg HA/ccm]	-	-	-	-	-	-	-	-	-	-	-	-	-	-	-	-	-	-	-
BITYA_12wOVX_CB2KO_4c5	3701	6605	2017-03-08 17:34:00	R0002606				Custom	0.8	1	160	6	5242	~ 43.041	~ 19.825	0.46	-	-	-	-	-	-	-	-	523.014	-	-	-	-	[mg HA/ccm]	-	-	-	-	-	-	-	-	-	-	-	-	-	-	-	-	-	-	-
BITYA_12wSHAM_CB2KO_1c1	3702	6606	2017-03-08 21:23:00	R0002607				Custom	0.8	1	160	6	5242	~ 46.790	~ 25.144	0.537	-	-	-	-	-	-	-	-	630.428	-	-	-	-	[mg HA/ccm]	-	-	-	-	-	-	-	-	-	-	-	-	-	-	-	-	-	-	-
BITYA_12wSHAM_CB2KO_1c2	3703	6607	2017-03-08 21:23:00	R0002607				Custom	0.8	1	160	6	5242	~ 40.273	~ 20.583	0.511	-	-	-	-	-	-	-	-	588.694	-	-	-	-	[mg HA/ccm]	-	-	-	-	-	-	-	-	-	-	-	-	-	-	-	-	-	-	-
BITYA_12wSHAM_CB2KO_1c3	3704	6608	2017-03-08 21:23:00	R0002607				Custom	0.8	1	160	6	5242	~ 43.021	~ 22.731	0.528	-	-	-	-	-	-	-	-	631.933	-	-	-	-	[mg HA/ccm]	-	-	-	-	-	-	-	-	-	-	-	-	-	-	-	-	-	-	-
BITYA_12wSHAM_CB2KO_1c4	3705	6609	2017-03-08 21:23:00	R0002607				Custom	0.8	1	160	6	5242	~ 42.172	~ 23.016	0.545	-	-	-	-	-	-	-	-	655.058	-	-	-	-	[mg HA/ccm]	-	-	-	-	-	-	-	-	-	-	-	-	-	-	-	-	-	-	-
BITYA_12wSHAM_CB2KO_1c5	3706	6610	2017-03-08 21:23:00	R0002607				Custom	0.8	1	160	6	5242	~ 43.645	~ 22.036	0.504	-	-	-	-	-	-	-	-	587.736	-	-	-	-	[mg HA/ccm]	-	-	-	-	-	-	-	-	-	-	-	-	-	-	-	-	-	-	-
BITYA_12wSHAM_CB2KO_2c1	3707	6613	2017-03-09 01:10:00	R0002608				Custom	0.8	1	160	6	5242	~ 40.962	~ 21.777	0.531	-	-	-	-	-	-	-	-	615.65	-	-	-	-	[mg HA/ccm]	-	-	-	-	-	-	-	-	-	-	-	-	-	-	-	-	-	-	-
BITYA_12wSHAM_CB2KO_2c2	3708	6614	2017-03-09 01:10:00	R0002608				Custom	0.8	1	160	6	5242	~ 44.351	~ 23.035	0.519	-	-	-	-	-	-	-	-	627.418	-	-	-	-	[mg HA/ccm]	-	-	-	-	-	-	-	-	-	-	-	-	-	-	-	-	-	-	-
BITYA_12wSHAM_CB2KO_2c3	3709	6615	2017-03-09 01:10:00	R0002608				Custom	0.8	1	160	6	5242	~ 40.471	~ 21.305	0.526	-	-	-	-	-	-	-	-	634.26	-	-	-	-	[mg HA/ccm]	-	-	-	-	-	-	-	-	-	-	-	-	-	-	-	-	-	-	-
BITYA_12wSHAM_CB2KO_2c4	3710	6616	2017-03-09 01:10:00	R0002608				Custom	0.8	1	160	6	5242	~ 41.732	~ 21.083	0.505	-	-	-	-	-	-	-	-	592.389	-	-	-	-	[mg HA/ccm]	-	-	-	-	-	-	-	-	-	-	-	-	-	-	-	-	-	-	-
BITYA_12wSHAM_CB2KO_2c5	3711	6617	2017-03-09 01:10:00	R0002608				Custom	0.8	1	160	6	5242	~ 42.495	~ 22.504	0.529	-	-	-	-	-	-	-	-	629.47	-	-	-	-	[mg HA/ccm]	-	-	-	-	-	-	-	-	-	-	-	-	-	-	-	-	-	-	-
Bitya_CBD2_12w_sh1	3781	6807	2017-04-26 12:38:00	R0002695				Custom	0.8	1	160	6	5242	~ 32.131	~ 14.726	0.458	-	-	-	-	-	-	-	-	526.982	-	-	-	-	[mg HA/ccm]	-	-	-	-	-	-	-	-	-	-	-	-	-	-	-	-	-	-	-
Bitya_CBD2_12w_sh2	3782	6808	2017-04-26 12:38:00	R0002695				Custom	0.8	1	160	6	5242	~ 31.443	~ 14.317	0.455	-	-	-	-	-	-	-	-	532.456	-	-	-	-	[mg HA/ccm]	-	-	-	-	-	-	-	-	-	-	-	-	-	-	-	-	-	-	-
Bitya_CBD2_12w_sh3	3783	6809	2017-04-26 12:38:00	R0002695				Custom	0.8	1	160	6	5242	~ 30.361	~ 14.455	0.476	-	-	-	-	-	-	-	-	565.706	-	-	-	-	[mg HA/ccm]	-	-	-	-	-	-	-	-	-	-	-	-	-	-	-	-	-	-	-
Bitya_CBD2_12w_sh4	3784	6810	2017-04-26 12:38:00	R0002695				Custom	0.8	1	160	6	5242	~ 31.216	~ 14.612	0.468	-	-	-	-	-	-	-	-	551.202	-	-	-	-	[mg HA/ccm]	-	-	-	-	-	-	-	-	-	-	-	-	-	-	-	-	-	-	-
Bitya_CBD2_12w_sh5	3785	6811	2017-04-26 12:38:00	R0002695				Custom	0.8	1	160	6	5242	~ 32.297	~ 14.827	0.459	-	-	-	-	-	-	-	-	540.118	-	-	-	-	[mg HA/ccm]	-	-	-	-	-	-	-	-	-	-	-	-	-	-	-	-	-	-	-
Bitya_CBD2_12w_sh6	3762	6788	2017-04-25 17:11:00	R0002690				Custom	0.8	1	160	6	5242	~ 29.590	~ 13.828	0.467	-	-	-	-	-	-	-	-	533.687	-	-	-	-	[mg HA/ccm]	-	-	-	-	-	-	-	-	-	-	-	-	-	-	-	-	-	-	-
Bitya_CBD2_12w_sh7	3763	6789	2017-04-25 17:11:00	R0002690				Custom	0.8	1	160	6	5242	~ 31.250	~ 14.584	0.466	-	-	-	-	-	-	-	-	544.634	-	-	-	-	[mg HA/ccm]	-	-	-	-	-	-	-	-	-	-	-	-	-	-	-	-	-	-	-
Bitya_CBD2_12w_sh8	3764	6790	2017-04-25 17:11:00	R0002690				Custom	0.8	1	160	6	5242	~ 31.906	~ 15.394	0.482	-	-	-	-	-	-	-	-	564.338	-	-	-	-	[mg HA/ccm]	-	-	-	-	-	-	-	-	-	-	-	-	-	-	-	-	-	-	-
Bitya_CBD2_12w_CBD1	3765	6791	2017-04-25 21:01:00	R0002691				Custom	0.8	1	160	6	5242	~ 32.199	~ 15.112	0.469	-	-	-	-	-	-	-	-	555.717	-	-	-	-	[mg HA/ccm]	-	-	-	-	-	-	-	-	-	-	-	-	-	-	-	-	-	-	-
Bitya_CBD2_12w_CBD2	3766	6792	2017-04-25 21:01:00	R0002691				Custom	0.8	1	160	6	5242	~ 34.743	~ 15.656	0.45	-	-	-	-	-	-	-	-	532.592	-	-	-	-	[mg HA/ccm]	-	-	-	-	-	-	-	-	-	-	-	-	-	-	-	-	-	-	-
Bitya_CBD2_12w_CBD3	3767	6793	2017-04-25 21:01:00	R0002691				Custom	0.8	1	160	6	5242	~ 32.497	~ 14.910	0.458	-	-	-	-	-	-	-	-	546.276	-	-	-	-	[mg HA/ccm]	-	-	-	-	-	-	-	-	-	-	-	-	-	-	-	-	-	-	-
Bitya_CBD2_12w_CBD4	3768	6794	2017-04-25 21:01:00	R0002691				Custom	0.8	1	160	6	5242	~ 36.023	~ 15.770	0.437	-	-	-	-	-	-	-	-	521.646	-	-	-	-	[mg HA/ccm]	-	-	-	-	-	-	-	-	-	-	-	-	-	-	-	-	-	-	-
Bitya_CBD2_12w_CBD5	3769	6795	2017-04-25 21:01:00	R0002691				Custom	0.8	1	160	6	5242	~ 31.139	~ 13.906	0.446	-	-	-	-	-	-	-	-	517.541	-	-	-	-	[mg HA/ccm]	-	-	-	-	-	-	-	-	-	-	-	-	-	-	-	-	-	-	-
Bitya_CBD2_12w_CBD6	3770	6796	2017-04-26 00:48:00	R0002692				Custom	0.8	1	160	6	5242	~ 33.270	~ 15.028	0.451	-	-	-	-	-	-	-	-	537.519	-	-	-	-	[mg HA/ccm]	-	-	-	-	-	-	-	-	-	-	-	-	-	-	-	-	-	-	-
Bitya_CBD2_12w_CBD7	3771	6797	2017-04-26 00:48:00	R0002692				Custom	0.8	1	160	6	5242	~ 32.975	~ 14.972	0.454	-	-	-	-	-	-	-	-	540.118	-	-	-	-	[mg HA/ccm]	-	-	-	-	-	-	-	-	-	-	-	-	-	-	-	-	-	-	-
Bitya_CBD2_12w_CBD8	3772	6798	2017-04-26 00:48:00	R0002692				Custom	0.8	1	160	6	5242	~ 31.557	~ 14.542	0.46	-	-	-	-	-	-	-	-	560.643	-	-	-	-	[mg HA/ccm]	-	-	-	-	-	-	-	-	-	-	-	-	-	-	-	-	-	-	-
Bitya_CBD2_12w_OVX_Veh1	3773	6799	2017-04-26 04:36:00	R0002693				Custom	0.8	1	160	6	5242	~ 33.044	~ 15.062	0.455	-	-	-	-	-	-	-	-	529.719	-	-	-	-	[mg HA/ccm]	-	-	-	-	-	-	-	-	-	-	-	-	-	-	-	-	-	-	-
Bitya_CBD2_12w_OVX_Veh2	3774	6800	2017-04-26 04:36:00	R0002693				Custom	0.8	1	160	6	5242	~ 30.784	~ 13.664	0.443	-	-	-	-	-	-	-	-	516.857	-	-	-	-	[mg HA/ccm]	-	-	-	-	-	-	-	-	-	-	-	-	-	-	-	-	-	-	-
Bitya_CBD2_12w_OVX_Veh3	3775	6801	2017-04-26 04:36:00	R0002693				Custom	0.8	1	160	6	5242	~ 35.252	~ 16.885	0.479	-	-	-	-	-	-	-	-	568.169	-	-	-	-	[mg HA/ccm]	-	-	-	-	-	-	-	-	-	-	-	-	-	-	-	-	-	-	-
Bitya_CBD2_12w_OVX_Veh4	3776	6802	2017-04-26 04:36:00	R0002693				Custom	0.8	1	160	6	5242	~ 30.264	~ 13.453	0.444	-	-	-	-	-	-	-	-	530.54	-	-	-	-	[mg HA/ccm]	-	-	-	-	-	-	-	-	-	-	-	-	-	-	-	-	-	-	-
Bitya_CBD2_12w_OVX_Veh5	3777	6803	2017-04-26 04:36:00	R0002693				Custom	0.8	1	160	6	5242	~ 31.267	~ 13.785	0.44	-	-	-	-	-	-	-	-	509.605	-	-	-	-	[mg HA/ccm]	-	-	-	-	-	-	-	-	-	-	-	-	-	-	-	-	-	-	-
Bitya_CBD2_12w_OVX_Veh6	3778	6804	2017-04-26 08:25:00	R0002694				Custom	0.8	1	160	6	5242	~ 32.504	~ 14.897	0.458	-	-	-	-	-	-	-	-	539.434	-	-	-	-	[mg HA/ccm]	-	-	-	-	-	-	-	-	-	-	-	-	-	-	-	-	-	-	-
Bitya_CBD2_12w_OVX_Veh7	3779	6805	2017-04-26 08:25:00	R0002694				Custom	0.8	1	160	6	5242	~ 34.010	~ 15.499	0.455	-	-	-	-	-	-	-	-	542.992	-	-	-	-	[mg HA/ccm]	-	-	-	-	-	-	-	-	-	-	-	-	-	-	-	-	-	-	-
Bitya_CBD2_12w_OVX_Veh8	3780	6806	2017-04-26 08:25:00	R0002694				Custom	0.8	1	160	6	5242	~ 32.682	~ 14.940	0.457	-	-	-	-	-	-	-	-	546.55	-	-	-	-	[mg HA/ccm]	-	-	-	-	-	-	-	-	-	-	-	-	-	-	-	-	-	-	-
[truncated: 20 more columns]

## Sheet: full rcc
SampName	SampNo	MeasNo	MeasDate	Filename	S-DOB	S-Remark	Meas-Rmk	Site	Sigma	Support	Threshold	Unit	Data-Threshold	VOX-TV	VOX-BV	VOX-BV/TV	Conn-Dens.	TRI-SMI	DT-Tb.N*	DT-Tb.Th*	DT-Tb.Sp*	DT-Tb.(1/N).SD*	DT-Tb.Th.SD*	DT-Tb.Sp.SD*	Mean1	Mean2	Mean3	Mean4	Mean5	Mean-Units	TRI-TV	TRI-BV	TRI-BV/TV	TRI-BS	TRI-BS/BV	TRI-Tb.N	TRI-Tb.Th	TRI-Tb.Sp	TRI-DA	TRI-|H1|	TRI-|H2|	TRI-|H3|	TRI-H1x	TRI-H1y	TRI-H1z	TRI-H2x	TRI-H2y	TRI-H2z	TRI-H3x
BITYA_OGPRCC_V_1784	2722	4922	2016-04-10 15:23:00	R0001919				Custom	0.8	2	160	6	5242	~ 4.872	~ 4.021	~ 0.825	-	-	-	-	-	-	-	-	967.206	-	-	-	-	[mg HA/ccm]	-	-	-	-	-	-	-	-	-	-	-	-	-	-	-	-	-	-	-
BITYA_OGPRCC_V_1758	2723	4923	2016-04-10 15:23:00	R0001919				Custom	0.8	2	160	6	5242	~ 9.372	~ 7.260	~ 0.774	-	-	-	-	-	-	-	-	894.914	-	-	-	-	[mg HA/ccm]	-	-	-	-	-	-	-	-	-	-	-	-	-	-	-	-	-	-	-
BITYA_OGPRCC_V_1_1	2724	4926	2016-04-10 15:23:00	R0001919				Custom	0.8	2	160	6	5242	~ 11.045	~ 8.299	~ 0.751	-	-	-	-	-	-	-	-	876.466	-	-	-	-	[mg HA/ccm]	-	-	-	-	-	-	-	-	-	-	-	-	-	-	-	-	-	-	-
BITYA_OGPRCC_V_1_2	2725	4927	2016-04-10 15:23:00	R0001919				Custom	0.8	2	160	6	5242	~ 10.554	~ 7.290	~ 0.690	-	-	-	-	-	-	-	-	789.415	-	-	-	-	[mg HA/ccm]	-	-	-	-	-	-	-	-	-	-	-	-	-	-	-	-	-	-	-
BITYA_OGPRCC_V_2_1	2726	4928	2016-04-10 15:23:00	R0001919				Custom	0.8	2	160	6	5242	~ 8.483	~ 6.025	~ 0.710	-	-	-	-	-	-	-	-	810.87	-	-	-	-	[mg HA/ccm]	-	-	-	-	-	-	-	-	-	-	-	-	-	-	-	-	-	-	-
BITYA_OGPRCC_V_2_2	2727	4929	2016-04-10 23:20:00	R0001920				Custom	0.8	2	160	6	5242	~ 6.472	~ 5.374	~ 0.830	-	-	-	-	-	-	-	-	986.201	-	-	-	-	[mg HA/ccm]	-	-	-	-	-	-	-	-	-	-	-	-	-	-	-	-	-	-	-
BITYA_OGPRCC_V_1785	2728	4930	2016-04-10 23:20:00	R0001920				Custom	0.8	2	160	6	5242	~ 8.819	~ 7.686	~ 0.871	-	-	-	-	-	-	-	-	1054.39	-	-	-	-	[mg HA/ccm]	-	-	-	-	-	-	-	-	-	-	-	-	-	-	-	-	-	-	-
BITYA_OGPRCC_V_1760	2729	4931	2016-04-10 23:20:00	R0001920				Custom	0.8	2	160	6	5242	~ 7.694	~ 5.104	~ 0.663	-	-	-	-	-	-	-	-	765.637	-	-	-	-	[mg HA/ccm]	-	-	-	-	-	-	-	-	-	-	-	-	-	-	-	-	-	-	-
BITYA_OGPRCC_10ng_1799	2730	4932	2016-04-10 23:20:00	R0001920				Custom	0.8	2	160	6	5242	~ 6.758	~ 5.643	~ 0.835	-	-	-	-	-	-	-	-	1033.62	-	-	-	-	[mg HA/ccm]	-	-	-	-	-	-	-	-	-	-	-	-	-	-	-	-	-	-	-
BITYA_OGPRCC_10ng_1779	2731	4933	2016-04-10 23:20:00	R0001920				Custom	0.8	2	160	6	5242	~ 6.592	~ 5.375	~ 0.815	-	-	-	-	-	-	-	-	969.392	-	-	-	-	[mg HA/ccm]	-	-	-	-	-	-	-	-	-	-	-	-	-	-	-	-	-	-	-
BITYA_OGPRCC_10ng_1783	2732	4934	2016-04-11 08:18:00	R0001921				Custom	0.8	2	160	6	5242	~ 5.464	~ 4.584	~ 0.838	-	-	-	-	-	-	-	-	1017.5	-	-	-	-	[mg HA/ccm]	-	-	-	-	-	-	-	-	-	-	-	-	-	-	-	-	-	-	-
BITYA_OGPRCC_10ng_1759	2733	4935	2016-04-11 08:18:00	R0001921				Custom	0.8	2	160	6	5242	~ 11.935	~ 8.891	~ 0.745	-	-	-	-	-	-	-	-	886.578	-	-	-	-	[mg HA/ccm]	-	-	-	-	-	-	-	-	-	-	-	-	-	-	-	-	-	-	-
BITYA_OGPRCC_10ng_1777	2734	4936	2016-04-11 08:18:00	R0001921				Custom	0.8	2	160	6	5242	~ 4.943	~ 4.100	~ 0.829	-	-	-	-	-	-	-	-	1008.89	-	-	-	-	[mg HA/ccm]	-	-	-	-	-	-	-	-	-	-	-	-	-	-	-	-	-	-	-
BITYA_OGPRCC_10ng_1793	2735	4937	2016-04-11 08:18:00	R0001921				Custom	0.8	2	160	6	5242	~ 9.639	~ 8.081	~ 0.838	-	-	-	-	-	-	-	-	1039.09	-	-	-	-	[mg HA/ccm]	-	-	-	-	-	-	-	-	-	-	-	-	-	-	-	-	-	-	-
BITYA_OGPRCC_10ng_1763	2736	4939	2016-04-11 08:18:00	R0001921				Custom	0.8	2	160	6	5242	~ 7.442	~ 5.270	~ 0.708	-	-	-	-	-	-	-	-	826.996	-	-	-	-	[mg HA/ccm]	-	-	-	-	-	-	-	-	-	-	-	-	-	-	-	-	-	-	-
BITYA_OGPRCC_10ng_cage4	2737	4940	2016-04-11 18:29:00	R0001922				Custom	0.8	2	160	6	5242	~ 9.232	~ 7.189	~ 0.778	-	-	-	-	-	-	-	-	935.228	-	-	-	-	[mg HA/ccm]	-	-	-	-	-	-	-	-	-	-	-	-	-	-	-	-	-	-	-
BITYA_OGPRCC_100ng_1726	2738	4941	2016-04-11 18:29:00	R0001922				Custom	0.8	2	160	6	5242	~ 5.071	~ 3.817	~ 0.752	-	-	-	-	-	-	-	-	905.027	-	-	-	-	[mg HA/ccm]	-	-	-	-	-	-	-	-	-	-	-	-	-	-	-	-	-	-	-
BITYA_OGPRCC_100ng_1797	2739	4942	2016-04-11 18:29:00	R0001922				Custom	0.8	2	160	6	5242	~ 6.441	~ 5.448	~ 0.845	-	-	-	-	-	-	-	-	1020.37	-	-	-	-	[mg HA/ccm]	-	-	-	-	-	-	-	-	-	-	-	-	-	-	-	-	-	-	-
BITYA_OGPRCC_100ng_1796	2740	4943	2016-04-11 18:29:00	R0001922				Custom	0.8	2	160	6	5242	~ 8.225	~ 6.615	~ 0.804	-	-	-	-	-	-	-	-	978.275	-	-	-	-	[mg HA/ccm]	-	-	-	-	-	-	-	-	-	-	-	-	-	-	-	-	-	-	-
BITYA_OGPRCC_100ng_1762	2741	4944	2016-04-11 18:29:00	R0001922				Custom	0.8	2	160	6	5242	~ 4.123	~ 3.344	~ 0.811	-	-	-	-	-	-	-	-	960.783	-	-	-	-	[mg HA/ccm]	-	-	-	-	-	-	-	-	-	-	-	-	-	-	-	-	-	-	-
BITYA_OGPRCC_100ng_1798	2742	4945	2016-04-12 02:51:00	R0001923				Custom	0.8	2	160	6	5242	~ 9.739	~ 8.289	~ 0.851	-	-	-	-	-	-	-	-	1069.15	-	-	-	-	[mg HA/ccm]	-	-	-	-	-	-	-	-	-	-	-	-	-	-	-	-	-	-	-
BITYA_OGPRCC_100ng_1792	2743	4946	2016-04-12 02:51:00	R0001923				Custom	0.8	2	160	6	5242	~ 6.677	~ 5.543	~ 0.830	-	-	-	-	-	-	-	-	1024.33	-	-	-	-	[mg HA/ccm]	-	-	-	-	-	-	-	-	-	-	-	-	-	-	-	-	-	-	-
BITYA_OGPRCC_100ng_1755	2744	4947	2016-04-12 02:51:00	R0001923				Custom	0.8	2	160	6	5242	~ 11.998	~ 9.169	~ 0.764	-	-	-	-	-	-	-	-	953.95	-	-	-	-	[mg HA/ccm]	-	-	-	-	-	-	-	-	-	-	-	-	-	-	-	-	-	-	-
BITYA_OGPRCC_100ng_1795	2745	4948	2016-04-12 02:51:00	R0001923				Custom	0.8	2	160	6	5242	~ 6.963	~ 5.062	~ 0.727	-	-	-	-	-	-	-	-	876.192	-	-	-	-	[mg HA/ccm]	-	-	-	-	-	-	-	-	-	-	-	-	-	-	-	-	-	-	-
[truncated: 20 more columns]

## Sheet: MOI
Patient-Name	S-No	M-No	ListDate	Segmentation	El_size_mm	CMx[mm]	CMy[mm]	Ixx[mm^4]	Iyy[mm^4]	Ixy[mm^4]	pMOI[mm^4]	Ixx/Cy[mm^3]	Iyy/Cx[mm^3]	Imax[mm^4]	Imin[mm^4]	Angle[deg]	Imax/Cmax[mm^3]	Imin/Cmin[mm^3]	BArea[mm^2]	TArea[mm^2]	BA/TA[1]	TRI-Ct.Th	Mean1	Mean1SD	Mean2	Mean2SD	DT-Ct.Th+	DT-Ct.Th.SD	DT-Ct.Sp+	DT-Ct.Sp.SD
BITYA_OGPRCC_V_1784	2722	4922	2017-08-15 14:51:00	0.80 / 1 / 224.000000	0.0100 0.0100 0.0100	3.56544	1.15437	0.08853	0.16385	0.00742	0.25237	0.14469	0.18346	0.16468	0.0877	-5.69891	0.18394	0.14435	0.6319	1.51721	0.41649	matched	543.569	611.403	~	+-	0.1623	0.0317	!	:
BITYA_OGPRCC_V_1758	2723	4923	2017-08-15 15:10:00	0.80 / 1 / 224.000000	0.0100 0.0100 0.0100	2.66325	3.07741	0.17839	0.15222	-0.04945	0.3306	0.20392	0.19256	0.21657	0.11403	52.402	0.21302	0.18221	0.68384	1.79026	0.38198	matched	505.032	583.115	~	+-	0.1514	0.0196	!	:
BITYA_OGPRCC_V_1_1	2724	4926	2017-08-15 16:54:00	0.80 / 1 / 224.000000	0.0100 0.0100 0.0100	2.80626	2.83433	0.15248	0.09425	-0.01565	0.24673	0.17916	0.1474	0.15653	0.09019	75.8229	0.18244	0.14967	0.62878	1.51185	0.4159	matched	560.925	608.807	~	+-	0.1588	0.0258	!	:
BITYA_OGPRCC_V_1_2	2725	4927	2017-08-15 17:09:00	0.80 / 1 / 224.000000	0.0100 0.0100 0.0100	2.15322	1.48247	0.14102	0.11373	0.03233	0.25475	0.18604	0.17109	0.16253	0.09222	-56.5245	0.18777	0.15088	0.64474	1.51965	0.42427	matched	559.148	604.981	~	+-	0.1603	0.0179	!	:
BITYA_OGPRCC_V_2_1	2726	4962	2017-08-15 17:24:00	0.80 / 1 / 224.000000	0.0100 0.0100 0.0100	2.36642	1.76486	0.09342	0.15676	-0.01621	0.25018	0.15701	0.18713	0.16072	0.08947	13.476	0.18476	0.15282	0.6248	1.52205	0.4105	matched	548.216	595.278	~	+-	0.1536	0.0158	!	:
BITYA_OGPRCC_V_2_2	2727	4929	2017-08-15 17:40:00	0.80 / 1 / 224.000000	0.0100 0.0100 0.0100	2.69602	1.43379	0.09045	0.17446	-0.01397	0.26491	0.15632	0.18853	0.17687	0.08804	9.15084	0.18825	0.15192	0.67136	1.49919	0.44781	matched	618.594	632.039	~	+-	0.1689	0.0235	!	:
BITYA_OGPRCC_V_1785	2728	4930	2017-08-15 17:56:00	0.80 / 1 / 224.000000	0.0100 0.0100 0.0100	2.44602	2.56112	0.12559	0.11737	-0.03495	0.24296	0.16839	0.17089	0.15672	0.08624	48.251	0.17693	0.14673	0.62462	1.49062	0.41904	matched	579.51	629.169	~	+-	0.1589	0.0249	!	:
BITYA_OGPRCC_V_1760	2729	4931	2017-08-15 18:11:00	0.80 / 1 / 224.000000	0.0100 0.0100 0.0100	1.36091	1.78116	0.12161	0.18239	0.03205	0.304	0.18361	0.21996	0.19635	0.10766	-23.2028	0.21111	0.17431	0.69453	1.6721	0.41536	matched	584.976	635.455	~	+-	0.1657	0.0221	!	:
BITYA_OGPRCC_10NG_1799	2730	4932	2017-08-15 18:23:00	0.80 / 1 / 224.000000	0.0100 0.0100 0.0100	2.79238	1.82623	0.11284	0.18743	-0.0339	0.30027	0.17648	0.21236	0.20064	0.09963	21.1194	0.21211	0.16318	0.69372	1.63602	0.42403	matched	602.058	637.641	~	+-	0.1675	0.0257	!	:
BITYA_OGPRCC_10NG_1779	2731	4933	2017-08-15 18:39:00	0.80 / 1 / 224.000000	0.0100 0.0100 0.0100	1.87278	1.24153	0.10847	0.18691	-0.01934	0.29539	0.16836	0.20049	0.1916	0.10379	13.1472	0.20347	0.16707	0.68674	1.64596	0.41723	matched	576.777	625.069	~	+-	0.1644	0.0254	!	:
BITYA_OGPRCC_10NG_1783	2732	4934	2017-08-15 18:51:00	0.80 / 1 / 224.000000	0.0100 0.0100 0.0100	2.36488	1.07255	0.13376	0.16525	0.04095	0.29901	0.18497	0.20167	0.19344	0.10557	-34.4871	0.21269	0.16908	0.70079	1.63332	0.42906	matched	594.406	630.399	~	+-	0.1669	0.0177	!	:
BITYA_OGPRCC_10NG_1759	2733	4935	2017-08-15 19:08:00	0.80 / 1 / 224.000000	0.0100 0.0100 0.0100	2.77181	2.10003	0.12663	0.21362	-0.04729	0.34026	0.19151	0.22785	0.23445	0.1058	23.6587	0.22763	0.1727	0.6958	1.7757	0.39185	matched	539.06	616.323	~	+-	0.1568	0.0235	!	:
BITYA_OGPRCC_10NG_1777	2734	4936	2017-08-15 19:17:00	0.80 / 1 / 224.000000	0.0100 0.0100 0.0100	1.85874	1.04558	0.12471	0.12832	0.03853	0.25302	0.1773	0.16911	0.16521	0.08781	-43.6343	0.1818	0.14707	0.63124	1.52152	0.41487	matched	587.026	633.542	~	+-	0.1566	0.0247	!	:
BITYA_OGPRCC_10NG_1793	2735	4938	2017-08-15 19:35:00	0.80 / 1 / 224.000000	0.0100 0.0100 0.0100	3.04745	2.56322	0.11334	0.13917	-0.02702	0.25251	0.16603	0.18411	0.15638	0.09613	32.1246	0.18422	0.15358	0.63824	1.5363	0.41544	matched	593.996	641.878	~	+-	0.1589	0.0208	!	:
BITYA_OGPRCC_10NG_1763	2736	4939	2017-08-15 19:49:00	0.80 / 1 / 224.000000	0.0100 0.0100 0.0100	2.87331	1.40706	0.09154	0.14315	-0.00481	0.23469	0.14984	0.17081	0.14378	0.09091	5.06379	0.17062	0.14772	0.62062	1.47316	0.42128	matched	586.889	627.802	~	+-	0.1584	0.0208	!	:
BITYA_OGPRCC_10NG_CAGE4	2737	4940	2017-08-15 20:06:00	0.80 / 1 / 224.000000	0.0100 0.0100 0.0100	2.5442	2.7762	0.11616	0.11973	-0.0323	0.2359	0.15961	0.16235	0.1504	0.08549	43.4602	0.16871	0.14677	0.61417	1.47185	0.41728	matched	575.137	622.883	~	+-	0.1515	0.0165	!	:
BITYA_OGPRCC_100NG_1726	2738	4941	2017-08-15 20:17:00	0.80 / 1 / 224.000000	0.0100 0.0100 0.0100	2.83924	0.94835	0.09523	0.15398	0.017	0.24921	0.14897	0.17863	0.15873	0.09048	-15.081	0.18105	0.14653	0.65155	1.48423	0.43898	matched	628.16	649.941	~	+-	0.1662	0.0229	!	:
BITYA_OGPRCC_100NG_1797	2739	4942	2017-08-15 20:32:00	0.80 / 1 / 224.000000	0.0100 0.0100 0.0100	1.89594	2.79344	0.15775	0.11203	0.03032	0.26978	0.1976	0.16824	0.17306	0.09672	-63.5334	0.19408	0.15661	0.64576	1.59093	0.4059	matched	575.957	639.965	~	+-	0.158	0.0256	!	:
BITYA_OGPRCC_100NG_1796	2740	4943	2017-08-15 20:50:00	0.80 / 1 / 224.000000	0.0100 0.0100 0.0100	2.57824	3.33247	0.15715	0.11086	-0.01966	0.268	0.18103	0.1578	0.16463	0.10337	69.7308	0.18385	0.16304	0.6516	1.58905	0.41006	matched	582.516	642.425	~	+-	0.1578	0.0235	!	:
BITYA_OGPRCC_100NG_1762	2741	4944	2017-08-15 21:01:00	0.80 / 1 / 224.000000	0.0100 0.0100 0.0100	2.65527	2.35008	0.11302	0.11741	-0.03322	0.23042	0.16029	0.16645	0.14858	0.08184	43.0975	0.17072	0.13752	0.59522	1.47157	0.40448	matched	556.005	619.876	~	+-	0.1514	0.0231	!	:
BITYA_OGPRCC_100NG_1798	2742	4945	2017-08-15 21:18:00	0.80 / 1 / 224.000000	0.0100 0.0100 0.0100	2.47804	3.05379	0.16799	0.13691	-0.04738	0.3049	0.19911	0.18981	0.20236	0.10254	54.0602	0.20878	0.16767	0.70304	1.64869	0.42643	matched	611.761	654.04	~	+-	0.1708	0.03	!	:
BITYA_OGPRCC_100NG_1792	2743	4946	2017-08-15 21:34:00	0.80 / 1 / 224.000000	0.0100 0.0100 0.0100	2.88909	0.91497	0.11023	0.15879	0.03583	0.26902	0.16333	0.18962	0.17793	0.09109	-27.9516	0.2009	0.15634	0.68375	1.51866	0.45024	matched	654.808	657.183	~	+-	0.1709	0.0211	!	:
BITYA_OGPRCC_100NG_1755	2744	4947	2017-08-15 21:51:00	0.80 / 1 / 224.000000	0.0100 0.0100 0.0100	2.63391	2.16617	0.10499	0.15858	-0.02808	0.26356	0.16693	0.19076	0.17067	0.0929	23.1585	0.19012	0.1566	0.66399	1.5315	0.43355	matched	628.707	655.27	~	+-	0.1667	0.0224	!	:
BITYA_OGPRCC_100NG_1795	2745	4961	2017-08-15 22:08:00	0.80 / 1 / 224.000000	0.0100 0.0100 0.0100	1.95158	1.12847	0.1347	0.15989	-0.04096	0.29459	0.18516	0.19919	0.19028	0.10431	36.5398	0.21316	0.17352	0.71922	1.59851	0.44993	matched	647.565	655.407	~	+-	0.1759	0.0237	!	:
BITYA_OVX_CBD_1	3113	5879	2016-11-29 01:53:00	0.80 / 1 / 224.000000	0.0100 0.0100 0.0100	3.0046	2.46656	0.20514	0.13073	-0.02931	0.33587	0.22493	0.19414	0.21555	0.12032	70.7734	0.22977	0.18289	0.76626	1.70612	0.44912	matched	544.811	564.365	~	+-	0.1838	0.0259	0	0
BITYA_OVX_CBD_2	3114	5880	2016-11-29 02:10:00	0.80 / 1 / 224.000000	0.0100 0.0100 0.0100	2.74232	3.34072	0.17665	0.11777	-0.02943	0.29443	0.20006	0.17912	0.189	0.10543	67.5283	0.20744	0.17153	0.70174	1.62053	0.43303	matched	522.752	560.768	~	+-	0.1701	0.0217	!	:
BITYA_OVX_CBD_3	3115	5881	2016-11-29 02:43:00	0.80 / 1 / 224.000000	0.0100 0.0100 0.0100	2.68158	2.82444	0.20743	0.11128	0.0046	0.31871	0.21639	0.17602	0.20779	0.11092	-87.2829	0.21556	0.17505	0.7007	1.7228	0.40672	matched	492.645	554.235	~	+-	0.1599	0.0245	!	:
BITYA_OVX_CBD_4	3116	5882	2016-11-29 03:00:00	0.80 / 1 / 224.000000	0.0100 0.0100 0.0100	3.00296	1.4851	0.11471	0.19404	0.02628	0.30875	0.17444	0.20558	0.20213	0.10663	-16.7643	0.21128	0.17702	0.70601	1.6653	0.42395	matched	525.213	567.679	~	+-	0.1669	0.0223	!	:
BITYA_OVX_CBD_5	3117	5883	2016-11-29 03:16:00	0.80 / 1 / 224.000000	0.0100 0.0100 0.0100	1.46032	2.0217	0.11476	0.15968	-0.02874	0.27444	0.17995	0.1996	0.17381	0.10064	25.9896	0.19866	0.16371	0.68399	1.55965	0.43855	matched	535.344	565.501	~	+-	0.1668	0.0185	0	0
BITYA_OVX_CBD_6	3118	6051	2016-11-29 03:28:00	0.80 / 1 / 224.000000	0.0100 0.0100 0.0100	2.54041	2.09861	0.10158	0.15692	-0.02028	0.2585	0.16593	0.19185	0.16363	0.09487	18.1099	0.18984	0.15961	0.68497	1.49289	0.45882	matched	574.256	583.774	~	+-	0.175	0.023	!	:
BITYA_OVX_CBD_7	3119	6052	2016-11-29 03:49:00	0.80 / 1 / 224.000000	0.0100 0.0100 0.0100	2.04611	1.59686	0.19767	0.12864	-0.0331	0.3263	0.2293	0.19542	0.21106	0.11524	68.0838	0.22436	0.18404	0.72977	1.71499	0.42552	matched	534.965	575.632	~	+-	0.1701	0.0171	!	:
OVX_6WK_1	3076	5670	2016-11-29 03:58:00	0.80 / 1 / 224.000000	0.0100 0.0100 0.0100	1.41074	2.67757	0.1261	0.11959	0.03456	0.24568	0.16913	0.15782	0.15764	0.08805	-47.6461	0.17591	0.14236	0.59116	1.56103	0.3787	matched	527.119	595.223	~	+-	0.1431	0.023	!	:
OVX_6WK_2	3077	5671	2016-12-19 12:45:00	0.80 / 1 / 224.000000	0.0100 0.0100 0.0100	2.4568	2.29489	0.10678	0.13965	-0.03286	0.24643	0.16019	0.17914	0.16002	0.08641	31.7233	0.17526	0.14345	0.60309	1.53432	0.39307	matched	540.666	606.033	~	+-	0.1508	0.0273	!	:
BITYA_OVX_6WK_3	3078	5908	2016-12-19 13:04:00	0.80 / 1 / 224.000000	0.0100 0.0100 0.0100	3.41531	0.90332	0.09682	0.1437	0.02322	0.24052	0.15179	0.17041	0.15336	0.08716	-22.3319	0.17896	0.1441	0.59322	1.52937	0.38789	matched	538.887	602.065	~	+-	0.1463	0.0193	!	:
BITYA_OVX_6WK_4	3079	5909	2016-12-19 13:21:00	0.80 / 1 / 224.000000	0.0100 0.0100 0.0100	2.30083	2.48049	0.11353	0.13194	-0.03893	0.24547	0.16076	0.17455	0.16283	0.08265	38.3719	0.17666	0.14171	0.5908	1.53738	0.38429	matched	537.929	602.749	~	+-	0.1449	0.0213	!	:
BITYA_OVX_6WK_5	3080	6152	2016-12-19 15:10:00	0.80 / 1 / 224.000000	0.0100 0.0100 0.0100	2.05005	1.27147	0.09197	0.14399	-0.01683	0.23596	0.14402	0.16982	0.14899	0.08697	16.4188	0.17606	0.14102	0.59279	1.51956	0.39011	matched	535.877	593.034	~	+-	0.1469	0.023	!	:
OVX_6WK_6	3081	5650	2016-12-19 13:38:00	0.80 / 1 / 224.000000	0.0100 0.0100 0.0100	3.19052	1.20382	0.08578	0.15392	0.00203	0.2397	0.1419	0.17271	0.15402	0.08569	-1.7259	0.1728	0.14217	0.56761	1.55776	0.36437	matched	505.5	587.971	~	+-	0.1374	0.0181	!	:
BITYA_OVX_6WK_7	3082	5691	2016-12-19 13:50:00	0.80 / 1 / 224.000000	0.0100 0.0100 0.0100	1.58721	1.29695	0.10057	0.15918	-0.00972	0.25976	0.15924	0.1836	0.16082	0.09893	9.23442	0.18594	0.16012	0.63246	1.57774	0.40086	matched	563.38	608.496	~	+-	0.1542	0.0211	!	:
BITYA_SHAM_6WK_1	3083	5692	2016-12-19 14:06:00	0.80 / 1 / 224.000000	0.0100 0.0100 0.0100	3.31382	0.82147	0.1015	0.17627	0.01988	0.27778	0.15847	0.2018	0.18135	0.09642	-13.9983	0.20391	0.15324	0.67647	1.56888	0.43118	matched	608.398	618.075	~	+-	0.1665	0.019	!	:
BITYA_SHAM_6WK_2	3084	5693	2016-12-19 14:16:00	0.80 / 1 / 224.000000	0.0100 0.0100 0.0100	2.61901	1.67666	0.09331	0.16417	-0.02485	0.25748	0.15158	0.19124	0.17203	0.08545	17.5351	0.19061	0.14195	0.61032	1.55801	0.39173	matched	548.602	600.971	~	+-	0.1492	0.0207	!	:
BITYA_SHAM_6WK_3	3085	5694	2016-12-19 14:37:00	0.80 / 1 / 224.000000	0.0100 0.0100 0.0100	2.41959	1.47442	0.08723	0.14322	-0.0111	0.23045	0.14228	0.16719	0.14539	0.08506	10.8054	0.16487	0.14028	0.55725	1.53896	0.36209	matched	503.173	581.814	~	+-	0.1357	0.0179	!	:
BITYA_SHAM_6WK_4	3086	5695	2016-12-19 14:53:00	0.80 / 1 / 224.000000	0.0100 0.0100 0.0100	2.84872	1.40314	0.10113	0.17575	-0.00795	0.27689	0.16233	0.2026	0.17664	0.10025	5.99391	0.20137	0.16179	0.66159	1.60043	0.41339	matched	585.684	618.212	~	+-	0.1615	0.0193	!	:
BITYA_SHAM_12WK_1	3120	6053	2016-12-12 15:09:00	0.80 / 1 / 224.000000	0.0100 0.0100 0.0100	2.55562	2.93478	0.20589	0.12481	0.01074	0.3307	0.23177	0.19381	0.20755	0.12314	-82.6575	0.23018	0.19188	0.8096	1.65796	0.48831	matched	636.553	607.822	~	+-	0.2056	0.0387	0	0
BITYA_SHAM_12WK_2	3121	6054	2016-12-12 15:21:00	0.80 / 1 / 224.000000	0.0100 0.0100 0.0100	1.52756	1.46633	0.18305	0.11537	0.01829	0.29842	0.21993	0.17893	0.18775	0.11067	-75.8409	0.21545	0.1713	0.74165	1.59502	0.46498	matched	601.238	599.206	~	+-	0.1866	0.0275	!	:
BITYA_SHAM_12WK_3	3122	6055	2016-12-22 14:12:00	0.80 / 1 / 224.000000	0.0100 0.0100 0.0100	2.43375	2.15467	0.13312	0.18939	-0.04008	0.32251	0.19964	0.22738	0.21028	0.11223	27.4417	0.22779	0.18159	0.77395	1.63895	0.47222	matched	610.611	597.028	~	+-	0.1904	0.0252	!	:
BITYA_SHAM_12WK_4	3123	5884	2016-12-12 15:37:00	0.80 / 1 / 224.000000	0.0100 0.0100 0.0100	2.48438	1.60379	0.13137	0.22718	-0.02329	0.35856	0.20456	0.25076	0.23271	0.12585	12.9307	0.24897	0.19809	0.82236	1.7237	0.47709	matched	609.38	594.946	~	+-	0.1971	0.0254	!	:
BITYA_SHAM_12WK_5	3124	5885	2016-12-12 15:57:00	0.80 / 1 / 224.000000	0.0100 0.0100 0.0100	2.60137	3.43347	0.21968	0.16647	-0.04762	0.38615	0.25199	0.22813	0.24777	0.13838	59.6004	0.26087	0.21378	0.86238	1.79001	0.48177	matched	617.333	599.111	~	+-	0.2063	0.03	0	0
BITYA_SHAM_12WK_6	3125	5886	2016-12-12 16:13:00	0.80 / 1 / 224.000000	0.0100 0.0100 0.0100	2.13053	1.44063	0.17147	0.12095	0.03275	0.29242	0.22023	0.19026	0.18772	0.1047	-63.7375	0.22101	0.17441	0.77092	1.53285	0.50293	matched	659.086	608.579	~	+-	0.1963	0.0171	0	0
BITYA_SHAM_12WK_7	3126	5887	2016-12-12 16:29:00	0.80 / 1 / 224.000000	0.0100 0.0100 0.0100	2.37046	2.43536	0.14137	0.15813	-0.04474	0.2995	0.19184	0.21203	0.19537	0.10413	39.674	0.21868	0.16863	0.74207	1.58981	0.46677	matched	608.434	603.183	~	+-	0.1876	0.0312	0	0
BITYA_SHAM_12WK_8	3127	5888	2016-12-12 16:47:00	0.80 / 1 / 224.000000	0.0100 0.0100 0.0100	1.97151	1.93151	0.14912	0.23621	0.04375	0.38532	0.21437	0.26121	0.2544	0.13092	-22.5818	0.27085	0.20379	0.86442	1.76256	0.49044	matched	614.493	587.655	~	+-	0.2053	0.0285	!	:
BITYA_SHAM_12WK_9	3128	5889	2016-12-12 17:05:00	0.80 / 1 / 224.000000	0.0100 0.0100 0.0100	2.93582	1.17823	0.18346	0.16765	0.06078	0.35111	0.23557	0.22264	0.2369	0.1142	-48.6746	0.24543	0.18851	0.80454	1.70073	0.47306	matched	605.688	598.638	~	+-	0.1912	0.0277	0	0
BITYA_SHAM_12WK_10	3129	5890	2016-12-12 17:23:00	0.80 / 1 / 224.000000	0.0100 0.0100 0.0100	3.31424	1.31555	0.14112	0.25085	0.01533	0.39197	0.21147	0.26815	0.25301	0.13896	-7.82038	0.26883	0.21195	0.86545	1.80805	0.47867	matched	615.818	604.603	~	+-	0.207	0.0324	0	0
BITYA_12WOVX_CB2KO_1OGP1	3682	6586	2017-04-23 21:46:00	0.80 / 1 / 224.000000	0.0100 0.0100 0.0100	3.67805	1.39284	0.159	0.29561	0.02473	0.45461	0.21864	0.28058	0.30011	0.1545	-9.98586	0.2848	0.22255	0.78122	2.13178	0.36646	matched	471.428	639.694	~	+-	0.1595	0.0192	!	:
BITYA_12WOVX_CB2KO_1OGP2	3683	6587	2017-04-23 22:04:00	0.80 / 1 / 224.000000	0.0100 0.0100 0.0100	2.61937	2.09679	0.14675	0.23246	-0.04033	0.3792	0.21863	0.26072	0.24855	0.13066	21.6802	0.25498	0.20247	0.7669	1.86562	0.41107	matched	569.948	649.683	~	+-	0.1722	0.0213	0	0
BITYA_12WOVX_CB2KO_1OGP3	3684	6588	2017-04-23 22:21:00	0.80 / 1 / 224.000000	0.0100 0.0100 0.0100	2.72864	1.15424	0.16771	0.34298	-0.02484	0.51069	0.25287	0.32629	0.34648	0.1642	7.93372	0.32416	0.23822	0.8937	2.12205	0.42115	matched	585	654.883	~	+-	0.1886	0.0251	0.01	0
BITYA_12WOVX_CB2KO_1OGP4	3685	6589	2017-04-23 22:40:00	0.80 / 1 / 224.000000	0.0100 0.0100 0.0100	2.74696	1.3422	0.21222	0.24703	0.06312	0.45925	0.25538	0.26208	0.29532	0.16393	-37.2964	0.28172	0.22924	0.79127	2.15149	0.36778	matched	509.741	617.664	~	+-	0.161	0.0195	!	:
BITYA_12WOVX_CB2KO_1OGP6	3686	6590	2017-04-23 22:57:00	0.80 / 1 / 224.000000	0.0100 0.0100 0.0100	2.60668	1.24163	0.11252	0.19554	0.00927	0.30806	0.16799	0.20874	0.19669	0.11137	-6.41229	0.21033	0.17021	0.65316	1.75322	0.37255	matched	512.889	620.674	~	+-	0.1493	0.0211	!	:
BITYA_12WOVX_CB2KO_2OGP1	3687	6591	2017-04-23 23:18:00	0.80 / 1 / 224.000000	0.0100 0.0100 0.0100	3.14935	1.74262	0.15526	0.28748	-0.01746	0.44274	0.22927	0.27661	0.2899	0.15284	7.38115	0.27539	0.22342	0.81639	2.03589	0.401	matched	530.677	648.725	~	+-	0.1738	0.0216	!	:
BITYA_12WOVX_CB2KO_2OGP3	3688	6592	2017-04-23 23:38:00	0.80 / 1 / 224.000000	0.0100 0.0100 0.0100	3.07451	2.16687	0.21035	0.30518	-0.07207	0.51553	0.27715	0.32281	0.34419	0.17134	28.2641	0.31735	0.24276	0.88204	2.16496	0.40742	matched	573.232	642.568	~	+-	0.1817	0.0243	!	:
BITYA_12WOVX_CB2KO_2OGP5	3689	6593	2017-04-23 23:57:00	0.80 / 1 / 224.000000	0.0100 0.0100 0.0100	3.1705	1.2301	0.15416	0.27311	0.01439	0.42728	0.2179	0.27133	0.27504	0.15224	-6.72724	0.27371	0.21914	0.82153	1.97564	0.41583	matched	585.41	638.463	~	+-	0.1798	0.0195	!	:
BITYA_12WOVX_CB2KO_2OGP6	3690	6594	2017-04-24 00:18:00	0.80 / 1 / 224.000000	0.0100 0.0100 0.0100	1.6214	2.05206	0.18212	0.26077	0.03958	0.44289	0.24541	0.27309	0.27736	0.16552	-22.6411	0.26854	0.23215	0.80166	2.09535	0.38259	matched	540.529	639.694	~	+-	0.1692	0.0251	0	0
BITYA_12WOVX_CB2KO_2OGP7	3691	6595	2017-04-24 00:34:00	0.80 / 1 / 224.000000	0.0100 0.0100 0.0100	1.37504	1.56324	0.1396	0.2331	0.02376	0.37271	0.21219	0.25695	0.23899	0.13372	-13.5163	0.25202	0.20719	0.7993	1.81269	0.44095	matched	619.345	644.62	~	+-	0.185	0.0209	!	:
BITYA_12WOVX_CB2KO_3C1	3692	6596	2017-04-24 00:53:00	0.80 / 1 / 224.000000	0.0100 0.0100 0.0100	2.64165	2.45015	0.22811	0.28514	-0.08738	0.51325	0.28449	0.30753	0.34862	0.16462	35.9498	0.32389	0.23987	0.90662	2.11634	0.42839	matched	590.61	631.758	~	+-	0.1899	0.0222	!	:
BITYA_12WOVX_CB2KO_3C2	3693	6597	2017-04-24 01:13:00	0.80 / 1 / 224.000000	0.0100 0.0100 0.0100	1.69806	1.45795	0.16346	0.26345	-0.02577	0.42692	0.22858	0.27005	0.26979	0.15713	13.6591	0.27589	0.22654	0.82113	2.00014	0.41054	matched	573.095	637.368	~	+-	0.1802	0.0258	!	:
BITYA_12WOVX_CB2KO_3C3	3694	6598	2017-04-24 01:31:00	0.80 / 1 / 224.000000	0.0100 0.0100 0.0100	1.90201	1.24483	0.15392	0.26541	0.00904	0.41934	0.22589	0.2755	0.26628	0.15306	-4.58645	0.27357	0.22518	0.83186	1.95426	0.42566	matched	597.178	640.105	~	+-	0.1848	0.0255	!	:
BITYA_12WOVX_CB2KO_3C4	3695	6599	2017-04-24 01:51:00	0.80 / 1 / 224.000000	0.0100 0.0100 0.0100	3.18111	1.56244	0.15311	0.25918	0.00429	0.41229	0.22388	0.2654	0.25945	0.15284	-2.30176	0.26559	0.22626	0.82393	1.93994	0.42472	matched	600.599	642.841	~	+-	0.1843	0.0234	!	:
BITYA_12WOVX_CB2KO_3C5	3696	6600	2017-04-24 02:23:00	0.80 / 1 / 224.000000	0.0100 0.0100 0.0100	2.52809	1.54191	0.1325	0.23468	-0.01778	0.36718	0.20222	0.2464	0.23774	0.12944	9.64254	0.24302	0.19736	0.75472	1.83587	0.41109	matched	571.453	632.168	~	+-	0.1713	0.0223	!	:
BITYA_12WOVX_CB2KO_4C1	3697	6601	2017-04-24 02:42:00	0.80 / 1 / 224.000000	0.0100 0.0100 0.0100	1.62908	1.83133	0.18341	0.31067	0.03644	0.49408	0.2636	0.31747	0.32052	0.17357	-14.9316	0.3117	0.24703	0.91428	2.08182	0.43917	matched	607.987	635.179	~	+-	0.1966	0.0205	!	:
BITYA_12WOVX_CB2KO_4C2	3698	6602	2017-04-24 03:01:00	0.80 / 1 / 224.000000	0.0100 0.0100 0.0100	1.39194	1.49606	0.12734	0.23518	-0.0148	0.36253	0.19403	0.24304	0.23722	0.1253	7.65759	0.24591	0.19757	0.7865	1.77048	0.44423	matched	624.955	643.252	~	+-	0.183	0.0224	!	:
BITYA_12WOVX_CB2KO_4C3	3699	6603	2017-04-24 03:37:00	0.80 / 1 / 224.000000	0.0100 0.0100 0.0100	2.26209	1.5032	0.1692	0.32585	-0.02081	0.49505	0.23911	0.29481	0.32873	0.16633	7.39489	0.29925	0.23685	0.85154	2.17024	0.39237	matched	545.044	624.916	~	+-	0.1757	0.0277	!	:
BITYA_12WOVX_CB2KO_4C4	3700	6604	2017-04-24 04:10:00	0.80 / 1 / 224.000000	0.0100 0.0100 0.0100	2.88266	2.12443	0.18972	0.32186	-0.04384	0.51158	0.26466	0.32004	0.33531	0.17627	16.8835	0.31607	0.25266	0.91567	2.13052	0.42979	matched	606.209	641.747	~	+-	0.194	0.0232	!	:
BITYA_12WOVX_CB2KO_4C5	3701	6605	2017-04-24 04:40:00	0.80 / 1 / 224.000000	0.0100 0.0100 0.0100	1.53674	2.57284	0.20311	0.28589	0.06743	0.489	0.27138	0.3031	0.32364	0.16536	-29.232	0.29889	0.23741	0.84831	2.13651	0.39705	matched	537.245	615.064	~	+-	0.1777	0.0256	!	:
BITYA_12WSHAM_CB2KO_1C1	3702	6606	2017-04-24 05:00:00	0.80 / 1 / 224.000000	0.0100 0.0100 0.0100	2.58266	2.39813	0.24975	0.3731	-0.08439	0.62285	0.31083	0.37067	0.41605	0.2068	26.9572	0.37575	0.28552	1.00986	2.34287	0.43103	matched	592.525	633.537	~	+-	0.2036	0.0261	!	:
BITYA_12WSHAM_CB2KO_1C2	3703	6607	2017-04-24 05:20:00	0.80 / 1 / 224.000000	0.0100 0.0100 0.0100	1.41031	1.86835	0.17365	0.28422	0.02416	0.45787	0.24427	0.2995	0.28934	0.16854	-11.8751	0.29471	0.23815	0.84774	2.06647	0.41024	matched	560.78	620.401	~	+-	0.1828	0.0202	!	:
BITYA_12WSHAM_CB2KO_1C3	3704	6608	2017-04-24 05:40:00	0.80 / 1 / 224.000000	0.0100 0.0100 0.0100	1.54437	2.49228	0.25043	0.30224	0.10466	0.55266	0.30418	0.338	0.38423	0.16844	-38.117	0.34969	0.25061	0.97231	2.13597	0.45521	matched	642.606	646.125	~	+-	0.2051	0.0271	!	:
BITYA_12WSHAM_CB2KO_1C4	3705	6609	2017-04-24 05:59:00	0.80 / 1 / 224.000000	0.0100 0.0100 0.0100	2.72545	2.15898	0.19858	0.31344	-0.06751	0.51202	0.27599	0.32898	0.34477	0.16726	24.8669	0.32993	0.24918	0.94345	2.07377	0.45494	matched	644.933	648.178	~	+-	0.2034	0.0223	0.0373	0.0049
BITYA_12WSHAM_CB2KO_1C5	3706	6610	2017-04-24 06:18:00	0.80 / 1 / 224.000000	0.0100 0.0100 0.0100	2.57322	1.61938	0.18538	0.34541	-0.02839	0.53079	0.25993	0.33825	0.35052	0.18027	9.80823	0.33308	0.25812	0.92592	2.17573	0.42557	matched	588.831	627.243	~	+-	0.1938	0.0224	0	0
BITYA_12WSHAM_CB2KO_2C1	3707	6613	2017-04-24 06:50:00	0.80 / 1 / 224.000000	0.0100 0.0100 0.0100	1.96729	1.34748	0.18388	0.34102	-0.06454	0.5249	0.24966	0.32965	0.36419	0.16072	19.6569	0.34399	0.23872	0.94814	2.07709	0.45648	matched	622.355	630.937	~	+-	0.2019	0.0267	!	:
BITYA_12WSHAM_CB2KO_2C2	3708	6614	2017-04-24 07:10:00	0.80 / 1 / 224.000000	0.0100 0.0100 0.0100	2.91859	2.10194	0.21484	0.41285	-0.06473	0.62769	0.29909	0.37909	0.43218	0.19551	16.6163	0.37429	0.2749	1.03401	2.28448	0.45262	matched	635.491	644.347	~	+-	0.212	0.0267	!	:
BITYA_12WSHAM_CB2KO_2C3	3709	6615	2017-04-24 07:31:00	0.80 / 1 / 224.000000	0.0100 0.0100 0.0100	1.58359	1.53305	0.2011	0.28815	0.07119	0.48925	0.26604	0.31138	0.32814	0.16111	-29.3045	0.31477	0.23028	0.92074	2.0425	0.45079	matched	636.312	648.041	~	+-	0.1994	0.0278	!	:
BITYA_12WSHAM_CB2KO_2C4	3710	6616	2017-04-24 07:56:00	0.80 / 1 / 224.000000	0.0100 0.0100 0.0100	1.29155	2.74008	0.25209	0.21081	0.06965	0.4629	0.27564	0.27254	0.30424	0.15866	-53.3084	0.29442	0.23274	0.87005	2.03214	0.42815	matched	587.052	628.885	~	+-	0.1868	0.0217	!	:
BITYA_12WSHAM_CB2KO_2C5	3711	6617	2017-04-24 08:19:00	0.80 / 1 / 224.000000	0.0100 0.0100 0.0100	2.16688	1.21547	0.22076	0.27961	-0.07614	0.50037	0.28161	0.29627	0.33184	0.16853	34.4285	0.32499	0.2489	0.93263	2.06772	0.45104	matched	626.597	638.189	~	+-	0.1995	0.0212	0	0
BITYA_CBD2_12W_SH1	3781	6807	2017-05-14 18:18:00	0.80 / 1 / 224.000000	0.0100 0.0100 0.0100	3.03331	1.87714	0.09634	0.16621	-0.02237	0.26255	0.15937	0.19472	0.1728	0.08975	16.3366	0.19333	0.14867	0.65079	1.53128	0.42499	matched	586.642	622.043	~	+-	0.1622	0.021	!	:
BITYA_CBD2_12W_SH2	3782	6808	2017-05-14 18:37:00	0.80 / 1 / 224.000000	0.0100 0.0100 0.0100	2.58005	1.96324	0.09276	0.15028	-0.01887	0.24304	0.14765	0.18396	0.15609	0.08695	16.6675	0.181	0.14822	0.61807	1.50259	0.41134	matched	574.874	626.148	~	+-	0.1552	0.02	!	:
BITYA_CBD2_12W_SH3	3783	6809	2017-05-14 18:58:00	0.80 / 1 / 224.000000	0.0100 0.0100 0.0100	2.98546	1.00119	0.10578	0.1431	0.02675	0.24888	0.16096	0.18038	0.15707	0.09181	-27.5622	0.17954	0.15222	0.65266	1.49006	0.43801	matched	623.723	640.789	~	+-	0.1669	0.0221	!	:
BITYA_CBD2_12W_SH4	3784	6810	2017-05-14 19:19:00	0.80 / 1 / 224.000000	0.0100 0.0100 0.0100	2.87061	2.11997	0.09946	0.1461	-0.02455	0.24556	0.15566	0.18685	0.15673	0.08882	23.2948	0.1859	0.14811	0.62303	1.50875	0.41294	matched	577.884	627.106	~	+-	0.156	0.0179	!	:
BITYA_CBD2_12W_SH5	3785	6811	2017-05-14 19:42:00	0.80 / 1 / 224.000000	0.0100 0.0100 0.0100	2.72067	1.84415	0.10715	0.18865	-0.01347	0.29579	0.1727	0.22129	0.19092	0.10488	9.23968	0.21844	0.16948	0.69031	1.63915	0.42114	matched	575.421	615.749	~	+-	0.1677	0.0201	!	:
BITYA_CBD2_12W_SH6	3762	6788	2017-05-14 11:13:00	0.80 / 1 / 224.000000	0.0100 0.0100 0.0100	1.50694	1.86712	0.08887	0.14023	0.02348	0.22909	0.14261	0.17914	0.14945	0.07965	-21.2026	0.17551	0.13801	0.62509	1.41642	0.44132	matched	599.914	614.517	~	+-	0.1639	0.0209	!	:
BITYA_CBD2_12W_SH7	3763	6789	2017-05-14 11:32:00	0.80 / 1 / 224.000000	0.0100 0.0100 0.0100	2.34361	2.51292	0.11673	0.13648	-0.0361	0.25321	0.16805	0.18718	0.16418	0.08903	37.368	0.18363	0.15102	0.652	1.49924	0.43489	matched	603.883	624.643	~	+-	0.1674	0.0265	!	:
BITYA_CBD2_12W_SH8	3764	6790	2017-05-14 11:49:00	0.80 / 1 / 224.000000	0.0100 0.0100 0.0100	2.8176	0.81318	0.1125	0.17179	0.04158	0.28429	0.1746	0.19858	0.19332	0.09097	-27.2015	0.20395	0.15265	0.68394	1.56593	0.43676	matched	602.514	619.306	~	+-	0.1664	0.0202	!	:
BITYA_CBD2_12W_CBD1	3765	6791	2017-05-14 12:22:00	0.80 / 1 / 224.000000	0.0100 0.0100 0.0100	1.01035	2.87422	0.15231	0.11856	0.02982	0.27088	0.18946	0.16693	0.16979	0.10109	-59.7473	0.19122	0.16217	0.67053	1.57101	0.42682	matched	601.283	632.442	~	+-	0.1669	0.0246	!	:
BITYA_CBD2_12W_CBD2	3766	6792	2017-05-14 12:37:00	0.80 / 1 / 224.000000	0.0100 0.0100 0.0100	1.66808	1.41994	0.16386	0.11746	0.02839	0.28132	0.20406	0.18568	0.17748	0.10384	-64.7413	0.19549	0.16074	0.67227	1.60268	0.41947	matched	591.841	636	~	+-	0.1653	0.0218	!	:
BITYA_CBD2_12W_CBD3	3767	6793	2017-05-14 13:03:00	0.80 / 1 / 224.000000	0.0100 0.0100 0.0100	2.56401	0.84865	0.10387	0.15143	0.0298	0.2553	0.15691	0.17521	0.16585	0.08945	-25.6795	0.18071	0.14967	0.63008	1.53514	0.41044	matched	581.989	631.211	~	+-	0.1558	0.0226	!	:
BITYA_CBD2_12W_CBD4	3768	6794	2017-05-14 13:23:00	0.80 / 1 / 224.000000	0.0100 0.0100 0.0100	2.78186	2.22287	0.12462	0.18862	-0.02876	0.31324	0.19005	0.21731	0.19977	0.11347	20.9575	0.21235	0.1786	0.68833	1.72569	0.39887	matched	568.306	635.042	~	+-	0.1598	0.0201	!	:
BITYA_CBD2_12W_CBD5	3769	6795	2017-05-14 13:41:00	0.80 / 1 / 224.000000	0.0100 0.0100 0.0100	2.44429	2.20169	0.10351	0.13379	-0.02491	0.2373	0.16292	0.1773	0.14789	0.08941	29.2699	0.17762	0.14879	0.62349	1.47494	0.42272	matched	589.789	624.643	~	+-	0.1582	0.0169	!	:
BITYA_CBD2_12W_CBD6	3770	6796	2017-05-14 13:59:00	0.80 / 1 / 224.000000	0.0100 0.0100 0.0100	2.90552	1.47225	0.0984	0.1809	0.01055	0.2793	0.16036	0.19559	0.1823	0.097	-7.22948	0.19704	0.16198	0.64811	1.62135	0.39973	matched	560.917	628.337	~	+-	0.1542	0.0205	!	:
BITYA_CBD2_12W_CBD7	3771	6797	2017-05-14 14:17:00	0.80 / 1 / 224.000000	0.0100 0.0100 0.0100	2.67599	1.89673	0.10457	0.1661	-0.02531	0.27068	0.1691	0.19579	0.17534	0.09534	19.633	0.19144	0.15691	0.65346	1.57052	0.41608	matched	593.21	640.515	~	+-	0.1606	0.0206	!	:
BITYA_CBD2_12W_CBD8	3772	6798	2017-05-14 14:44:00	0.80 / 1 / 224.000000	0.0100 0.0100 0.0100	3.34289	1.09146	0.09112	0.14191	0.0185	0.23303	0.14901	0.1692	0.14802	0.08501	-17.9645	0.17192	0.14417	0.62943	1.44046	0.43697	matched	630.428	648.315	~	+-	0.1618	0.0189	!	:
BITYA_CBD2_12W_OVX_VEH1	3773	6799	2017-05-14 15:23:00	0.80 / 1 / 224.000000	0.0100 0.0100 0.0100	3.34959	1.37144	0.09255	0.1481	0.00385	0.24064	0.14924	0.17532	0.14852	0.09212	-4.01269	0.17584	0.15015	0.63113	1.4827	0.42566	matched	587.463	625.874	~	+-	0.1598	0.0178	0	0
BITYA_CBD2_12W_OVX_VEH2	3774	6800	2017-05-14 15:44:00	0.80 / 1 / 224.000000	0.0100 0.0100 0.0100	2.85386	1.80123	0.09033	0.15197	-0.01613	0.2423	0.15179	0.17692	0.15598	0.08632	13.7507	0.17326	0.14635	0.61559	1.49555	0.41162	matched	579.389	629.021	~	+-	0.1539	0.0186	!	:
BITYA_CBD2_12W_OVX_VEH3	3775	6801	2017-05-14 16:01:00	0.80 / 1 / 224.000000	0.0100 0.0100 0.0100	2.74077	1.18694	0.11777	0.2002	-0.00188	0.31797	0.18421	0.21083	0.20044	0.11753	1.27861	0.21028	0.18352	0.71314	1.72444	0.41355	matched	581.168	631.621	~	+-	0.1715	0.0328	!	:
BITYA_CBD2_12W_OVX_VEH4	3776	6802	2017-05-14 16:28:00	0.80 / 1 / 224.000000	0.0100 0.0100 0.0100	2.3387	2.18236	0.11306	0.12677	-0.03296	0.23984	0.16709	0.16652	0.15364	0.0862	39.0382	0.17319	0.14018	0.607	1.49942	0.40482	matched	575.284	631.895	~	+-	0.1518	0.0214	!	:
BITYA_CBD2_12W_OVX_VEH5	3777	6803	2017-05-14 16:47:00	0.80 / 1 / 224.000000	0.0100 0.0100 0.0100	2.7965	1.36854	0.08967	0.15847	-0.00333	0.24815	0.15224	0.18317	0.15873	0.08941	2.7507	0.18225	0.15047	0.63121	1.5054	0.4193	matched	583.768	623.822	~	+-	0.1586	0.0208	!	:
BITYA_CBD2_12W_OVX_VEH6	3778	6804	2017-05-14 17:07:00	0.80 / 1 / 224.000000	0.0100 0.0100 0.0100	2.60197	1.55765	0.10169	0.1527	-0.01382	0.25439	0.16463	0.18547	0.1563	0.0981	14.1538	0.18399	0.15989	0.6521	1.52547	0.42747	matched	601.42	638.736	~	+-	0.1628	0.0194	!	:
BITYA_CBD2_12W_OVX_VEH7	3779	6805	2017-05-14 17:31:00	0.80 / 1 / 224.000000	0.0100 0.0100 0.0100	1.52097	2.6455	0.1097	0.18594	-0.00614	0.29563	0.17459	0.20653	0.18656	0.10907	4.60524	0.20513	0.16923	0.6767	1.66577	0.40624	matched	573.779	633.947	~	+-	0.1566	0.0215	!	:
BITYA_CBD2_12W_OVX_VEH8	3780	6806	2017-05-14 18:00:00	0.80 / 1 / 224.000000	0.0100 0.0100 0.0100	1.91711	1.28768	0.1419	0.11499	0.03315	0.25689	0.18816	0.17538	0.1644	0.09249	-56.0955	0.18607	0.15386	0.64665	1.52872	0.423	matched	604.704	642.841	~	+-	0.1621	0.0206	!	:

## Sheet: moi rcc
Patient-Name	S-No	M-No	ListDate	Segmentation	El_size_mm	CMx[mm]	CMy[mm]	Ixx[mm^4]	Iyy[mm^4]	Ixy[mm^4]	pMOI[mm^4]	Ixx/Cy[mm^3]	Iyy/Cx[mm^3]	Imax[mm^4]	Imin[mm^4]	Angle[deg]	Imax/Cmax[mm^3]	Imin/Cmin[mm^3]	BArea[mm^2]	TArea[mm^2]	BA/TA[1]	TRI-Ct.Th	Mean1	Mean1SD	Mean2	Mean2SD	DT-Ct.Th+	DT-Ct.Th.SD	DT-Ct.Sp+	DT-Ct.Sp.SD
BITYA_OGPRCC_V_1784	2722	4922	2016-04-18 12:23:00	0.80 / 2 / 224.000000	0.0100 0.0100 0.0100	1.43908	1.00065	0.017	0.00956	0.0099	0.02656	0.03438	0.02143	0.02386	0.00271	-55.3404	0.03822	0.00927	0.24373	0.24373	1	matched	1270.99	138.16	~	+-	0.1935	0.019	0	0
BITYA_OGPRCC_V_1758	2723	4923	2016-04-18 12:36:00	0.80 / 2 / 224.000000	0.0100 0.0100 0.0100	1.14563	1.24952	0.02591	0.06105	0.01263	0.08695	0.04078	0.08268	0.06518	0.02177	-17.88	0.0949	0.04001	0.36446	0.3645	0.99989	matched	1232.59	136.384	~	+-	0.1621	0.0162	!	:
BITYA_OGPRCC_V_1_1	2724	4926	2016-04-18 12:48:00	0.80 / 2 / 224.000000	0.0100 0.0100 0.0100	1.33817	1.04969	0.11906	0.05635	-0.00204	0.17541	0.14256	0.10286	0.11941	0.056	-91.7466	0.13987	0.09751	0.47674	0.47704	0.99937	matched	1253.37	149.913	~	+-	0.1595	0.0293	!	:
BITYA_OGPRCC_V_1_2	2725	4927	2016-04-18 13:00:00	0.80 / 2 / 224.000000	0.0100 0.0100 0.0100	0.55295	0.58434	0.03898	0.07359	0.00861	0.11257	0.06842	0.10579	0.07561	0.03695	-13.2268	0.0942	0.05561	0.40388	0.40388	1	matched	1239.29	137.34	~	+-	0.1607	0.0161	0	0
BITYA_OGPRCC_V_2_1	2726	4928	2016-04-18 13:13:00	0.80 / 2 / 224.000000	0.0100 0.0100 0.0100	1.05584	0.44336	0.01476	0.10393	-0.00288	0.1187	0.03451	0.12819	0.10403	0.01467	1.85107	0.12649	0.03261	0.34812	0.34813	0.99997	matched	1234.64	142.67	~	+-	0.1453	0.0114	!	:
BITYA_OGPRCC_V_2_2	2727	4929	2016-04-18 13:25:00	0.80 / 2 / 224.000000	0.0100 0.0100 0.0100	1.15691	0.97322	0.01174	0.04052	0.0138	0.05226	0.02439	0.05563	0.04608	0.00618	-21.925	0.06533	0.01767	0.30194	0.30196	0.99992	matched	1308.99	150.733	~	+-	0.1821	0.0153	!	:
BITYA_OGPRCC_V_1785	2728	4930	2016-04-18 13:37:00	0.80 / 2 / 224.000000	0.0100 0.0100 0.0100	0.64984	0.87645	0.12533	0.10467	-0.03265	0.23	0.16971	0.1599	0.14925	0.08075	53.7666	0.17266	0.13088	0.59666	0.59669	0.99996	matched	1301.06	159.615	~	+-	0.1572	0.0256	0	0
BITYA_OGPRCC_V_1760	2729	4931	2016-04-18 13:49:00	0.80 / 2 / 224.000000	0.0100 0.0100 0.0100	0.59914	0.45772	0.00909	0.01766	0.01125	0.02674	0.02055	0.03017	0.02542	0.00132	-34.5865	0.03875	0.00607	0.19885	0.19885	1	matched	1277.55	145.54	~	+-	0.1505	0.0145	0	0
BITYA_OGPRCC_10NG_1799	2730	4932	2016-04-18 13:55:00	0.80 / 2 / 224.000000	0.0100 0.0100 0.0100	0.5819	0.59127	0.07867	0.06183	-0.00057	0.1405	0.12036	0.0935	0.07884	0.06166	88.4236	0.11437	0.09033	0.42442	0.42444	0.99995	matched	1331.12	166.175	~	+-	0.1752	0.0236	!	:
BITYA_OGPRCC_10NG_1779	2731	4933	2016-04-18 14:07:00	0.80 / 2 / 224.000000	0.0100 0.0100 0.0100	0.78809	0.99839	0.02806	0.04563	-0.02475	0.07368	0.04787	0.05908	0.0631	0.01058	35.2245	0.07887	0.0114	0.33492	0.33493	0.99996	matched	1319.1	159.069	~	+-	0.1835	0.0175	0	0
BITYA_OGPRCC_10NG_1783	2732	4934	2016-04-18 14:14:00	0.80 / 2 / 224.000000	0.0100 0.0100 0.0100	0.72465	0.54914	0.01958	0.01363	-0.01028	0.03321	0.03668	0.02615	0.02733	0.00588	53.0118	0.05005	0.01678	0.26033	0.26057	0.99909	matched	1306.12	151.279	~	+-	0.1783	0.0134	!	:
BITYA_OGPRCC_10NG_1759	2733	4935	2016-04-18 14:27:00	0.80 / 2 / 224.000000	0.0100 0.0100 0.0100	1.03014	0.59616	0.11323	0.14074	-0.02223	0.25397	0.16314	0.16451	0.15316	0.10081	29.2305	0.14639	0.15479	0.59719	0.59719	1	matched	1287.12	161.255	~	+-	0.1543	0.0219	0	0
BITYA_OGPRCC_10NG_1777	2734	4936	2016-04-18 14:33:00	0.80 / 2 / 224.000000	0.0100 0.0100 0.0100	0.66385	0.43774	0.00849	0.01938	-0.00734	0.02786	0.02005	0.03339	0.0231	0.00477	26.9626	0.04144	0.01425	0.23724	0.23727	0.99987	matched	1315.95	158.249	~	+-	0.1709	0.0211	!	:
BITYA_OGPRCC_10NG_1793	2735	4937	2016-04-18 14:45:00	0.80 / 2 / 224.000000	0.0100 0.0100 0.0100	1.14927	0.87375	0.1124	0.13484	-0.02553	0.24723	0.1642	0.1834	0.1516	0.09563	32.9597	0.17639	0.15449	0.62958	0.62958	1	matched	1334.68	167.405	~	+-	0.1594	0.0213	0	0
BITYA_OGPRCC_10NG_1763	2736	4939	2016-04-18 14:58:00	0.80 / 2 / 224.000000	0.0100 0.0100 0.0100	1.16651	0.40084	0.00584	0.03963	-0.00832	0.04547	0.01515	0.05517	0.04157	0.0039	13.1259	0.05878	0.01285	0.24936	0.24936	1	matched	1295.18	157.702	~	+-	0.1545	0.0118	0	0
BITYA_OGPRCC_10NG_CAGE4	2737	4940	2016-04-18 15:11:00	0.80 / 2 / 224.000000	0.0100 0.0100 0.0100	0.75676	1.25494	0.05659	0.10182	-0.00919	0.15841	0.08986	0.14009	0.10362	0.05479	11.076	0.12554	0.08164	0.48595	0.48599	0.99992	matched	1296.82	154.696	~	+-	0.1574	0.015	!	:
BITYA_OGPRCC_100NG_1726	2738	4941	2016-04-18 15:18:00	0.80 / 2 / 224.000000	0.0100 0.0100 0.0100	0.61959	0.44373	0.00788	0.02724	0.01267	0.03511	0.01836	0.04497	0.03351	0.00161	-26.2996	0.04674	0.00634	0.21944	0.21944	1	matched	1306.8	154.012	~	+-	0.1516	0.0147	0	0
BITYA_OGPRCC_100NG_1797	2739	4942	2016-04-18 15:30:00	0.80 / 2 / 224.000000	0.0100 0.0100 0.0100	0.53158	1.13383	0.05013	0.01231	-0.01263	0.06244	0.06679	0.02379	0.05398	0.00847	73.0367	0.07309	0.02071	0.32212	0.32213	0.99997	matched	1354.22	169.591	~	+-	0.1808	0.0159	!	:
BITYA_OGPRCC_100NG_1796	2740	4943	2016-04-18 15:43:00	0.80 / 2 / 224.000000	0.0100 0.0100 0.0100	1.0437	0.66072	0.07461	0.1002	-0.01018	0.17481	0.11476	0.13502	0.10386	0.07095	19.0792	0.1202	0.09761	0.48208	0.48277	0.99857	matched	1307.48	169.045	~	+-	0.1489	0.0171	!	:
BITYA_OGPRCC_100NG_1762	2741	4944	2016-04-18 15:50:00	0.80 / 2 / 224.000000	0.0100 0.0100 0.0100	0.54518	0.79046	0.00823	0.02026	-0.0114	0.02848	0.01811	0.03824	0.02714	0.00135	31.116	0.04085	0.00579	0.22119	0.22119	0.99999	matched	1300.51	143.353	~	+-	0.1665	0.0188	!	:
BITYA_OGPRCC_100NG_1798	2742	4945	2016-04-18 16:04:00	0.80 / 2 / 224.000000	0.0100 0.0100 0.0100	0.83246	1.18746	0.06462	0.11333	-0.01462	0.17795	0.0926	0.15363	0.1174	0.06055	15.5318	0.13259	0.08002	0.53204	0.53226	0.99958	matched	1353.4	169.181	~	+-	0.1781	0.0304	0	0
BITYA_OGPRCC_100NG_1792	2743	4946	2016-04-18 16:18:00	0.80 / 2 / 224.000000	0.0100 0.0100 0.0100	1.16699	0.73165	0.03738	0.05493	0.01981	0.09231	0.06648	0.07768	0.06783	0.02449	-33.0573	0.08419	0.02865	0.35834	0.3584	0.99981	matched	1365.01	167.132	~	+-	0.1856	0.0184	!	:
BITYA_OGPRCC_100NG_1755	2744	4947	2016-04-18 16:31:00	0.80 / 2 / 224.000000	0.0100 0.0100 0.0100	0.92367	0.65798	0.10465	0.15846	-0.02788	0.26311	0.16654	0.19066	0.17037	0.09274	23.0052	0.19019	0.1565	0.66281	0.66333	0.99922	matched	1355.45	174.784	~	+-	0.1665	0.0225	!	:
BITYA_OGPRCC_100NG_1795	2745	4948	2016-04-18 16:45:00	0.80 / 2 / 224.000000	0.0100 0.0100 0.0100	0.51047	0.20265	0.00179	0.01567	0.00095	0.01746	0.00931	0.03041	0.01574	0.00172	-3.89559	0.02998	0.00773	0.19163	0.1917	0.99967	matched	1346.84	165.765	~	+-	0.1687	0.015	!	:

## Sheet: CORT
SampName	SampNo	MeasNo	MeasDate	ListDate	Filename	S-DOB	S-Remark	Meas-Rmk	Site	Energy-I-Code	Integr.Time	ControlfileNo	Ctrlf-Name	Sigma	Support	Threshold	Unit	Data-Threshold	VOX-TV	VOX-BV	VOX-BV/TV	Conn-Dens.	TRI-SMI	DT-Tb.N	DT-Tb.Th	DT-Tb.Sp	DT-Tb.(1/N).SD	DT-Tb.Th.SD	DT-Tb.Sp.SD	Mean1	Mean2	Mean3	Mean4	Mean5	Mean-Units	TRI-TV	TRI-BV	TRI-BV/TV	TRI-BS	TRI-BS/BV	TRI-Tb.N	TRI-Tb.Th	TRI-Tb.Sp	TRI-DA	TRI-|H1|	TRI-|H2|	TRI-|H3|	TRI-H1x	TRI-H1y
BITYA_OGPRCC_V_1784	2722	4922	2016-04-10 15:23:00	2017-08-15 14:51:00	R0001919				Custom	-	-	35	-	0.8	1	224	6	7339	0.6319	0.6319	1	-	-	-	0.1623	! 0.000	-	0.0317	! 0.000	543.569	1301.61	-	-	-	[mg HA/ccm]	-	-	-	-	-	-	-	-	-	-	-	-	-	-
BITYA_OGPRCC_V_1758	2723	4923	2016-04-10 15:23:00	2017-08-15 15:10:00	R0001919				Custom	-	-	35	-	0.8	1	224	6	7339	0.6838	0.6838	0.9999	-	-	-	0.1514	! 0.000	-	0.0196	! 0.000	505.032	1279.47	-	-	-	[mg HA/ccm]	-	-	-	-	-	-	-	-	-	-	-	-	-	-
BITYA_OGPRCC_V_1_1	2724	4926	2016-04-10 15:23:00	2017-08-15 16:54:00	R0001919				Custom	-	-	35	-	0.8	1	224	6	7339	0.6287	0.6287	1	-	-	-	0.1588	! 0.000	-	0.0258	! 0.000	560.925	1320.19	-	-	-	[mg HA/ccm]	-	-	-	-	-	-	-	-	-	-	-	-	-	-
BITYA_OGPRCC_V_1_2	2725	4927	2016-04-10 15:23:00	2017-08-15 17:09:00	R0001919				Custom	-	-	35	-	0.8	1	224	6	7339	0.6448	0.6447	0.9998	-	-	-	0.1603	! 0.010	-	0.0179	! 0.000	559.148	1295.59	-	-	-	[mg HA/ccm]	-	-	-	-	-	-	-	-	-	-	-	-	-	-
BITYA_OGPRCC_V_2_1	2726	4962	2016-04-10 15:23:00	2017-08-15 17:24:00	R0001919				Custom	-	-	35	-	0.8	1	224	6	7339	0.625	0.6248	0.9996	-	-	-	0.1536	! 0.000	-	0.0158	! 0.000	548.216	1296.14	-	-	-	[mg HA/ccm]	-	-	-	-	-	-	-	-	-	-	-	-	-	-
BITYA_OGPRCC_V_2_2	2727	4929	2016-04-10 23:20:00	2017-08-15 17:40:00	R0001920				Custom	-	-	35	-	0.8	1	224	6	7339	0.6714	0.6713	0.9999	-	-	-	0.1689	! 0.000	-	0.0235	! 0.000	618.594	1361.32	-	-	-	[mg HA/ccm]	-	-	-	-	-	-	-	-	-	-	-	-	-	-
BITYA_OGPRCC_V_1785	2728	4930	2016-04-10 23:20:00	2017-08-15 17:56:00	R0001920				Custom	-	-	35	-	0.8	1	224	6	7339	0.6251	0.6246	0.9992	-	-	-	0.1589	! 0.000	-	0.0249	! 0.000	579.51	1364.19	-	-	-	[mg HA/ccm]	-	-	-	-	-	-	-	-	-	-	-	-	-	-
BITYA_OGPRCC_V_1760	2729	4931	2016-04-10 23:20:00	2017-08-15 18:11:00	R0001920				Custom	-	-	35	-	0.8	1	224	6	7339	0.6946	0.6945	0.9999	-	-	-	0.1657	! 0.000	-	0.0221	! 0.000	584.976	1380.32	-	-	-	[mg HA/ccm]	-	-	-	-	-	-	-	-	-	-	-	-	-	-
BITYA_OGPRCC_10ng_1799	2730	4932	2016-04-10 23:20:00	2017-08-15 18:23:00	R0001920				Custom	-	-	35	-	0.8	1	224	6	7339	0.6941	0.6937	0.9994	-	-	-	0.1675	! 0.000	-	0.0257	! 0.000	602.058	1386.88	-	-	-	[mg HA/ccm]	-	-	-	-	-	-	-	-	-	-	-	-	-	-
BITYA_OGPRCC_10ng_1779	2731	4933	2016-04-10 23:20:00	2017-08-15 18:39:00	R0001920				Custom	-	-	35	-	0.8	1	224	6	7339	0.6871	0.6867	0.9994	-	-	-	0.1644	! 0.010	-	0.0254	! 0.000	576.777	1354.9	-	-	-	[mg HA/ccm]	-	-	-	-	-	-	-	-	-	-	-	-	-	-
BITYA_OGPRCC_10ng_1783	2732	4934	2016-04-11 08:18:00	2017-08-15 18:51:00	R0001921				Custom	-	-	35	-	0.8	1	224	6	7339	0.7009	0.7008	0.9997	-	-	-	0.1669	! 0.000	-	0.0177	! 0.000	594.406	1360.91	-	-	-	[mg HA/ccm]	-	-	-	-	-	-	-	-	-	-	-	-	-	-
BITYA_OGPRCC_10ng_1759	2733	4935	2016-04-11 08:18:00	2017-08-15 19:08:00	R0001921				Custom	-	-	35	-	0.8	1	224	6	7339	0.6961	0.6958	0.9995	-	-	-	0.1568	! 0.000	-	0.0235	! 0.000	539.06	1348.89	-	-	-	[mg HA/ccm]	-	-	-	-	-	-	-	-	-	-	-	-	-	-
BITYA_OGPRCC_10ng_1777	2734	4936	2016-04-11 08:18:00	2017-08-15 19:17:00	R0001921				Custom	-	-	35	-	0.8	1	224	6	7339	0.6314	0.6312	0.9997	-	-	-	0.1566	! 0.000	-	0.0247	! 0.000	587.026	1382.1	-	-	-	[mg HA/ccm]	-	-	-	-	-	-	-	-	-	-	-	-	-	-
BITYA_OGPRCC_10ng_1793	2735	4938	2016-04-11 08:18:00	2017-08-15 19:35:00	R0001921				Custom	-	-	35	-	0.8	1	224	6	7339	0.6386	0.6382	0.9993	-	-	-	0.1589	! 0.000	-	0.0208	! 0.000	593.996	1400.68	-	-	-	[mg HA/ccm]	-	-	-	-	-	-	-	-	-	-	-	-	-	-
BITYA_OGPRCC_10ng_1763	2736	4939	2016-04-11 08:18:00	2017-08-15 19:49:00	R0001921				Custom	-	-	35	-	0.8	1	224	6	7339	0.6206	0.6206	1	-	-	-	0.1584	! 0.000	-	0.0208	! 0.000	586.889	1363.92	-	-	-	[mg HA/ccm]	-	-	-	-	-	-	-	-	-	-	-	-	-	-
BITYA_OGPRCC_10ng_cage4	2737	4940	2016-04-11 18:29:00	2017-08-15 20:06:00	R0001922				Custom	-	-	35	-	0.8	1	224	6	7339	0.6142	0.6141	0.9998	-	-	-	0.1515	! 0.000	-	0.0165	! 0.000	575.137	1353.26	-	-	-	[mg HA/ccm]	-	-	-	-	-	-	-	-	-	-	-	-	-	-
BITYA_OGPRCC_100ng_1726	2738	4941	2016-04-11 18:29:00	2017-08-15 20:17:00	R0001922				Custom	-	-	35	-	0.8	1	224	6	7339	0.6516	0.6515	0.9998	-	-	-	0.1662	! 0.000	-	0.0229	! 0.000	628.16	1406.69	-	-	-	[mg HA/ccm]	-	-	-	-	-	-	-	-	-	-	-	-	-	-
BITYA_OGPRCC_100ng_1797	2739	4942	2016-04-11 18:29:00	2017-08-15 20:32:00	R0001922				Custom	-	-	35	-	0.8	1	224	6	7339	0.6463	0.6457	0.9992	-	-	-	0.158	! 0.000	-	0.0256	! 0.000	575.957	1398.77	-	-	-	[mg HA/ccm]	-	-	-	-	-	-	-	-	-	-	-	-	-	-
BITYA_OGPRCC_100ng_1796	2740	4943	2016-04-11 18:29:00	2017-08-15 20:50:00	R0001922				Custom	-	-	35	-	0.8	1	224	6	7339	0.6517	0.6516	0.9999	-	-	-	0.1578	! 0.000	-	0.0235	! 0.000	582.516	1396.44	-	-	-	[mg HA/ccm]	-	-	-	-	-	-	-	-	-	-	-	-	-	-
BITYA_OGPRCC_100ng_1762	2741	4944	2016-04-11 18:29:00	2017-08-15 21:01:00	R0001922				Custom	-	-	35	-	0.8	1	224	6	7339	0.5956	0.5952	0.9993	-	-	-	0.1514	! 0.000	-	0.0231	! 0.000	556.005	1351.08	-	-	-	[mg HA/ccm]	-	-	-	-	-	-	-	-	-	-	-	-	-	-
BITYA_OGPRCC_100ng_1798	2742	4945	2016-04-12 02:51:00	2017-08-15 21:18:00	R0001923				Custom	-	-	35	-	0.8	1	224	6	7339	0.7031	0.703	0.9999	-	-	-	0.1708	! 0.000	-	0.03	! 0.000	611.761	1417.63	-	-	-	[mg HA/ccm]	-	-	-	-	-	-	-	-	-	-	-	-	-	-
BITYA_OGPRCC_100ng_1792	2743	4946	2016-04-12 02:51:00	2017-08-15 21:34:00	R0001923				Custom	-	-	35	-	0.8	1	224	6	7339	0.6838	0.6837	0.9999	-	-	-	0.1709	! 0.000	-	0.0211	! 0.000	654.808	1424.32	-	-	-	[mg HA/ccm]	-	-	-	-	-	-	-	-	-	-	-	-	-	-
BITYA_OGPRCC_100ng_1755	2744	4947	2016-04-12 02:51:00	2017-08-15 21:51:00	R0001923				Custom	-	-	35	-	0.8	1	224	6	7339	0.6643	0.664	0.9994	-	-	-	0.1667	! 0.000	-	0.0224	! 0.000	628.707	1423.09	-	-	-	[mg HA/ccm]	-	-	-	-	-	-	-	-	-	-	-	-	-	-
BITYA_OGPRCC_100ng_1795	2745	4961	2016-04-12 02:51:00	2017-08-15 22:08:00	R0001923				Custom	-	-	35	-	0.8	1	224	6	7339	0.7193	0.7192	0.9998	-	-	-	0.1759	! 0.000	-	0.0237	! 0.000	647.565	1416.26	-	-	-	[mg HA/ccm]	-	-	-	-	-	-	-	-	-	-	-	-	-	-
BITYA_OVX_CBD_1	3113	5879	2016-09-27 14:18:00	2016-11-29 01:53:00	R0002314				Custom	-	-	35	-	0.8	1	224	6	7339	0.7662	0.7662	1	-	-	-	0.1838	0	-	0.0259	0	544.811	1233.96	-	-	-	[mg HA/ccm]	-	-	-	-	-	-	-	-	-	-	-	-	-	-
BITYA_OVX_CBD_2	3114	5880	2016-09-27 14:18:00	2016-11-29 02:10:00	R0002314				Custom	-	-	35	-	0.8	1	224	6	7339	0.7017	0.7017	1	-	-	-	0.1701	! 0.000	-	0.0217	! 0.000	522.752	1233.96	-	-	-	[mg HA/ccm]	-	-	-	-	-	-	-	-	-	-	-	-	-	-
BITYA_OVX_CBD_3	3115	5881	2016-09-27 14:18:00	2016-11-29 02:43:00	R0002314				Custom	-	-	35	-	0.8	1	224	6	7339	0.7007	0.7007	1	-	-	-	0.1599	! 0.000	-	0.0245	! 0.000	492.645	1237.94	-	-	-	[mg HA/ccm]	-	-	-	-	-	-	-	-	-	-	-	-	-	-
BITYA_OVX_CBD_4	3116	5882	2016-09-27 14:18:00	2016-11-29 03:00:00	R0002314				Custom	-	-	35	-	0.8	1	224	6	7339	0.706	0.706	1	-	-	-	0.1669	! 0.000	-	0.0223	! 0.000	525.213	1260.75	-	-	-	[mg HA/ccm]	-	-	-	-	-	-	-	-	-	-	-	-	-	-
BITYA_OVX_CBD_5	3117	5883	2016-09-27 14:18:00	2016-11-29 03:16:00	R0002314				Custom	-	-	35	-	0.8	1	224	6	7339	0.684	0.684	1	-	-	-	0.1668	0	-	0.0185	0	535.344	1246.65	-	-	-	[mg HA/ccm]	-	-	-	-	-	-	-	-	-	-	-	-	-	-
BITYA_OVX_CBD_6	3118	6051	2016-09-27 19:27:00	2016-11-29 03:28:00	R0002315				Custom	-	-	35	-	0.8	1	224	6	7339	0.6849	0.6849	1	-	-	-	0.175	! 0.000	-	0.023	! 0.000	574.256	1281.01	-	-	-	[mg HA/ccm]	-	-	-	-	-	-	-	-	-	-	-	-	-	-
BITYA_OVX_CBD_7	3119	6052	2016-09-27 19:27:00	2016-11-29 03:49:00	R0002315				Custom	-	-	35	-	0.8	1	224	6	7339	0.7297	0.7297	1	-	-	-	0.1701	! 0.000	-	0.0171	! 0.000	534.965	1279.5	-	-	-	[mg HA/ccm]	-	-	-	-	-	-	-	-	-	-	-	-	-	-
BITYA_OVX_6WK_1	3076	5670	2016-09-05 10:14:00	2016-11-29 03:58:00	R0002251				Custom	-	-	35	-	0.8	1	224	6	7339	0.5911	0.5911	1	-	-	-	0.1431	! 0.000	-	0.023	! 0.000	527.119	1331.15	-	-	-	[mg HA/ccm]	-	-	-	-	-	-	-	-	-	-	-	-	-	-
BITYA_OVX_6WK_2	3077	5671	2016-09-05 10:14:00	2016-12-19 12:45:00	R0002251				Custom	-	-	35	-	0.8	1	224	6	7339	0.6033	0.603	0.9997	-	-	-	0.1508	! 0.000	-	0.0273	! 0.000	540.666	1336.35	-	-	-	[mg HA/ccm]	-	-	-	-	-	-	-	-	-	-	-	-	-	-
BITYA_OVX_6WK_3	3078	5908	2016-09-05 10:14:00	2016-12-19 13:04:00	R0002251				Custom	-	-	35	-	0.8	1	224	6	7339	0.5933	0.5932	0.9998	-	-	-	0.1463	! 0.000	-	0.0193	! 0.000	538.887	1335.26	-	-	-	[mg HA/ccm]	-	-	-	-	-	-	-	-	-	-	-	-	-	-
BITYA_OVX_6WK_4	3079	5909	2016-09-27 16:00:00	2016-12-19 13:21:00	R0002251				Custom	-	-	35	-	0.8	1	224	6	7339	0.5909	0.5908	0.9997	-	-	-	0.1449	! 0.000	-	0.0213	! 0.000	537.929	1342.1	-	-	-	[mg HA/ccm]	-	-	-	-	-	-	-	-	-	-	-	-	-	-
BITYA_OVX_6WK_5	3080	6152	2016-09-05 10:14:00	2016-12-19 15:10:00	R0002251				Custom	-	-	35	-	0.8	1	224	6	7339	0.5935	0.5928	0.9987	-	-	-	0.1469	! 0.000	-	0.023	! 0.000	535.877	1318.29	-	-	-	[mg HA/ccm]	-	-	-	-	-	-	-	-	-	-	-	-	-	-
BITYA_OVX_6WK_6	3081	5650	2016-09-06 18:35:00	2016-12-19 13:38:00	R0002252				Custom	-	-	35	-	0.8	1	224	6	7339	0.5677	0.5676	0.9997	-	-	-	0.1374	! 0.000	-	0.0181	! 0.000	505.5	1325.81	-	-	-	[mg HA/ccm]	-	-	-	-	-	-	-	-	-	-	-	-	-	-
BITYA_OVX_6WK_7	3082	5691	2016-09-06 18:35:00	2016-12-19 13:50:00	R0002252				Custom	-	-	35	-	0.8	1	224	6	7339	0.6329	0.6324	0.9993	-	-	-	0.1542	! 0.023	-	0.0211	! 0.009	563.38	1350.58	-	-	-	[mg HA/ccm]	-	-	-	-	-	-	-	-	-	-	-	-	-	-
BITYA_SHAM_6WK_1	3083	5692	2016-09-06 18:35:00	2016-12-19 14:06:00	R0002252				Custom	-	-	35	-	0.8	1	224	6	7339	0.677	0.6764	0.9992	-	-	-	0.1665	! 0.000	-	0.019	! 0.000	608.398	1355.64	-	-	-	[mg HA/ccm]	-	-	-	-	-	-	-	-	-	-	-	-	-	-
BITYA_SHAM_6WK_2	3084	5693	2016-09-06 18:35:00	2016-12-19 14:16:00	R0002252				Custom	-	-	35	-	0.8	1	224	6	7339	0.6104	0.6103	0.9999	-	-	-	0.1492	! 0.000	-	0.0207	! 0.000	548.602	1338.95	-	-	-	[mg HA/ccm]	-	-	-	-	-	-	-	-	-	-	-	-	-	-
BITYA_SHAM_6WK_3	3085	5694	2016-09-06 18:35:00	2016-12-19 14:37:00	R0002252				Custom	-	-	35	-	0.8	1	224	6	7339	0.5575	0.5572	0.9994	-	-	-	0.1357	! 0.010	-	0.0179	! 0.000	503.173	1318.84	-	-	-	[mg HA/ccm]	-	-	-	-	-	-	-	-	-	-	-	-	-	-
BITYA_SHAM_6WK_4	3086	5695	2016-09-07 04:44:00	2016-12-19 14:53:00	R0002253				Custom	-	-	35	-	0.8	1	224	6	7339	0.6622	0.6616	0.9991	-	-	-	0.1615	! 0.000	-	0.0193	! 0.000	585.684	1366.18	-	-	-	[mg HA/ccm]	-	-	-	-	-	-	-	-	-	-	-	-	-	-
BITYA_SHAM_12WK_1	3120	6053	2016-09-27 19:27:00	42716.6	R0002315				Custom	-	-	35	-	0.8	1	224	6	7339	0.8096	0.8096	1	-	-	-	0.2056	0	-	0.0387	0	636.553	1328.45	-	-	-	[mg HA/ccm]	-	-	-	-	-	-	-	-	-	-	-	-	-	-
BITYA_SHAM_12WK_2	3121	6054	2016-09-27 19:27:00	42716.6	R0002315				Custom	-	-	35	-	0.8	1	224	6	7339	0.7416	0.7416	1	-	-	-	0.1866	! 0.000	-	0.0275	! 0.000	601.238	1316.42	-	-	-	[mg HA/ccm]	-	-	-	-	-	-	-	-	-	-	-	-	-	-
BITYA_SHAM_12WK_3	3122	6055	2016-09-27 19:27:00	2016-12-22 14:12:00	R0002315				Custom	-	-	35	-	0.8	1	224	6	7339	0.7739	0.7739	1	-	-	-	0.1904	! 0.000	-	0.0252	! 0.000	610.611	1312.45	-	-	-	[mg HA/ccm]	-	-	-	-	-	-	-	-	-	-	-	-	-	-
BITYA_SHAM_12WK_4	3123	5884	2016-09-28 00:27:00	42716.7	R0002316				Custom	-	-	35	-	0.8	1	224	6	7339	0.8223	0.8223	1	-	-	-	0.1971	! 0.000	-	0.0254	! 0.000	609.38	1299.57	-	-	-	[mg HA/ccm]	-	-	-	-	-	-	-	-	-	-	-	-	-	-
BITYA_SHAM_12WK_5	3124	5885	2016-09-28 00:27:00	42716.7	R0002316				Custom	-	-	35	-	0.8	1	224	6	7339	0.8623	0.8623	1	-	-	-	0.2063	0	-	0.03	0	617.333	1302.22	-	-	-	[mg HA/ccm]	-	-	-	-	-	-	-	-	-	-	-	-	-	-
BITYA_SHAM_12WK_6	3125	5886	2016-09-28 00:27:00	42716.7	R0002316				Custom	-	-	35	-	0.8	1	224	6	7339	0.7709	0.7709	1	-	-	-	0.1963	0	-	0.0171	0	659.086	1333.28	-	-	-	[mg HA/ccm]	-	-	-	-	-	-	-	-	-	-	-	-	-	-
BITYA_SHAM_12WK_7	3126	5887	2016-09-28 00:27:00	42716.7	R0002316				Custom	-	-	35	-	0.8	1	224	6	7339	0.742	0.742	1	-	-	-	0.1876	0	-	0.0312	0	608.434	1325.8	-	-	-	[mg HA/ccm]	-	-	-	-	-	-	-	-	-	-	-	-	-	-
BITYA_SHAM_12WK_8	3127	5888	2016-09-28 00:27:00	42716.7	R0002316				Custom	-	-	35	-	0.8	1	224	6	7339	0.8644	0.8644	0.9999	-	-	-	0.2053	! 0.000	-	0.0285	! 0.000	614.493	1272.68	-	-	-	[mg HA/ccm]	-	-	-	-	-	-	-	-	-	-	-	-	-	-
BITYA_SHAM_12WK_9	3128	5889	42641.2	42716.7	R0002317				Custom	-	-	35	-	0.8	1	224	6	7339	0.8045	0.8045	1	-	-	-	0.1912	0	-	0.0277	0	605.688	1307.52	-	-	-	[mg HA/ccm]	-	-	-	-	-	-	-	-	-	-	-	-	-	-
BITYA_SHAM_12WK_10	3129	5890	42641.2	42716.7	R0002317				Custom	-	-	35	-	0.8	1	224	6	7339	0.8654	0.8654	1	-	-	-	0.207	0	-	0.0324	0	615.818	1313.11	-	-	-	[mg HA/ccm]	-	-	-	-	-	-	-	-	-	-	-	-	-	-
BITYA_12wOVX_CB2KO_1OGP1	3682	6586	2017-03-08 05:42:00	2017-04-23 21:46:00	R0002603				Custom	-	-	35	-	0.8	1	224	6	7339	0.7813	0.7812	0.9998	-	-	-	0.1595	! 0.010	-	0.0192	! 0.000	471.428	1347.3	-	-	-	[mg HA/ccm]	-	-	-	-	-	-	-	-	-	-	-	-	-	-
BITYA_12wOVX_CB2KO_1OGP2	3683	6587	2017-03-08 05:42:00	2017-04-23 22:04:00	R0002603				Custom	-	-	35	-	0.8	1	224	6	7339	0.7669	0.7669	1	-	-	-	0.1722	0	-	0.0213	0	569.948	1389.58	-	-	-	[mg HA/ccm]	-	-	-	-	-	-	-	-	-	-	-	-	-	-
BITYA_12wOVX_CB2KO_1OGP3	3684	6588	2017-03-08 05:42:00	2017-04-23 22:21:00	R0002603				Custom	-	-	35	-	0.8	1	224	6	7339	0.8937	0.8937	1	-	-	-	0.1886	0.01	-	0.0251	0	585	1387.66	-	-	-	[mg HA/ccm]	-	-	-	-	-	-	-	-	-	-	-	-	-	-
BITYA_12wOVX_CB2KO_1OGP4	3685	6589	2017-03-08 05:42:00	2017-04-23 22:40:00	R0002603				Custom	-	-	35	-	0.8	1	224	6	7339	0.7913	0.7912	0.9999	-	-	-	0.161	! 0.000	-	0.0195	! 0.000	509.741	1358.24	-	-	-	[mg HA/ccm]	-	-	-	-	-	-	-	-	-	-	-	-	-	-
BITYA_12wOVX_CB2KO_1OGP6	3686	6590	2017-03-08 05:42:00	2017-04-23 22:57:00	R0002603				Custom	-	-	35	-	0.8	1	224	6	7339	0.6534	0.6531	0.9995	-	-	-	0.1493	! 0.000	-	0.0211	! 0.000	512.889	1361.53	-	-	-	[mg HA/ccm]	-	-	-	-	-	-	-	-	-	-	-	-	-	-
BITYA_12wOVX_CB2KO_2OGP1	3687	6591	2017-03-08 09:31:00	2017-04-23 23:18:00	R0002604				Custom	-	-	35	-	0.8	1	224	6	7339	0.8166	0.8163	0.9997	-	-	-	0.1738	! 0.010	-	0.0216	! 0.000	530.677	1358.93	-	-	-	[mg HA/ccm]	-	-	-	-	-	-	-	-	-	-	-	-	-	-
BITYA_12wOVX_CB2KO_2OGP3	3688	6592	2017-03-08 09:31:00	2017-04-23 23:38:00	R0002604				Custom	-	-	35	-	0.8	1	224	6	7339	0.8823	0.882	0.9997	-	-	-	0.1817	! 0.000	-	0.0243	! 0.000	573.232	1387.11	-	-	-	[mg HA/ccm]	-	-	-	-	-	-	-	-	-	-	-	-	-	-
BITYA_12wOVX_CB2KO_2OGP5	3689	6593	2017-03-08 09:31:00	2017-04-23 23:57:00	R0002604				Custom	-	-	35	-	0.8	1	224	6	7339	0.8221	0.8215	0.9992	-	-	-	0.1798	! 0.000	-	0.0195	! 0.000	585.41	1378.77	-	-	-	[mg HA/ccm]	-	-	-	-	-	-	-	-	-	-	-	-	-	-
BITYA_12wOVX_CB2KO_2OGP6	3690	6594	2017-03-08 09:31:00	2017-04-24 00:18:00	R0002604				Custom	-	-	35	-	0.8	1	224	6	7339	0.8016	0.8016	1	-	-	-	0.1692	0	-	0.0251	0	540.529	1396.69	-	-	-	[mg HA/ccm]	-	-	-	-	-	-	-	-	-	-	-	-	-	-
BITYA_12wOVX_CB2KO_2OGP7	3691	6595	2017-03-08 09:31:00	2017-04-24 00:34:00	R0002604				Custom	-	-	35	-	0.8	1	224	6	7339	0.7997	0.7993	0.9995	-	-	-	0.185	! 0.000	-	0.0209	! 0.000	619.345	1383.97	-	-	-	[mg HA/ccm]	-	-	-	-	-	-	-	-	-	-	-	-	-	-
BITYA_12wOVX_CB2KO_3c1	3692	6596	2017-03-08 13:43:00	2017-04-24 00:53:00	R0002605				Custom	-	-	35	-	0.8	1	224	6	7339	0.9069	0.9066	0.9997	-	-	-	0.1899	! 0.000	-	0.0222	! 0.000	590.61	1353.86	-	-	-	[mg HA/ccm]	-	-	-	-	-	-	-	-	-	-	-	-	-	-
BITYA_12wOVX_CB2KO_3c2	3693	6597	2017-03-08 13:43:00	2017-04-24 01:13:00	R0002605				Custom	-	-	35	-	0.8	1	224	6	7339	0.8211	0.8211	1	-	-	-	0.1802	! 0.000	-	0.0258	! 0.000	573.095	1374.66	-	-	-	[mg HA/ccm]	-	-	-	-	-	-	-	-	-	-	-	-	-	-
BITYA_12wOVX_CB2KO_3c3	3694	6598	2017-03-08 13:43:00	2017-04-24 01:31:00	R0002605				Custom	-	-	35	-	0.8	1	224	6	7339	0.8319	0.8318	0.9999	-	-	-	0.1848	! 0.000	-	0.0255	! 0.000	597.178	1376.3	-	-	-	[mg HA/ccm]	-	-	-	-	-	-	-	-	-	-	-	-	-	-
BITYA_12wOVX_CB2KO_3c4	3695	6599	2017-03-08 13:43:00	2017-04-24 01:51:00	R0002605				Custom	-	-	35	-	0.8	1	224	6	7339	0.8242	0.8239	0.9997	-	-	-	0.1843	! 0.010	-	0.0234	! 0.000	600.599	1386.16	-	-	-	[mg HA/ccm]	-	-	-	-	-	-	-	-	-	-	-	-	-	-
BITYA_12wOVX_CB2KO_3c5	3696	6600	2017-03-08 13:43:00	2017-04-24 02:23:00	R0002605				Custom	-	-	35	-	0.8	1	224	6	7339	0.7551	0.7547	0.9994	-	-	-	0.1713	! 0.000	-	0.0223	! 0.000	571.453	1364.95	-	-	-	[mg HA/ccm]	-	-	-	-	-	-	-	-	-	-	-	-	-	-
BITYA_12wOVX_CB2KO_4c1	3697	6601	2017-03-08 17:34:00	2017-04-24 02:42:00	R0002606				Custom	-	-	35	-	0.8	1	224	6	7339	0.9148	0.9142	0.9994	-	-	-	0.1966	! 0.010	-	0.0205	! 0.000	607.987	1359.47	-	-	-	[mg HA/ccm]	-	-	-	-	-	-	-	-	-	-	-	-	-	-
BITYA_12wOVX_CB2KO_4c2	3698	6602	2017-03-08 17:34:00	2017-04-24 03:01:00	R0002606				Custom	-	-	35	-	0.8	1	224	6	7339	0.7866	0.7865	0.9998	-	-	-	0.183	! 0.010	-	0.0224	! 0.000	624.955	1382.6	-	-	-	[mg HA/ccm]	-	-	-	-	-	-	-	-	-	-	-	-	-	-
BITYA_12wOVX_CB2KO_4c3	3699	6603	2017-03-08 17:34:00	2017-04-24 03:37:00	R0002606				Custom	-	-	35	-	0.8	1	224	6	7339	0.8516	0.8515	0.9999	-	-	-	0.1757	! 0.000	-	0.0277	! 0.000	545.044	1357.42	-	-	-	[mg HA/ccm]	-	-	-	-	-	-	-	-	-	-	-	-	-	-
BITYA_12wOVX_CB2KO_4c4	3700	6604	2017-03-08 17:34:00	2017-04-24 04:10:00	R0002606				Custom	-	-	35	-	0.8	1	224	6	7339	0.9157	0.9156	0.9999	-	-	-	0.194	! 0.010	-	0.0232	! 0.000	606.209	1379.32	-	-	-	[mg HA/ccm]	-	-	-	-	-	-	-	-	-	-	-	-	-	-
BITYA_12wOVX_CB2KO_4c5	3701	6605	2017-03-08 17:34:00	2017-04-24 04:40:00	R0002606				Custom	-	-	35	-	0.8	1	224	6	7339	0.8484	0.8483	0.9998	-	-	-	0.1777	! 0.000	-	0.0256	! 0.000	537.245	1329.37	-	-	-	[mg HA/ccm]	-	-	-	-	-	-	-	-	-	-	-	-	-	-
BITYA_12wSHAM_CB2KO_1c1	3702	6606	2017-03-08 21:23:00	2017-04-24 05:00:00	R0002607				Custom	-	-	35	-	0.8	1	224	6	7339	1.01	1.0098	0.9998	-	-	-	0.2036	! 0.000	-	0.0261	! 0.000	592.525	1351.67	-	-	-	[mg HA/ccm]	-	-	-	-	-	-	-	-	-	-	-	-	-	-
BITYA_12wSHAM_CB2KO_1c2	3703	6607	2017-03-08 21:23:00	2017-04-24 05:20:00	R0002607				Custom	-	-	35	-	0.8	1	224	6	7339	0.8478	0.8477	0.9999	-	-	-	0.1828	! 0.010	-	0.0202	! 0.000	560.78	1336.76	-	-	-	[mg HA/ccm]	-	-	-	-	-	-	-	-	-	-	-	-	-	-
BITYA_12wSHAM_CB2KO_1c3	3704	6608	2017-03-08 21:23:00	2017-04-24 05:40:00	R0002607				Custom	-	-	35	-	0.8	1	224	6	7339	0.9725	0.9723	0.9998	-	-	-	0.2051	! 0.010	-	0.0271	! 0.000	642.606	1381.78	-	-	-	[mg HA/ccm]	-	-	-	-	-	-	-	-	-	-	-	-	-	-
BITYA_12wSHAM_CB2KO_1c4	3705	6609	2017-03-08 21:23:00	2017-04-24 05:59:00	R0002607				Custom	-	-	35	-	0.8	1	224	6	7339	0.9441	0.9434	0.9992	-	-	-	0.2034	0.0373	-	0.0223	0.0049	644.933	1387.53	-	-	-	[mg HA/ccm]	-	-	-	-	-	-	-	-	-	-	-	-	-	-
BITYA_12wSHAM_CB2KO_1c5	3706	6610	2017-03-08 21:23:00	2017-04-24 06:18:00	R0002607				Custom	-	-	35	-	0.8	1	224	6	7339	0.9259	0.9259	1	-	-	-	0.1938	0	-	0.0224	0	588.831	1349.9	-	-	-	[mg HA/ccm]	-	-	-	-	-	-	-	-	-	-	-	-	-	-
BITYA_12wSHAM_CB2KO_2c1	3707	6613	2017-03-09 01:10:00	2017-04-24 06:50:00	R0002608				Custom	-	-	35	-	0.8	1	224	6	7339	0.9486	0.9481	0.9994	-	-	-	0.2019	! 0.019	-	0.0267	! 0.001	622.355	1341.41	-	-	-	[mg HA/ccm]	-	-	-	-	-	-	-	-	-	-	-	-	-	-
BITYA_12wSHAM_CB2KO_2c2	3708	6614	2017-03-09 01:10:00	2017-04-24 07:10:00	R0002608				Custom	-	-	35	-	0.8	1	224	6	7339	1.034	1.034	1	-	-	-	0.212	! 0.000	-	0.0267	! 0.000	635.491	1378.49	-	-	-	[mg HA/ccm]	-	-	-	-	-	-	-	-	-	-	-	-	-	-
BITYA_12wSHAM_CB2KO_2c3	3709	6615	2017-03-09 01:10:00	2017-04-24 07:31:00	R0002608				Custom	-	-	35	-	0.8	1	224	6	7339	0.9208	0.9207	0.9998	-	-	-	0.1994	! 0.010	-	0.0278	! 0.000	636.312	1386.43	-	-	-	[mg HA/ccm]	-	-	-	-	-	-	-	-	-	-	-	-	-	-
BITYA_12wSHAM_CB2KO_2c4	3710	6616	2017-03-09 01:10:00	2017-04-24 07:56:00	R0002608				Custom	-	-	35	-	0.8	1	224	6	7339	0.871	0.87	0.9989	-	-	-	0.1868	! 0.000	-	0.0217	! 0.000	587.052	1347.3	-	-	-	[mg HA/ccm]	-	-	-	-	-	-	-	-	-	-	-	-	-	-
BITYA_12wSHAM_CB2KO_2c5	3711	6617	2017-03-09 01:10:00	2017-04-24 08:19:00	R0002608				Custom	-	-	35	-	0.8	1	224	6	7339	0.9326	0.9326	1	-	-	-	0.1995	0	-	0.0212	0	626.597	1363.44	-	-	-	[mg HA/ccm]	-	-	-	-	-	-	-	-	-	-	-	-	-	-
Bitya_CBD2_12w_sh1	3781	6807	2017-04-26 12:38:00	2017-05-14 18:18:00	R0002695				Custom	-	-	35	-	0.8	1	224	6	7339	0.6509	0.6507	0.9998	-	-	-	0.1622	! 0.000	-	0.021	! 0.000	586.642	1351.54	-	-	-	[mg HA/ccm]	-	-	-	-	-	-	-	-	-	-	-	-	-	-
Bitya_CBD2_12w_sh2	3782	6808	2017-04-26 12:38:00	2017-05-14 18:37:00	R0002695				Custom	-	-	35	-	0.8	1	224	6	7339	0.6181	0.618	0.9999	-	-	-	0.1552	! 0.000	-	0.02	! 0.000	574.874	1369.87	-	-	-	[mg HA/ccm]	-	-	-	-	-	-	-	-	-	-	-	-	-	-
Bitya_CBD2_12w_sh3	3783	6809	2017-04-26 12:38:00	2017-05-14 18:58:00	R0002695				Custom	-	-	35	-	0.8	1	224	6	7339	0.6533	0.6526	0.999	-	-	-	0.1669	! 0.000	-	0.0221	! 0.000	623.723	1391.77	-	-	-	[mg HA/ccm]	-	-	-	-	-	-	-	-	-	-	-	-	-	-
Bitya_CBD2_12w_sh4	3784	6810	2017-04-26 12:38:00	2017-05-14 19:19:00	R0002695				Custom	-	-	35	-	0.8	1	224	6	7339	0.6235	0.623	0.9992	-	-	-	0.156	! 0.000	-	0.0179	! 0.000	577.884	1367.27	-	-	-	[mg HA/ccm]	-	-	-	-	-	-	-	-	-	-	-	-	-	-
Bitya_CBD2_12w_sh5	3785	6811	2017-04-26 12:38:00	2017-05-14 19:42:00	R0002695				Custom	-	-	35	-	0.8	1	224	6	7339	0.6909	0.6903	0.9991	-	-	-	0.1677	! 0.010	-	0.0201	! 0.000	575.421	1335.8	-	-	-	[mg HA/ccm]	-	-	-	-	-	-	-	-	-	-	-	-	-	-
Bitya_CBD2_12w_sh6	3762	6788	2017-04-25 17:11:00	2017-05-14 11:13:00	R0002690				Custom	-	-	35	-	0.8	1	224	6	7339	0.6253	0.6251	0.9996	-	-	-	0.1639	! 0.000	-	0.0209	! 0.000	599.914	1330.19	-	-	-	[mg HA/ccm]	-	-	-	-	-	-	-	-	-	-	-	-	-	-
Bitya_CBD2_12w_sh7	3763	6789	2017-04-25 17:11:00	2017-05-14 11:32:00	R0002690				Custom	-	-	35	-	0.8	1	224	6	7339	0.6521	0.652	0.9998	-	-	-	0.1674	! 0.000	-	0.0265	! 0.000	603.883	1358.11	-	-	-	[mg HA/ccm]	-	-	-	-	-	-	-	-	-	-	-	-	-	-
Bitya_CBD2_12w_sh8	3764	6790	2017-04-25 17:11:00	2017-05-14 11:49:00	R0002690				Custom	-	-	35	-	0.8	1	224	6	7339	0.6841	0.6839	0.9997	-	-	-	0.1664	! 0.000	-	0.0202	! 0.000	602.514	1342.1	-	-	-	[mg HA/ccm]	-	-	-	-	-	-	-	-	-	-	-	-	-	-
Bitya_CBD2_12w_CBD1	3765	6791	2017-04-25 21:01:00	2017-05-14 12:22:00	R0002691				Custom	-	-	35	-	0.8	1	224	6	7339	0.6709	0.6705	0.9994	-	-	-	0.1669	! 0.000	-	0.0246	! 0.000	601.283	1376.85	-	-	-	[mg HA/ccm]	-	-	-	-	-	-	-	-	-	-	-	-	-	-
Bitya_CBD2_12w_CBD2	3766	6792	2017-04-25 21:01:00	2017-05-14 12:37:00	R0002691				Custom	-	-	35	-	0.8	1	224	6	7339	0.6723	0.6722	0.9998	-	-	-	0.1653	! 0.000	-	0.0218	! 0.000	591.841	1383.69	-	-	-	[mg HA/ccm]	-	-	-	-	-	-	-	-	-	-	-	-	-	-
Bitya_CBD2_12w_CBD3	3767	6793	2017-04-25 21:01:00	2017-05-14 13:03:00	R0002691				Custom	-	-	35	-	0.8	1	224	6	7339	0.6301	0.63	0.9999	-	-	-	0.1558	! 0.000	-	0.0226	! 0.000	581.989	1382.05	-	-	-	[mg HA/ccm]	-	-	-	-	-	-	-	-	-	-	-	-	-	-
Bitya_CBD2_12w_CBD4	3768	6794	2017-04-25 21:01:00	2017-05-14 13:23:00	R0002691				Custom	-	-	35	-	0.8	1	224	6	7339	0.6883	0.6883	0.9999	-	-	-	0.1598	! 0.000	-	0.0201	! 0.000	568.306	1392.31	-	-	-	[mg HA/ccm]	-	-	-	-	-	-	-	-	-	-	-	-	-	-
Bitya_CBD2_12w_CBD5	3769	6795	2017-04-25 21:01:00	2017-05-14 13:41:00	R0002691				Custom	-	-	35	-	0.8	1	224	6	7339	0.6238	0.6235	0.9994	-	-	-	0.1582	! 0.000	-	0.0169	! 0.000	589.789	1362.35	-	-	-	[mg HA/ccm]	-	-	-	-	-	-	-	-	-	-	-	-	-	-
Bitya_CBD2_12w_CBD6	3770	6796	2017-04-26 00:48:00	2017-05-14 13:59:00	R0002692				Custom	-	-	35	-	0.8	1	224	6	7339	0.6485	0.6481	0.9993	-	-	-	0.1542	! 0.000	-	0.0205	! 0.000	560.917	1376.85	-	-	-	[mg HA/ccm]	-	-	-	-	-	-	-	-	-	-	-	-	-	-
Bitya_CBD2_12w_CBD7	3771	6797	2017-04-26 00:48:00	2017-05-14 14:17:00	R0002692				Custom	-	-	35	-	0.8	1	224	6	7339	0.6535	0.6534	0.9999	-	-	-	0.1606	! 0.000	-	0.0206	! 0.000	593.21	1401.07	-	-	-	[mg HA/ccm]	-	-	-	-	-	-	-	-	-	-	-	-	-	-
Bitya_CBD2_12w_CBD8	3772	6798	2017-04-26 00:48:00	2017-05-14 14:44:00	R0002692				Custom	-	-	35	-	0.8	1	224	6	7339	0.6298	0.6294	0.9994	-	-	-	0.1618	! 0.000	-	0.0189	! 0.000	630.428	1411.2	-	-	-	[mg HA/ccm]	-	-	-	-	-	-	-	-	-	-	-	-	-	-
Bitya_CBD2_12w_OVX_Veh1	3773	6799	2017-04-26 04:36:00	2017-05-14 15:23:00	R0002693				Custom	-	-	35	-	0.8	1	224	6	7339	0.6311	0.6311	1	-	-	-	0.1598	0	-	0.0178	0	587.463	1357.29	-	-	-	[mg HA/ccm]	-	-	-	-	-	-	-	-	-	-	-	-	-	-
Bitya_CBD2_12w_OVX_Veh2	3774	6800	2017-04-26 04:36:00	2017-05-14 15:44:00	R0002693				Custom	-	-	35	-	0.8	1	224	6	7339	0.6158	0.6156	0.9996	-	-	-	0.1539	! 0.000	-	0.0186	! 0.000	579.389	1378.63	-	-	-	[mg HA/ccm]	-	-	-	-	-	-	-	-	-	-	-	-	-	-
Bitya_CBD2_12w_OVX_Veh3	3775	6801	2017-04-26 04:36:00	2017-05-14 16:01:00	R0002693				Custom	-	-	35	-	0.8	1	224	6	7339	0.7135	0.7131	0.9995	-	-	-	0.1715	! 0.000	-	0.0328	! 0.000	581.168	1374.53	-	-	-	[mg HA/ccm]	-	-	-	-	-	-	-	-	-	-	-	-	-	-
Bitya_CBD2_12w_OVX_Veh4	3776	6802	2017-04-26 04:36:00	2017-05-14 16:28:00	R0002693				Custom	-	-	35	-	0.8	1	224	6	7339	0.6071	0.607	0.9997	-	-	-	0.1518	! 0.000	-	0.0214	! 0.000	575.284	1384.24	-	-	-	[mg HA/ccm]	-	-	-	-	-	-	-	-	-	-	-	-	-	-
Bitya_CBD2_12w_OVX_Veh5	3777	6803	2017-04-26 04:36:00	2017-05-14 16:47:00	R0002693				Custom	-	-	35	-	0.8	1	224	6	7339	0.6316	0.6312	0.9993	-	-	-	0.1586	! 0.000	-	0.0208	! 0.000	583.768	1361.94	-	-	-	[mg HA/ccm]	-	-	-	-	-	-	-	-	-	-	-	-	-	-
Bitya_CBD2_12w_OVX_Veh6	3778	6804	2017-04-26 08:25:00	2017-05-14 17:07:00	R0002694				Custom	-	-	35	-	0.8	1	224	6	7339	0.6524	0.6521	0.9995	-	-	-	0.1628	! 0.000	-	0.0194	! 0.000	601.42	1386.16	-	-	-	[mg HA/ccm]	-	-	-	-	-	-	-	-	-	-	-	-	-	-
Bitya_CBD2_12w_OVX_Veh7	3779	6805	2017-04-26 08:25:00	2017-05-14 17:31:00	R0002694				Custom	-	-	35	-	0.8	1	224	6	7339	0.6767	0.6767	0.9999	-	-	-	0.1566	! 0.000	-	0.0215	! 0.000	573.779	1386.43	-	-	-	[mg HA/ccm]	-	-	-	-	-	-	-	-	-	-	-	-	-	-
Bitya_CBD2_12w_OVX_Veh8	3780	6806	2017-04-26 08:25:00	2017-05-14 18:00:00	R0002694				Custom	-	-	35	-	0.8	1	224	6	7339	0.647	0.6466	0.9994	-	-	-	0.1621	! 0.000	-	0.0206	! 0.000	604.704	1402.17	-	-	-	[mg HA/ccm]	-	-	-	-	-	-	-	-	-	-	-	-	-	-
[truncated: 26 more columns]

[truncated: 16 more sheets: cort rcc, Full meta, t321, Sheet2, Sheet6, Sheet7, DIST meta, d160, Sheet3, Sheet1, Sheet8, PROX meta, p160, Sheet5, Sheet4, Sheet9]
