# Supplementary material for: Osteogenic growth peptide is a potent anti-inflammatory and bone preserving hormone via cannabinoid receptor type 2
Source: eLife. 2022 May 23;11:e65834. doi: 10.7554/eLife.65834 (PMC9154745; doi:10.7554/eLife.65834)
Supplement: Figure 6—source data 1. [file elife-65834-fig6-data1.xlsx]

## Sheet: Sheet1
TNFa mRNA expression in Macrophages from CB2KO							IL1beta mRNA expression in Macrophages from CB2KO
	OGP [M]							OGP [M]
Veh	0	10-14	10-12	10-10	10-8		Veh	0	10-14	10-12	10-10	10-8
0.0227105	8.13792	5.7907	7.24501	7.34286	8.35106		0.447378	62.8492	70.8769	111.551	55.2414	45.3412
1.74248	5.64821	8.34331	5.44323	7.46429	10.3448		0.660649	44.6638	111.79	38.859	43.906	107.645
1.23481	6.92183	6.7413	4.54787	7.86411	9.83198		1.89197	54.3974	44.2608	42.3786	46.1964	105.562
TNFa mRNA expression in Macrophages from WT							IL1beta mRNA expression in Macrophages from WT
	OGP [M]							OGP [M]
Veh	0	10-14	10-12	10-10	10-8		Veh	0	10-14	10-12	10-10	10-8
1.68139	3.63125	0.0313626	0.0426086	0.449697	3.08225		1.10256	149.501	1.20494	0.621997	133.455	156.599
0.515506	2.00218	0.0260393	0.00422312	1.48318	0.841293		1.18616	78.1271	0.948485	3.64697	138.677	55.7277
0.803107	3.07176	0.00182854	0.014012	3.39408	0.185094		0.711281	190.505	0.348526	0.872674	51.8243	91.5934
