# Supplementary material for: Osteogenic growth peptide is a potent anti-inflammatory and bone preserving hormone via cannabinoid receptor type 2
Source: eLife. 2022 May 23;11:e65834. doi: 10.7554/eLife.65834 (PMC9154745; doi:10.7554/eLife.65834)
Supplement: Figure 7—source data 1. [file elife-65834-fig7-data1.xlsx]

## Sheet: cb2ko
	OGP (mean)					Veh (mean)					HU910 (mean)					Indo (mean)
time count	mouse 1	mouse 2	mouse 3	mouse 4	mouse 5	mouse 1	mouse 2	mouse 3	mouse 4	mouse 5	mouse 1	mouse 2	mouse 3	mouse 4	mouse 5	mouse 1	mouse 2	mouse 3	mouse 4	mouse 5
0	0.003333	0.003333	0.016667	-0.01	0.016667	0.016667	0	0.01	0.016667	0	0.003333	0.006667	0.003333	0.01	0.02	0.006667	0.013333	0.003333	0.006667	0.01
0.5	0.036667	0.053333	0.066667	0.05	0.046667	0.06	0.033333	0.05	0.033333	0.056667	0.053333	0.066667	0.056667	0.08	0.08	-0.01667	0.013333	0.006667	0.006667	-0.01
1.5	0.096667	0.083333	0.083333	0.09	0.093333	0.08	0.086667	0.08	0.093333	0.076667	0.113333	0.063333	0.073333	0.103333	0.09	0.006667	0.016667	0.003333	0.016667	0.026667
2.5	0.15	0.156667	0.15	0.143333	0.196667	0.12	0.166667	0.12	0.146667	0.11	0.126667	0.14	0.15	0.13	0.153333	0.006667	-0.01	0.006667	0.01	0.02

## Sheet: WT
	OGP (mean)					Veh (mean)					HU910 (mean)					Indo (mean)
time count	mouse 1	mouse 2	mouse 3	mouse 4	mouse 5	mouse 1	mouse 2	mouse 3	mouse 4	mouse 5	mouse 1	mouse 2	mouse 3	mouse 4	mouse 5	mouse 1	mouse 2	mouse 3	mouse 4	mouse 5
0	-0.00333	0.006667	0.003333	0.013333	-0.00333	0.006667	-0.00333	0.003333	0.006667	0.006667	0.003333	0.01	-0.00667	0.006667	0.006667	0.013333	0.01	-0.00333	0.003333	-0.01333
0.5	0.01	0.013333	0.006667	0.01	0	0.05	0.023333	0.026667	0.036667	0.053333	0.013333	0.006667	0.033333	0.023333	-0.01667	0.003333	-0.00667	0.003333	0	0
1.5	0.03	0.046667	0.046667	0.026667	0.01	0.07	0.066667	0.08	0.07	0.086667	0.03	0.046667	0.046667	0.06	0.033333	0	0.006667	0.01	0.003333	0.006667
2.5	0.026667	0.036667	0.03	0.033333	0.036667	0.1	0.11	0.11	0.053333	0.12	0.036667	0.036667	0.036667	0.046667	0.046667	0	0.003333	0.01	-0.00667	0.006667
