# Supplementary material for: Osteogenic growth peptide is a potent anti-inflammatory and bone preserving hormone via cannabinoid receptor type 2
Source: eLife. 2022 May 23;11:e65834. doi: 10.7554/eLife.65834 (PMC9154745; doi:10.7554/eLife.65834)
Supplement: Figure 8—source data 1. [file elife-65834-fig8-data1.xlsx]

## Sheet: Sheet1
decade of life	3		4		5
	mean	SD	mean	SD	mean	SD
OGP (nmol/ml)	0.187	0.038	0.256	0.051	0.119	0.027
