# Supplementary material for: Osteogenic growth peptide is a potent anti-inflammatory and bone preserving hormone via cannabinoid receptor type 2
Source: eLife. 2022 May 23;11:e65834. doi: 10.7554/eLife.65834 (PMC9154745; doi:10.7554/eLife.65834)
Supplement: Figure 8—source data 2. [file elife-65834-fig8-data2.xlsx]

## Sheet: Sheet1
6 mo + OGP	6 mo + Veh	3 mo
8.88	4.79	6.99
7.52	5.02	6.1
10.35	6.28	8.64
11.51	6.07	6.79
8.3	2.02	8.76
8.86	7.98	9.72
9.46	5.43	10.02
7.99	6.77	6.58
